# Supplementary material for: HOXA9 promotes MYC-mediated leukemogenesis by maintaining gene expression for multiple anti-apoptotic pathways
Source: eLife. 2021 Jul 26;10:e64148. doi: 10.7554/eLife.64148 (PMC8313233; doi:10.7554/eLife.64148)
Supplement: Figure 2—source data 1. [file elife-64148-fig2-data1.xlsx]

## Sheet: all RPKM data
tracking_id	locus	MA10 -MP150916	MA10-MP170719-1	MA10-MP170719-2	HOXA9-MP140824	HOXA9-MP150812	HOXA9-MP170719-1	MYC-MP131204	MYC-MP141113	MYC-MP170719-2
Xkr4	chr1:3204562-3661579	0	0	0	0	0	0	0	0	0
Rp1	chr1:4280926-4399322	0.0198673	0.0222212	0.0134647	0	0	0	0.0768276	0	0
Sox17	chr1:4481008-4487435	0	0	0	0	0	0	0	0	0
Mrpl15	chr1:4763278-4775807	26.8397	29.4952	29.3752	20.8864	18.6089	20.0646	42.6993	39.8793	36.2934
Lypla1	chr1:4797973-4836816	36.0223	38.8139	36.4619	36.8553	41.0947	38.6682	38.4419	40.4639	39.0862
Tcea1	chr1:4847774-4887990	63.8988	66.2598	53.3114	62.8502	56.9875	59.5732	80.0275	73.7523	73.0742
Rgs20	chr1:4899656-5060366	0.040326	0.0864286	0.0653822	0.0140081	0.0356342	0.0488769	0.040837	0.0391372	0
Atp6v1h	chr1:5073253-5152630	42.0882	40.2012	36.047	48.7215	41.151	44.2639	29.2747	30.5568	25.9765
Oprk1	chr1:5578573-5596214	0	0	0	0	0.0109571	0.0119999	0	0	0
Npbwr1	chr1:5903787-5907479	0	0	0	0	0	0	0	0	0
Rb1cc1	chr1:6204742-6266185	9.70664	8.97289	8.80399	11.246	11.2251	10.7956	8.11659	6.93296	7.62804
Fam150a	chr1:6349411-6384812	0	0	0	0	0	0	0	0	0
St18	chr1:6477311-6851021	0.204568	0.0474977	0.0267814	0.457937	0.276598	0.380978	0.0991492	0.0824645	0.0178923
Pcmtd1	chr1:7079000-7163709	6.15056	6.25029	5.16863	7.95044	9.13753	8.94477	3.31238	4.31565	5.30275
Sntg1	chr1:8349819-9289958	0	0	0	0	0	0	0	0	0
Rrs1	chr1:9535488-9537536	55.4742	57.6686	54.026	54.181	48.0447	45.0738	77.3178	85.3271	71.0114
Adhfe1	chr1:9538126-9568049	0.560863	0.766295	0.679652	1.05682	0.636205	0.54989	1.57716	1.22597	1.8562
2610203C22Rik	chr1:9550913-9621173	0.486996	0.0519594	0.141707	0	0	0	0	0	0.0473418
3110035E14Rik	chr1:9591347-9617223	0	0	0	0	0	0	0	0	0
Mybl1	chr1:9657491-9690290	0.914292	1.13659	0.783608	1.03994	0.952336	1.01784	0.86656	0.789854	1.33922
Vcpip1	chr1:9708702-9738463	12.4286	12.2008	10.7774	12.744	12.9111	11.7345	12.1511	11.1024	11.4211
1700034P13Rik	chr1:9737728-9761337	8.9079	7.29584	7.85236	8.4853	8.41805	7.71502	9.10083	8.60604	9.0543
Sgk3	chr1:9788210-9892649	9.54093	9.32537	12.5573	8.02067	6.97135	7.56452	8.29026	8.65256	8.42035
Mcmdc2	chr1:9898718-9931035	2.03113	1.80722	1.5414	1.60545	1.37887	1.50275	1.97886	1.80526	1.20218
Snhg6	chr1:9932105-9934199	46.0496	48.4809	84.7567	56.9452	44.5256	46.3635	77.9854	82.7557	51.6963
Snord87	chr1:9932550-9932624	0	0	0	0	125.015	0	0	128.388	125.386
Tcf24	chr1:9950243-9957566	0.413487	0.534488	21.1019	0.181787	0.180346	0.197448	2.2354	2.26528	3.00541
Ppp1r42	chr1:9958702-9999217	0.13818	0.30959	1.20621	0.13162	0.200887	0.263925	1.36622	1.0728	0.967122
Cops5	chr1:10014680-10028240	45.8161	43.8622	53.7916	41.5979	40.3135	42.9652	45.8186	50.4775	46.78
Cspp1	chr1:10028298-10126849	5.76871	5.8261	7.39371	5.55968	5.55312	5.98897	6.4079	7.56337	6.53151
Arfgef1	chr1:10127587-10222751	37.7784	35.3667	34.9992	37.5869	36.8351	32.2798	56.9452	53.7656	59.0059
Cpa6	chr1:10314799-10710026	0	0.0335711	0.213658	0.0666094	0	0	0.169471	0.0313199	0.0611794
Prex2	chr1:10983545-11293763	0.812378	0.729545	0.767397	0.58179	0.651752	0.750367	0.955285	1.0226	0.814514
A830018L16Rik	chr1:11404185-11965983	0.0201199	0.00755943	0.034268	0.0131273	0.0199946	0.0140996	0.0231783	0.029212	0.00752634
Mir6341	chr1:12416066-12416187	0	0	0	0	0	0	0	0	0
Gm17644	chr1:12657643-12663171	1.14824	0.917636	0.872889	0.667732	0.967658	0.626759	0.608143	0.669114	0.509939
Sulf1	chr1:12682510-12850453	0	0	0	0	0	0	0	0	0
Slco5a1	chr1:12856630-12981216	0.00678101	0.0130228	0.43804	0.0193779	0.0414063	0.0453328	0	0	0
Prdm14	chr1:13103508-13117244	0.0471575	0	0	0	0	0	0	0.021123	0
Ncoa2	chr1:13129185-13364164	12.7417	11.9766	10.7145	14.3996	14.7358	12.5192	10.1685	11.6757	12.6134
Tram1	chr1:13554773-13579991	109.266	110.234	109.638	148.963	148.076	157.502	81.9178	84.5287	82.3365
Lactb2	chr1:13615979-13650590	28.1313	26.1778	26.1923	20.1055	17.0988	15.302	25.7461	29.2468	27.6851
Xkr9	chr1:13658851-13691804	0	0	0	0	0	0	0.0317103	0	0.0286196
Gm5523	chr1:13775765-13777010	224.918	239.388	238.893	174.228	152.103	155.33	153.972	185.997	287.743
Eya1	chr1:14159038-14300280	10.1083	9.06087	4.40356	0	0	0	0	0.0125799	0.0122858
Msc	chr1:14743428-14746047	0	0	0	0	0	0	0	0	0
Trpa1	chr1:14862728-14908943	0.0693887	0.053304	0.109031	0	0	0	0	0.099459	0
Kcnb2	chr1:15302532-15704295	0	0	0	0	0	0	0	0	0
Terf1	chr1:15795726-15834133	12.1126	13.9678	13.5917	11.9598	10.3716	10.2078	9.17798	10.0391	12.9377
Sbspon	chr1:15843942-15882803	0.0442843	0.0425237	0.0193289	0.0210917	0	0	0.0858573	0.0198361	0
4930444P10Rik	chr1:16056059-16083406	0	0	0	0	0	0	0	0	0
Rpl7	chr1:16091375-16094514	912.876	958.828	1176.9	884.379	703.025	762.936	1045.56	1115.77	874.765
Rdh10	chr1:16095962-16122631	2.39758	3.18177	2.28109	1.92458	1.87995	2.46987	3.23818	3.16147	2.16836
Stau2	chr1:16218890-16509383	4.53345	4.8597	3.75503	2.25604	0.472109	0.775597	0.47091	0.562956	0.25689
Ube2w	chr1:16530868-16609419	16.0484	16.4916	15.6199	11.704	13.2374	13.4091	9.47126	10.8035	10.2874
Tceb1	chr1:16632845-16646946	54.6038	61.2198	66.2614	52.4421	47.2393	54.226	57.4402	57.3161	47.9045
D030040B21Rik	chr1:16647632-16652359	0.38919	0.362643	0.408151	0.381937	0.466865	0.292433	0.352246	0.449322	0.341037
Tmem70	chr1:16655271-16668356	16.0698	15.0689	17.2675	14.3253	10.4845	11.4629	22.9639	23.0658	22.1757
Ly96	chr1:16678536-16699686	3.4254	3.13031	2.95781	7.91825	5.69338	6.38855	1.26616	1.46267	2.85591
Jph1	chr1:16985020-17087970	0	0	0	0	0	0	0	0.0109631	0
Gdap1	chr1:17135453-17154351	0	0	0	0	0	0	0	0	0
Pi15	chr1:17591981-17621020	0.244795	0.157746	0.189637	0.093699	0.166488	0.135146	0.129738	0.114807	0.111975
Gm16070	chr1:17666107-17717727	2.83015	3.33468	2.92411	2.65681	3.33942	2.97711	3.08811	3.80921	2.0096
Crispld1	chr1:17717497-17756288	0	0.000889174	0	0	0	0	0	0	0
Crisp4	chr1:18105271-18127132	0	0	0	0	0	0	0	0	0
Defb44-ps	chr1:18200133-18213645	0	0	0	0	0	0	0	0	0
Defb18	chr1:18226553-18227524	0	0	0	0	0	0	0	0	0
Defb41	chr1:18241058-18255219	0	0	0	0	0	0	0	0	0
Gm15386	chr1:18250604-18255219	0	0	0	0	0	0	0	0	0
Tfap2d	chr1:19093102-19156413	0	0	0	0	0	0	0	0	0
Tfap2b	chr1:19198994-19228926	0	0	0	0	0	0	0	0	0
Pkhd1	chr1:20047859-20608138	0	0	0	0	0	0	0	0	0
4930486I03Rik	chr1:20346534-20382381	0	0	0	0	0	0	0	0	0
Linc-md1	chr1:20659962-20673039	0	0	0	0	0	0	0	0	0
Mir133b	chr1:20672849-20672968	0	0	0	0	0	0	0	0	0
Mir206	chr1:20669090-20669163	0	0	0	0	0	0	0	0	0
Il17a	chr1:20720985-20724577	0	0	0	0	0	0	0	0	0
Il17f	chr1:20767229-20774351	0	0.11141	0.101282	0.0552594	0	0	0.0562356	0	0
Mcm3	chr1:20793094-20810294	155.19	163.904	153.514	120.599	111.466	105.167	119.594	110.616	109.61
6720483E21Rik	chr1:20878730-20880554	0	0	0.0536816	0	0	0	0	0	0
Paqr8	chr1:20880702-20928837	0.467633	0.577339	2.2627	0	0.02331	0.0382806	0	0.0119694	0
Efhc1	chr1:20941706-20980922	0.0281086	0	0.294448	0	0	0	0	0	0
Tram2	chr1:20991477-21069306	2.13728	1.59624	2.77787	2.35258	1.24293	1.90511	1.10499	0.978618	0.290877
Tmem14a	chr1:21208655-21220248	0.642759	0.78468	0.918154	0.2783	0.56096	0.419221	0.0952136	0.175987	0
Gsta3	chr1:21230665-21255656	0.0962016	0.138568	0.0388411	0.320745	0.427048	0.534386	0.233149	0.258557	0
Gm4956	chr1:21275326-21288393	0	0	0	0	0	0	0	0	0
Khdc1a	chr1:21339757-21342280	0	0	0	0	0	0	0	0	0
Khdc1c	chr1:21358411-21359824	0	0	0	0	0	0	0	0	0
Khdc1b	chr1:21373636-21376465	0	0	0.0240689	0	0	0	0.0267279	0	0
Kcnq5	chr1:21388483-21952023	2.27197	1.99648	2.23214	0	0	0.00799535	3.31781	3.03161	2.58922
Rims1	chr1:22278502-22812563	0.0167116	0	0	0.0318408	0.0145776	0.0319236	0	0.0149711	0
4933415F23Rik	chr1:23107312-23109092	0	0	0	0	0	0	0	0	0
Mir30a	chr1:23279107-23279178	0	0	0	0	0	0	0	0	0
Mir30c-2	chr1:23298539-23298623	0	0	0	0	0	0	0	0	0
Ogfrl1	chr1:23373262-23390014	27.4243	33.7248	21.1316	20.0637	26.0619	25.6463	20.6653	20.7072	17.7483
B3gat2	chr1:23768764-23854697	0.122131	0.156368	0.153998	0.14219	0.0828624	0.1296	0.131547	0.0364705	0.094981
Smap1	chr1:23851663-23929220	39.1114	42.9104	55.0661	40.5835	44.2883	40.3194	51.0442	56.643	49.4461
Sdhaf4	chr1:24002777-24012479	5.1097	5.25702	5.20391	7.30094	5.30628	4.99614	3.42012	5.88539	5.10915
Fam135a	chr1:24017596-24107180	0.611596	0.302277	0.180581	0.0257021	0.00784567	0	0.00871873	0.048344	0.0157379
Col9a1	chr1:24184448-24259577	0	0	0	0	0	0	0	0	0
Col19a1	chr1:24264521-24594276	0.555779	0.470897	1.79321	0	0	0.00520382	0.015846	0	0.0047672
Lmbrd1	chr1:24685382-24823146	8.0522	7.7538	6.92889	8.33798	7.78924	7.48931	5.81447	6.17472	6.32065
Adgrb3	chr1:25124320-25886552	0	0	0	0	0	0	0	0	0
Gm20172	chr1:25333248-25334799	0.139395	0.103736	0.103432	0.0995862	0.148955	0.139783	0.125668	0.171706	0.167691
4931408C20Rik	chr1:26738645-26744305	2.74346	1.57277	0.643406	0.325039	0.13097	0.286778	0.145544	0.0978203	0.0119417
Gm597	chr1:28832966-28837097	0	0	0	0	0	0	0	0	0
Mir6342	chr1:29478332-29478457	0	0	0	0	0	0	0	0	0
Phf3	chr1:30859186-30920101	29.4474	28.7619	24.8705	26.4604	25.3535	23.2241	26.7869	25.0155	27.7466
Ptp4a1	chr1:30997147-31006600	6.31202	5.78439	7.01616	4.84948	4.64705	3.98166	4.21261	5.02235	3.98944
Gm13363	chr1:30998436-31006555	62.789	59.7772	57.6917	64.4012	56.5803	58.8951	55.8935	59.3956	54.0639
4931428L18Rik	chr1:31197922-31279501	0	0	0	0	0	0	0	0.0566994	0
Lgsn	chr1:31233279-31261570	0	0	0	0	0	0	0	0	0
Pih1d3	chr1:31279683-31281132	0	0	0	0	0	0	0	0	0
Gm4850	chr1:31321691-31324906	0	0	0	0	0	0	0	0	0
Khdrbs2	chr1:32229650-32714583	0	0	0	0	0	0	0	0	0
Gm9839	chr1:32576407-32577844	0.0114212	0.0146228	0	0.0145058	0	0	0.0442862	0	0.0433007
Gm5415	chr1:32600390-32604138	0.019868	0.00508749	0	0.0151403	0.0138649	0	0.00513594	0	0.0382418
Prim2	chr1:33510652-33726639	25.2084	25.2135	28.2216	21.6203	23.709	24.4393	17.534	19.906	21.8047
1700001G17Rik	chr1:33726668-33727557	0.328928	0.0789626	0.143568	0	0.143465	0.235604	0.159429	0.147335	0.0719452
Rab23	chr1:33776740-33799409	2.79118	2.65393	1.52494	3.47457	1.77835	2.69182	1.93645	1.74053	2.82508
Bag2	chr1:33802328-33814595	32.9725	35.0191	33.5143	22.6819	14.976	17.3312	45.2839	40.6271	48.5182
Zfp451	chr1:33818385-33871440	12.5019	12.0013	11.5548	11.597	10.3477	10.3073	13.7114	14.2682	14.4527
Gm15455	chr1:33892743-33895759	4.1466	4.39531	4.61651	3.34881	4.02779	3.49144	4.6896	5.15038	5.00368
Bend6	chr1:33908896-33964466	0	0	0.0235502	0.0770937	0.0470663	0.0772943	0.0523038	0.0725041	0.354045
Dst	chr1:33965069-34365507	1.9025	0.787165	0.292576	0.272998	0.362642	0.282727	0.440865	0.681762	1.3452
Mir6896	chr1:34174203-34174276	0	0	0	0	0	0	0	0	0
Mir5103	chr1:34489965-34490044	0	0	0	0	0	0	0	0	0
Ccdc115	chr1:34493514-34496517	70.9653	73.0448	64.6026	66.8122	71.2996	72.0754	68.611	65.2889	65.9295
Imp4	chr1:34496673-34502592	51.3439	55.9151	52.4189	46.0744	42.2412	44.8263	76.5273	79.5561	69.7675
Ptpn18	chr1:34516590-34530624	13.784	14.3028	19.2524	16.4616	25.089	25.5819	21.4192	23.9228	20.8075
Prss39	chr1:34555274-34559907	0	0	0.0471904	0	0	0	0	0	0
Cfc1	chr1:34592492-34601156	0	0	0	0	0	0	0	0	0
Prss40	chr1:34609176-34617788	0	0	0	0	0	0	0	0	0
Amer3	chr1:34636537-34647789	0	0	0	0	0	0	0	0	0
AA619741	chr1:34690379-34693055	0	0	0	0	0	0	0	0	0
Arhgef4	chr1:34858566-34869599	2.44619	3.10318	4.48628	2.00948	2.36877	1.73607	2.54534	3.09613	3.23973
Fam168b	chr1:34870062-34899895	47.3691	44.5623	42.3769	53.151	53.2286	52.0196	38.0663	40.1744	35.3861
Plekhb2	chr1:34906803-34936430	31.5845	28.2296	26.2674	42.8604	41.4416	43.0685	13.1537	15.8218	20.771
Hs6st1	chr1:36125244-36163291	8.79801	8.81755	5.60976	12.9144	14.9579	14.754	15.8767	11.1119	11.9598
Uggt1	chr1:36196872-36301147	42.8873	41.0106	45.3784	47.328	49.5384	53.0473	23.8036	25.1458	22.8853
Mir6897	chr1:36201096-36201158	0	0	0	0	0	0	0	0	0
Neurl3	chr1:36321446-36330270	22.194	25.0556	39.6028	24.9341	35.9321	32.7553	15.7917	14.5831	8.10682
Arid5a	chr1:36364577-36380874	3.31379	3.01465	4.88892	3.84372	3.75765	4.66846	2.45493	1.61062	2.60991
Kansl3	chr1:36392574-36426026	11.2937	11.2087	11.1601	12.0937	11.2292	10.9187	12.491	10.6494	11.9146
Mir6898	chr1:36405526-36405603	0	0	0	0	0	0	0	0	0
Fer1l5	chr1:36429135-36478955	0.479089	0.291949	0.369963	0.307166	0.184848	0.228774	0.330455	0.346655	0.185397
Lman2l	chr1:36480030-36502084	11.4833	12.7664	15.3041	9.69069	12.6672	11.2864	12.0504	11.4609	7.9009
Cnnm4	chr1:36528441-36565621	6.04728	5.78832	4.82407	5.92585	6.2011	5.96584	5.94946	5.69986	4.55909
Cnnm3	chr1:36568720-36585082	8.09334	8.44129	7.58833	9.42764	11.409	10.8427	10.4737	10.2095	8.99626
Ankrd23	chr1:36587378-36592574	1.83473	1.91633	1.91071	2.0543	1.74086	2.05965	2.05939	2.04735	2.25294
Ankrd39	chr1:36595017-36604046	3.09776	2.6327	2.89068	3.66307	3.32343	3.53657	3.21003	3.82777	3.76943
Sema4c	chr1:36605483-36615226	1.34313	1.32098	1.66107	1.62267	2.18794	2.16099	0.535641	0.308146	0.988871
Fam178b	chr1:36619540-36740028	0.0803547	0.15432	0.101384	0	0.067449	0	0	0.103903	0.135309
Cox5b	chr1:36748331-36750233	420.376	410.628	418.63	381.543	342.47	384.526	313.41	370.649	396.616
Actr1b	chr1:36756046-36766770	34.5556	31.9111	31.8454	41.2241	32.5308	37.1666	33.731	37.773	35.8901
4933424G06Rik	chr1:36771382-36814805	0	0.117204	0	0.290665	0.053236	0.116569	0	0.109344	0
Zap70	chr1:36818642-36839665	0	0	0	0	0	0.0262885	0	0	0
Tmem131	chr1:36849033-36996372	28.9196	27.0025	19.9436	26.4481	24.5455	22.7009	30.9953	27.6179	23.756
Cnga3	chr1:37275122-37320229	0.100879	0.0484291	0.0293478	0.0480415	0.127846	0.0200635	0.154841	0.0602451	0.0735481
Inpp4a	chr1:37356682-37467585	4.34064	4.09684	4.76646	5.26065	6.62365	6.22093	3.14606	2.63326	5.13605
Coa5	chr1:37473929-37486948	52.1412	51.8278	46.5113	48.2154	42.0583	42.5317	47.1863	50.532	41.3141
Unc50	chr1:37487016-37495969	14.1756	14.015	16.6486	20.4323	18.7518	19.5503	13.4704	14.4955	14.279
Mgat4a	chr1:37496184-37597861	7.35981	6.50924	4.37531	9.51278	8.93438	9.46517	6.47798	5.86885	4.44584
4930594C11Rik	chr1:37542695-37545450	0.145737	0.042407	0.192759	0.147237	0.105941	0.12864	0.0963244	0.0791265	0.0965957
2010300C02Rik	chr1:37668520-37776656	0.23036	0.234213	0.0709736	0.193616	0.791967	0.517652	1.36612	0.983282	0.0355664
Tsga10	chr1:37811416-37922143	1.58335	1.06855	0.832186	1.35901	1.08107	1.2388	0.507127	0.799292	0.748635
Lipt1	chr1:37929050-37933143	4.00268	3.88358	4.04009	2.97874	2.0004	2.54847	5.69897	5.71487	5.90957
Mitd1	chr1:37935734-37947256	17.8055	22.2691	27.1528	16.5944	20.997	21.7285	19.5512	20.8743	21.0594
Mrpl30	chr1:37947397-37955178	49.7356	48.6467	54.6745	51.7831	42.578	48.2726	64.4709	70.7709	57.7825
Lyg2	chr1:37962767-37973338	0	0	0	0	0	0	0	0	0
Lyg1	chr1:38003582-38014604	0	0	0	0	0	0	0	0	0.0829669
Txndc9	chr1:38040711-38054053	14.3261	15.4068	14.9467	15.4546	15.2268	15.5806	14.447	15.4537	13.7235
Eif5b	chr1:38054854-38112424	37.2119	38.9311	36.7777	33.6304	31.7552	32.9811	38.1296	37.6297	40.0082
Rev1	chr1:38109630-38186507	10.8134	11.9297	12.1175	9.89052	10.2319	9.6246	19.8614	20.0459	16.614
Aff3	chr1:38232835-38684089	0	0	0.607074	0	0	0	0	0.00716093	0.00699352
Lonrf2	chr1:38851353-38878060	0	0.0111	0	0	0	0	0	0	0.0101135
Chst10	chr1:38920717-38955005	0	0	0.0168689	0	0	0	0	0.0173115	0
Nms	chr1:38995993-39007121	0	0	0	0	0	0	0	0	0
Pdcl3	chr1:39044658-39054081	28.6522	29.5658	28.1548	26.4356	29.0504	29.3697	18.8682	20.5614	26.0524
Mir6349	chr1:39243740-39243837	0	0	0	0	0	0	0	0	0
Npas2	chr1:39251116-39420085	0.0425023	0	0	0.0134953	0.0123585	0	0	0	0
Rpl31	chr1:39424695-39428755	296.769	306.679	361.787	297.771	244.441	266.987	287.942	323.052	287.767
Tbc1d8	chr1:39428341-39535592	7.7164	9.83691	9.05878	9.8976	16.9091	13.138	14.0705	11.9424	17.5646
Cnot11	chr1:39592646-39603722	16.8685	16.0152	16.6344	15.7965	15.6271	16.8184	16.9973	16.1849	16.6218
Snord89	chr1:39605591-39605685	0	0	0	39.1021	0	0	0	0	0
Rnf149	chr1:39608143-39634192	22.4104	15.836	14.3301	33.9243	22.3291	22.2966	11.9656	14.2302	14.6499
Creg2	chr1:39675250-39708027	0.23523	0.128056	0.0647489	0.594068	0.364294	0.31221	0.037855	0.109857	0.290316
Rfx8	chr1:39722145-39777834	0	0	0	0	0	0	0	0	0
Gm3646	chr1:39860985-39862177	0	0	0	0	0	0	0	0	0
1700066B17Rik	chr1:39899272-39904175	0	0	0	0	0	0	0	0	0
Map4k4	chr1:39957757-40083155	10.4408	5.27825	7.61854	3.48948	2.01672	1.86013	1.90769	3.46823	3.72726
Gm16894	chr1:40133056-40142696	0.344519	0.330822	0.300747	0.574305	0.826456	0.082257	0.166986	0	0.0753554
Il1r2	chr1:40141612-40182070	4.00586	6.50597	10.8361	30.0083	77.6528	65.935	7.52675	4.56334	11.2498
Il1r1	chr1:40281924-40373022	0.521679	0.465163	0.162638	0.863717	0.541757	0.699887	0.921947	0.545238	1.64096
Il1rl2	chr1:40381471-40422316	10.1948	10.0063	6.05506	26.9208	23.8369	22.2459	21.6106	16.5319	17.3591
Il1rl1	chr1:40486414-40522259	0.0663353	0.0636981	0.195086	0.052657	0.0289327	0.0322046	0.0679012	0.0302085	0.021764
Il18r1	chr1:40522396-40557699	0.0157459	0.135972	0.835517	0.146085	2.28297	0.694252	0.720769	1.17013	3.08747
Il18rap	chr1:40572206-40608550	4.05189	6.00361	7.58848	10.5024	17.6937	12.367	10.9677	13.5609	13.1597
Slc9a4	chr1:40637071-40687576	0.0467079	0.0448509	0	0.0593227	0	0.0148693	0	0.0139478	0
Slc9a2	chr1:40738556-40825730	0.0171267	0.0164458	0	0	0	0	0.116217	0.230144	0.0449528
Mfsd9	chr1:40828884-40847502	0.840741	0.623835	0.583802	0.764453	0.583381	0.547459	0.46307	0.650472	0.80244
Tmem182	chr1:40862445-40912112	0	0	0	0	0	0	0	0	0
4930448I06Rik	chr1:41224404-41238097	0	0	0	0	0	0	0	0	0
Pantr1	chr1:42705044-42751670	0	0	0	0	0	0	0	0	0
Pou3f3	chr1:42753990-42757054	0	0	0.0171933	0	0	0	0	0	0
2900092D14Rik	chr1:42757180-42760021	0.00427225	0.0136747	0.0186473	0	0	0.0204008	0.00657762	0.000956825	0
Pantr2	chr1:42763907-42770299	0	0	0	0	0	0	0	0	0
Dalir	chr1:42807556-42809731	0	0.0274429	0	0	0	0	0	0	0
Mrps9	chr1:42908077-42962528	42.0963	46.6998	49.7796	35.7713	34.4566	36.1301	55.0094	54.5744	53.7853
Gpr45	chr1:43009716-43092294	0	0	0	0	0	0	0	0	0
Tgfbrap1	chr1:43104113-43155467	8.22664	7.51423	6.12127	10.5021	13.6616	12.1734	6.41874	7.22793	7.98289
AI597479	chr1:43155554-43172791	7.34208	7.68204	8.07203	6.16903	5.63425	5.3582	7.33554	7.80291	7.40839
Fhl2	chr1:43179915-43253606	0	0	0	0	0	0	0	0	0
Nck2	chr1:43502595-43627363	6.04705	7.30038	6.82796	6.19845	6.99504	7.74207	2.97345	2.23756	1.74437
1500015O10Rik	chr1:43787446-43799409	0	0	0.0718891	0.0784453	0	0	0.0798311	0	0.0720504
Uxs1	chr1:43807075-43884553	37.34	35.1405	36.5427	39.1153	36.5163	38.6075	44.6532	39.6458	38.7189
Tpp2	chr1:43990851-44059816	39.6779	39.074	39.991	35.2244	36.6568	32.9802	39.5198	38.2815	40.7571
Mettl21c	chr1:44066252-44076851	0.0638652	0.0613261	0.0557509	0	0	0	0.0619101	0	0
Tex30	chr1:44143461-44159233	28.085	29.6703	36.1494	32.0627	26.7683	33.7686	35.82	34.3868	27.6374
Kdelc1	chr1:44163390-44175618	17.51	17.2221	21.7334	22.3994	18.0556	21.2396	20.8118	22.6369	17.4351
Bivm	chr1:44176812-44201616	4.85168	4.57847	4.49814	5.81673	5.4143	5.25667	6.69795	6.51957	7.28929
Ercc5	chr1:44204588-44238105	2.97485	3.01291	2.98448	2.77733	3.71822	3.05311	3.93112	3.84505	3.05592
Mettl21e	chr1:44260914-44275776	0.909604	0.605704	0.534581	0.487354	0.562352	0.676446	0.484125	0.547554	0.708414
Gulp1	chr1:44608515-44853681	0	0	0	0	0	0.970363	0	0	0
4930521E06Rik	chr1:44796519-44801794	0	0	0	0	0	0	0	0	0
Col3a1	chr1:45368382-45406551	0.0210186	0	0	0	0	0	0	0	0
Col5a2	chr1:45431175-45560127	0	0.00843711	0.00767009	0	0	0	0.00851745	0	0
Wdr75	chr1:45852345-45880458	37.5219	38.1641	43.455	31.4858	29.6497	28.3729	70.7509	65.1324	52.8648
Slc40a1	chr1:45964914-45982439	3.28117	6.063	4.39707	11.2687	25.2958	20.4449	9.98919	10.8203	10.8311
Stk-ps2	chr1:46077259-46087282	0	0	0	0	0	0	0	0	0
Dnah7b	chr1:46123582-46430395	0.00232499	0	0	0	0	0	0.00450763	0.00416569	0
Slc39a10	chr1:46864388-46910354	11.6165	10.154	11.5567	6.76781	4.47267	5.53011	12.248	12.263	9.62459
Mir6350	chr1:47523864-47523969	0	0	0	0	0	0	0	0	0
Tmeff2	chr1:50984366-51244114	0	0	0	0	0	0.0171601	0	0	0
9330175M20Rik	chr1:51275229-51390623	0	0	0	0	0	0	0	0	0
Sdpr	chr1:51345969-51359804	0	0	0	0	0	0	0	0	0
Nabp1	chr1:51526331-51535243	10.4576	10.4114	17.4177	10.7355	10.3535	8.80276	8.43748	8.41049	14.7064
Myo1b	chr1:51806601-51972822	2.6852	1.13932	0.305024	0.304228	0.030956	0.230142	0.0350347	0.032377	0.0527038
Stat4	chr1:52043991-52164033	7.05839	8.40569	6.58132	6.43922	13.1531	14.335	0.13329	0.164239	0.561401
Stat1	chr1:52176281-52218709	11.8381	11.7957	12.0414	12.5303	16.9084	14.248	6.62636	8.93035	9.39198
Gls	chr1:52220293-52290076	29.1877	28.1269	27.321	30.8428	25.3784	24.8507	51.109	45.6512	42.845
Nab1	chr1:52512692-52557292	21.4877	20.976	19.5624	26.1805	26.2992	24.5744	19.8509	20.8196	27.235
Tmem194b	chr1:52687548-52708763	1.37956	1.72041	2.00394	1.68959	1.42296	1.50659	0.376591	0.55368	0.987534
Mfsd6	chr1:52713147-52784162	5.04574	4.37129	3.48927	11.2972	12.1574	12.9778	2.58795	2.39597	7.6742
Inpp1	chr1:52846263-52874532	4.80774	5.99468	9.70925	7.51883	13.5205	11.3761	12.9035	8.71045	11.7086
Hibch	chr1:52901889-52977704	20.9921	24.4126	27.0777	20.7474	21.1617	20.6221	27.9942	26.9135	29.3727
1700019D03Rik	chr1:52981970-53009684	0	0.085856	0.234153	0.425845	0	0	0.346695	1.44178	3.52017
Mstn	chr1:53118506-53124923	0	0	0	0	0	0	0	0	0
1700019A02Rik	chr1:53215420-53244461	0	0	0	0	0	0	0	0	0
Pms1	chr1:53246031-53353840	4.68251	5.07035	5.06165	3.9479	5.31872	4.71936	5.17659	5.30156	5.87493
Ormdl1	chr1:53353938-53367089	13.6879	14.3296	17.3392	19.1493	25.2269	26.0465	10.0098	12.0471	10.775
Osgepl1	chr1:53370467-53383186	5.98873	8.83094	8.06785	8.24603	12.6641	12.7918	5.22081	5.307	4.38604
Asnsd1	chr1:53401460-53409596	38.1946	43.7484	48.4173	41.6397	52.2661	50.1276	35.3299	38.8302	35.4686
Dnah7a	chr1:53453845-53763628	0.0303401	0	0.00814932	0.0133388	0	0	0.00904963	0.00836313	0.00816761
Stk17b	chr1:53812355-53842059	15.1911	13.3202	12.4452	19.7768	20.6524	22.6108	7.22978	6.02469	9.73159
Hecw2	chr1:53863717-54251878	0.0359279	0.0246425	0.0530599	0.00977814	0.0530394	0.0245089	0	0.00919601	0
Mir7681	chr1:53906267-53906339	0	0	0	0	0	0	0	0	0
Ccdc150	chr1:54307526-54425571	0.0781706	0.0150125	0.0272955	0.0297848	0.0136379	0	0.0454665	0.0420175	0.0136784
Gtf3c3	chr1:54454424-54495815	8.60731	9.1148	8.53195	6.93465	6.36803	5.89634	7.38857	8.8639	8.63907
Pgap1	chr1:54529843-54614528	0.119446	0.0729894	0.0758331	0.0568899	0.0426253	0.0777789	0.0263159	0.0486392	0.175757
Ankrd44	chr1:54702183-54983231	21.7215	21.4411	17.1973	20.8537	24.7591	21.2025	21.8201	24.679	24.0273
Sf3b1	chr1:55042012-55084322	107.838	109.87	104.365	85.0741	81.0259	77.7218	82.8018	83.7849	87.8424
Coq10b	chr1:55109613-55129546	7.14711	7.25217	7.78278	8.99011	9.25555	10.9238	6.2173	6.55103	7.14291
Hspd1	chr1:55134677-55144776	419.666	415.538	414.109	282.961	207.552	220.825	707.006	648.346	525.138
Hspe1	chr1:55144991-55148161	206.538	214.151	234.874	158.876	121.041	144.982	312.667	286.399	214.824
Mob4	chr1:55188088-55211743	9.99989	9.67153	9.2045	10.5782	10.0483	10.1709	10.5699	9.74778	9.40359
Rftn2	chr1:55227003-55283626	0.32448	0.342737	0.141627	0.177725	0.198135	0.216923	0.110091	0.0872056	0.113556
Mars2	chr1:55294020-55296902	5.55303	6.48354	6.46334	5.93076	6.42198	5.14265	11.6633	12.7571	11.4466
Boll	chr1:55356912-55420313	0	0	0	0	0	0	0	0	0
Plcl1	chr1:55462789-55811129	0.114175	0.125917	0.092785	0.0792446	0.102783	0.0858538	0.0672452	0.0874971	0.0856797
9130227L01Rik	chr1:55988084-56028942	0	0.0317802	0	0.0630519	0.0288703	0	0.0320829	0	0
1700003I22Rik	chr1:56075821-56077047	0	0	0	0	0	0	0	0	0
Hsfy2	chr1:56692892-56694295	0	0	0	0	0	0	0	0	0
Satb2	chr1:56850824-57028178	1.87323	1.57524	2.25449	0.105583	0.00966891	0.0846864	13.4418	12.1441	4.02451
9130024F11Rik	chr1:57028312-57032040	0.433752	0.466301	0.361308	0.103396	0	0.0152659	2.86878	2.18103	0.804571
BC055402	chr1:57257488-57271840	0	0	0	0	0	0	0	0	0
4930558J18Rik	chr1:57416065-57434388	1.00588	0.761007	0.878084	0.871059	0.664735	0.640438	0.561416	0.628055	0.80005
1700066M21Rik	chr1:57434463-57442266	4.07953	3.87874	3.50859	4.53685	5.71486	4.60623	3.75983	4.33877	3.9736
Tyw5	chr1:57445087-57463518	7.04939	6.804	8.05988	6.53104	5.98532	7.26924	9.15152	8.38498	6.71585
9430016H08Rik	chr1:57463391-57472802	12.512	11.3873	11.4487	11.7749	10.6515	12.7173	17.8282	17.5111	13.5847
Spats2l	chr1:57831704-58005241	0	0	0	0	0	0	0	0	0
Kctd18	chr1:58011944-58026928	3.56411	3.79198	3.38272	4.09373	3.9099	4.0688	2.39748	2.85172	3.83747
Sgol2a	chr1:58042183-58083121	9.6786	11.2732	9.97481	9.85696	9.76739	8.94911	7.50928	9.07678	10.995
Aox1	chr1:58086812-58163254	0.0134825	0.0647322	0.0117695	0.0128428	0.0823269	0.051505	0.222185	0.169096	0.542611
Aox3	chr1:58169979-58257296	0	0.013015	0	0.0129108	0.0118232	0.0129444	0	0	0
Aox4	chr1:58267240-58325440	0.0118141	0.0113444	0	0	0	0	0.0114525	0	0
Aox2	chr1:58335169-58436108	0	0.0236615	0.0107552	0	0.0107475	0	0.0238869	0	0.0431175
Bzw1	chr1:58449979-58463392	171.174	166.488	152.55	167.83	148.459	145.798	199.748	194.961	180.655
Clk1	chr1:58468831-58480932	34.5245	36.8288	37.9412	24.5657	27.0795	27.2861	22.3301	21.8502	22.7748
Ppil3	chr1:58487836-58502330	25.9965	26.6025	26.8065	23.8442	21.4479	23.8503	32.099	35.5109	26.0001
Nif3l1	chr1:58504476-58519120	14.3933	15.4447	17.0631	11.0023	11.9872	11.8229	24.4687	24.3028	20.0172
Orc2	chr1:58519614-58561953	30.2301	29.7212	30.9938	26.7981	21.3572	21.7907	48.292	46.2443	31.6232
Fam126b	chr1:58579649-58643177	3.67527	4.077	2.94192	3.93695	6.11687	3.47834	10.624	9.93691	11.0918
Ndufb3	chr1:58643442-58652792	116.605	134.396	129.974	116.799	132.876	137.604	148.494	162.307	168.879
Gm20257	chr1:58709484-58712675	3.53979	4.47051	3.15723	4.72794	6.10852	7.12873	3.84171	2.6541	3.02966
Als2cr12	chr1:58714963-58752833	0.0410564	0.0394241	0.0358401	0	0.0358142	0.196052	0.238797	0.183902	0.143682
Cflar	chr1:58768334-58816053	14.0535	12.5586	12.4122	16.8328	17.3573	16.1146	10.3271	9.29168	9.67094
Casp8	chr1:58852217-58904347	44.9999	43.6502	40.2613	43.0267	40.5669	42.9664	26.2202	25.7535	37.1616
Trak2	chr1:58957293-59030326	12.3466	11.5869	12.171	16.8457	20.2786	17.6204	14.7731	13.318	15.8399
Stradb	chr1:59030414-59051965	4.66525	4.88935	4.44486	4.62168	5.3951	5.98308	5.63366	5.13465	5.64435
Als2cr11	chr1:59107349-59151744	0.0292317	0	0	0	0	0	0	0	0
Tmem237	chr1:59157436-59176940	3.47926	3.17233	5.77072	4.37475	3.91518	3.45575	2.22602	2.02598	1.67421
Mpp4	chr1:59177778-59220233	0	0	0.0459344	0	0	0.0449156	7.17155e-288	0	0
Als2	chr1:59219599-59294075	4.84476	4.58046	11.7208	6.25483	6.90577	6.32357	2.22565	2.10547	3.34141
Cdk15	chr1:59313750-59409213	0	0	0	0	0.0385994	0	0	0	0
Fzd7	chr1:59538990-59543799	12.6237	9.16187	9.07643	5.32496	4.20416	3.57479	3.91309	4.33949	7.18112
Gm973	chr1:59573107-59691353	0	0.0159511	0.043503	0	0	0	0	0	0
Sumo1	chr1:59696277-59727678	132.605	147.289	149.56	113.736	110.619	110.413	131.3	129.376	137.124
Nop58	chr1:59741849-59768354	144.924	150.548	169.551	113.401	91.952	88.2243	226.494	174.427	166.483
Snord70	chr1:59748801-59748854	0	0	0	0	0	0	0	0	0
Snord11	chr1:59761651-59761714	0	0	0	0	0	0	0	0	0
Bmpr2	chr1:59821122-59934925	6.86331	4.82106	7.59983	5.67489	3.04767	2.76326	3.98891	4.02481	3.94883
Fam117b	chr1:59969849-60042192	15.2714	15.2021	23.0366	14.7583	13.8193	14.2113	17.6725	17.2597	17.1336
Ica1l	chr1:60045911-60099931	0.081732	0.125572	1.22718	0.0467127	0.057037	0.124891	0.110922	0.263591	0.0572063
Wdr12	chr1:60133711-60155344	30.235	30.7115	31.1718	25.165	21.2482	21.373	36.0753	37.2534	25.8621
Carf	chr1:60155090-60210797	1.20555	1.44578	1.35243	0.903247	1.07272	0.931779	1.24811	1.6527	1.58023
Nbeal1	chr1:60237442-60391549	1.44799	0.904232	1.41686	1.70835	1.53967	1.26991	0.908256	1.00892	1.15922
Cyp20a1	chr1:60400215-60444231	12.5948	15.1802	17.8947	19.899	16.3285	17.2547	19.0296	21.6713	16.9849
Abi2	chr1:60466462-60538007	5.97816	6.7832	4.75251	5.36945	5.52435	6.06684	6.64936	7.82923	4.59589
Raph1	chr1:60540028-60623609	3.08414	2.36072	2.71988	2.88365	2.64625	2.99677	0.808697	1.21727	1.55375
Cd28	chr1:60803231-60830203	4.62909	3.70859	3.28776	8.55805	10.1907	10.3984	1.08865	0.650265	1.46184
Ctla4	chr1:60965868-60972676	0.0347878	0	0.0303679	0	0	0	0	0	0
Icos	chr1:61034757-61057164	0.0369375	0	0.0483667	0	0	0.0176383	0	0	0
9530026F06Rik	chr1:61435275-61452748	0.0818733	0.117927	0.13103	0.233968	0.178549	0.0586441	0.079367	0.0366731	0.157589
Pard3b	chr1:61685397-62688858	0	0	0	0	0.00300058	0	0	0.00616306	0.00694496
Nrp2	chr1:62749890-62865266	9.81139	5.00099	2.49861	34.7777	31.1589	28.3519	42.179	46.2204	41.7501
4930487H11Rik	chr1:62837491-62841306	0.326071	0.078277	0	0.0776506	0.142219	0.0778526	0.0790224	0.219084	0.213962
Ino80d	chr1:63094374-63160841	10.1302	9.88749	11.013	11.409	15.3738	11.6051	12.3068	13.4291	11.7663
Ino80dos	chr1:63161044-63204869	1.52646	1.45518	1.60705	1.49313	3.2449	3.49467	1.757	1.41903	2.04163
Ndufs1	chr1:63190165-63223396	53.6732	51.7997	51.248	52.5514	42.7063	44.154	55.3796	57.1588	58.4311
Eef1b2	chr1:63223404-63227060	220.219	235.396	286.092	251.093	172.506	201.279	293.048	313.984	235.669
Snora41	chr1:63225596-63225709	36.2764	17.4171	15.8337	34.5554	31.6445	0	87.9147	97.4947	142.823
Gpr1	chr1:63229144-63260855	0.0706768	0	0	0	0	0	0	0	0.0309178
Zdbf2	chr1:63246931-63361149	0	0	0	0	0.00793742	0	0	0	0.00397516
Adam23	chr1:63492477-63643089	0	0	0	0	0	0	0	0	0
Dytn	chr1:63669424-63733501	0	0	0	0	0	0	0	0	0
Mdh1b	chr1:63745400-63776892	0	0	0	0.0356053	0	0	0.0362343	0.0334856	0
Fastkd2	chr1:63777198-63799959	10.3237	12.2924	10.585	11.014	9.18562	9.734	13.9197	15.302	11.7091
4933402D24Rik	chr1:63801482-63815841	0.0725895	0.0697035	0.0633668	0.0691458	0	0.0346628	0.105551	0.0325147	0.158773
Gm13749	chr1:64011300-64015573	0	0	0	0	0	0	0	0	0
Klf7	chr1:64082246-64167963	7.42749	7.51513	5.74404	5.79305	5.39202	4.71315	6.3303	6.20735	5.80055
Mir6899	chr1:64089011-64089075	0	0	0	0	0	0	0	0	0
Creb1	chr1:64579377-64651122	22.3738	24.6905	22.8576	16.4342	16.0945	14.3553	13.6784	15.688	16.4123
Mettl21a	chr1:64653053-64663742	2.90571	3.20762	2.29686	2.83324	2.23533	2.70951	1.5969	2.07017	2.20193
2810408I11Rik	chr1:64726442-64737233	4.64793	4.03808	5.60307	10.2253	9.17082	11.2031	5.14931	4.75869	4.0665
Ccnyl1	chr1:64737918-64772216	3.27089	3.20048	3.45168	5.48208	5.12863	4.74504	3.59219	3.91315	3.94845
Fzd5	chr1:64777131-64784324	0.818965	0.762158	0.879005	1.61686	1.16142	1.55659	0.529261	0.665213	0.701885
Plekhm3	chr1:64835694-65003398	1.36141	0.783073	0.388301	2.15067	1.61675	1.72501	0.718664	0.863391	0.837309
Akr1cl	chr1:65059659-65079322	0	0.0235378	0.235378	0	0.0213825	0	0	0	0
Cryge	chr1:65095130-65097737	0	0	0	0	0	0	0	0	0
Crygd	chr1:65108411-65110014	0	0	0	0	0	0	0	0	0
Crygc	chr1:65118098-65120106	0	0	0	0	0	0	0.0644705	0	0
Crygb	chr1:65126795-65128864	0	0	0	0	0	0	0	0	0
Cryga	chr1:65146962-65149937	0	0	0.119639	0.13055	0	0	0.199284	0	0
D630023F18Rik	chr1:65151858-65169788	0.808352	0.624414	0.427007	0.281111	0.16326	0.309372	1.96766	0.740403	1.34489
Idh1	chr1:65205189-65233053	114.368	111.145	91.2594	126.41	110.638	112.516	61.8605	55.7245	68.8358
Pikfyve	chr1:65233258-65325270	7.81155	6.87448	6.64257	8.34246	7.74271	6.75932	6.48782	5.90814	6.30145
Pth2r	chr1:65357830-65435818	0	0	0	0	0	0	0.0741247	0.0228339	0.0669001
Crygf	chr1:65973095-65974878	0	0	0	0	0	0	0	0	0
Map2	chr1:66221902-66489157	0	0	0	0	0	0	0	0	0
Unc80	chr1:66515020-66745722	0.143688	0.158266	0.0332026	0.0281794	0.0737302	0.0484331	0.0450641	0.0492176	0.0147898
Rpe	chr1:66747466-66766379	44.0002	50.7234	41.1462	36.6931	44.8838	41.5784	46.8623	42.7666	44.3873
Kansl1l	chr1:66765816-66864169	4.09427	4.4749	3.7364	3.89383	4.44825	4.68007	3.13511	2.66432	3.07014
Acadl	chr1:66877412-66909883	68.5062	67.1783	69.6989	51.8419	51.842	51.6066	37.541	38.1075	57.9584
Myl1	chr1:66970869-66991630	0	0	0	0	0	0	0	0	0
Lancl1	chr1:67047090-67085446	4.07831	4.91178	4.57852	4.53983	5.11695	5.41636	5.03302	5.16617	4.59354
Cps1	chr1:67169600-67277841	0	0	0	0	0	0	0	0	0
Erbb4	chr1:68086539-69154633	0	0	0	0	0	0	0	0	0
Ikzf2	chr1:69577783-69732534	0.342245	0.316901	8.00788	1.28657	1.10355	1.20237	0.00592443	0.0438	0.016041
Spag16	chr1:69873543-70771706	0	0	0.0145267	0	0	0	0	0.0149078	0.0448429
Vwc2l	chr1:70772288-70931971	0	0	0	0	0	0	0	0	0
Bard1	chr1:71074108-71149546	6.19799	6.27133	6.3576	5.27979	6.13749	4.7293	4.14434	4.54206	5.58243
Abca12	chr1:71289663-71461484	0	0	0.00605653	0	0	0	0	0	0
Atic	chr1:71603729-71625977	119.797	121.191	105.904	92.4234	70.0211	72.3475	140.018	147.678	119.717
Fn1	chr1:71632046-71699808	47.6034	25.6415	5.68901	0.630778	0.872895	1.98761	0.0497815	0.0758514	0.10271
Apol7d	chr1:71699908-71709417	0.0569557	0	0	0	0	0	0	0	0
Gm8883	chr1:71934685-71937778	0.0691154	0.0663675	0.0993357	0	0	0	0	0	0
4933417E11Rik	chr1:72005571-72051769	0	0	0	0.0603564	0	0	0	0	0
Mreg	chr1:72205806-72258881	16.4141	18.3845	13.2975	50.4458	73.7381	48.0623	45.063	54.2989	37.9151
Pecr	chr1:72305746-72330888	3.27295	3.80447	4.06011	8.91546	9.26639	10.6386	11.2438	12.4485	13.2124
Tmem169	chr1:72330946-72349569	0	0	0	0	0	0	0	0.0193271	0.0566256
Xrcc5	chr1:72353994-72441527	0.790339	0.528942	0.313602	2.32697	3.36356	1.94419	4.45757	7.40208	8.75865
2018-03-04	chr1:72473685-72583138	0.0527202	0.0099863	0.0155864	0.0185235	0.0134228	0.0389442	0.0143951	0.0561991	0.0281053
Smarcal1	chr1:72629824-72683364	5.29471	5.93157	5.68687	5.59567	6.02992	5.42019	5.97129	6.09959	6.8653
Ankar	chr1:72689553-72747138	0	0	0	0	0	0.0246267	0.0124984	0	0.0112802
Rpl37a	chr1:72757833-72760387	510.033	550.182	607.536	591.541	490.655	538.024	588.838	617.562	551.468
Igfbp2	chr1:72871053-72899045	0	0	0	0	0	0	0	0	0
Igfbp5	chr1:72904638-72921439	0.00996987	0	0	0	0	0	0.0483233	0.0267945	0
Tnp1	chr1:73061648-73062473	0	0	0	0	0	0	0	0	0
1700027A15Rik	chr1:73062609-73072082	0	0	0	0	0	0	0	0	0
Pinc	chr1:73437958-73454143	0	0	0	0	0	0	0	0	0
D530049I02Rik	chr1:73445541-73477353	0	0	0	0	0	0	0	0	0
6030407O03Rik	chr1:73664954-73911040	0	0	0	0	0	0	0	0	0
Mir6351	chr1:73902050-73902149	0	0	0	0	0	0	0	0	0
Tns1	chr1:73956804-74171023	8.93636	3.77478	1.37873	3.47355	2.02608	2.42893	0.258918	0.47336	2.65695
Rufy4	chr1:74172114-74194804	0.053577	0.0771798	0.421063	0	0.0467361	0	0.12987	0.168033	0.369855
Cxcr2	chr1:74200567-74207820	1.23204	1.42677	2.43198	1.05561	2.845	2.06892	0.871316	0.7989	0.603834
Cxcr1	chr1:74238359-74241205	0.0612273	0	0.213793	0.174968	0.0534096	0	0.059353	0	0.0535682
Mir1928	chr1:74253127-74253194	0	0	0	0	0	0	0	0	0
Arpc2	chr1:74283123-74314787	440.728	441.999	397.899	457.183	478.143	469.611	356.442	358.963	343.742
Gpbar1	chr1:74325173-74326163	0.0716654	0	0	0	0.0625149	0.136886	0.0694715	0.0642015	0.125401
Aamp	chr1:74326413-74331312	69.1354	69.1386	83.5215	58.9375	54.7943	60.761	59.4752	57.9012	62.0477
Pnkd	chr1:74331607-74400266	14.8166	12.63	12.4958	15.0811	9.40676	13.1382	10.1557	9.54496	10.2755
Tmbim1	chr1:74334820-74350910	18.1967	15.3919	11.5865	21.259	16.1301	18.3753	23.3466	21.6954	27.135
Catip	chr1:74408681-74415895	0.118776	0.0570269	0.0259213	0	0.0518052	0.0283589	0.028785	0.0266014	0.0259795
Slc11a1	chr1:74421776-74432625	8.23839	4.52148	2.59061	23.4896	21.338	25.3456	3.08533	4.30889	6.83039
Ctdsp1	chr1:74438182-74443859	45.1601	43.8063	33.4192	52.5516	58.1165	55.763	39.9773	39.201	52.2723
Mir26b	chr1:74440883-74440968	0	64.3617	0	63.8466	0	0	0	0	0
Vil1	chr1:74455957-74482134	0.0773493	0.0557056	0	0.0736798	0.0843414	0.0554036	0	0.10394	1.38731
Usp37	chr1:74482083-74590860	7.25069	7.34149	7.5391	7.95807	8.12398	7.31323	7.26302	7.77299	7.09082
Rqcd1	chr1:74552633-74577416	44.0961	44.9044	43.5763	41.4083	39.8619	37.8265	37.9134	41.1351	41.7346
Plcd4	chr1:74589462-74612551	0	0	0.0708291	0	0.0194199	0.0193723	0	0	0.0194776
Zfp142	chr1:74611701-74634602	3.65043	2.87271	3.46403	4.12693	3.90098	4.02664	3.34334	3.19387	3.03783
Bcs1l	chr1:74634862-74639017	10.5083	11.1674	13.4051	8.16652	7.23416	7.58344	9.538	10.4286	11.6823
Rnf25	chr1:74640321-74647971	14.1426	15.918	17.1711	16.0847	15.7716	17.6486	15.1231	15.6817	14.0742
Stk36	chr1:74648028-74683467	0.0783913	0.118289	0.117311	0.106675	0.0488443	0.128343	0.0325678	0.0501621	0.0783829
Ttll4	chr1:74708327-74744547	12.8269	12.9581	13.4439	13.5833	11.9536	10.7222	28.1051	25.0259	18.7809
Cyp27a1	chr1:74760147-74784464	2.53917	3.11194	0.933289	3.05521	2.01095	1.78684	7.09283	1.82576	1.9
Prkag3	chr1:74785495-74795529	0.0214344	0	0.0187111	0	0	0.00341178	0.0623347	0	0
Wnt6	chr1:74818465-74831893	0.181318	0.0870548	0.0263802	0.230288	0.210889	0.115444	0.0292946	0.0270723	0
Wnt10a	chr1:74838592-74850749	0	0	0	0	0	0	0	0	0
Cdk5r2	chr1:74901602-74904306	0	0	0	0	0	0	0	0	0
Fev	chr1:74928082-74931982	0	0	0	0	0	0	0	0	0
Cryba2	chr1:74936507-74939717	0	0	0	0	0	0	0	0	0
Mir375	chr1:74947231-74947295	0	0	0	0	0	0	0	0	0
Ccdc108	chr1:74948653-74982173	0	0	0	0	0	0.00975645	0	0	0
Ihh	chr1:74991891-74998225	0.0251471	0	0.0658564	0	0.0438726	0.0720494	0.0243773	0.0450562	0.0440028
Nhej1	chr1:75013919-75121800	6.13939	6.85329	6.56522	6.79846	6.82826	6.88943	6.02584	5.43123	4.69997
Slc23a3	chr1:75122115-75130464	0.151913	0.0875243	0.0265225	0.086824	0.132517	0.116066	0.206168	0.0544367	0.106328
Cnppd1	chr1:75131788-75138942	17.3613	17.3968	14.8256	25.8758	27.5355	30.6986	15.2783	14.6769	13.3807
Fam134a	chr1:75139359-75144483	34.6154	35.6388	31.3208	44.3194	50.5799	53.6955	30.5963	25.6118	29.4292
Zfand2b	chr1:75165219-75168200	14.9291	14.3368	15.7982	17.3467	18.6005	23.5441	12.3352	12.7674	16.3324
Abcb6	chr1:75168214-75176857	7.51337	6.99664	6.54076	12.564	10.6413	15.4747	8.84409	5.43646	7.29586
Atg9a	chr1:75177434-75188584	25.2987	24.0031	22.0404	24.3501	30.3359	27.6242	20.0548	13.3254	22.5505
Ankzf1	chr1:75188733-75195960	10.0273	12.0189	11.3295	10.642	11.3407	9.83902	10.6486	10.9585	10.3204
Glb1l	chr1:75194809-75207353	5.72491	6.64675	5.05813	3.78427	6.43159	8.54919	5.39831	3.85427	4.41682
Stk16	chr1:75207403-75212181	42.1713	47.9004	42.5966	37.2203	42.8674	40.3995	51.7836	43.1697	49.204
Tuba4a	chr1:75211548-75215828	311.275	392.423	334.183	347.074	420.496	416.14	434.626	421.988	393.878
A630095N17Rik	chr1:75216669-75228668	0	0	0	0	0	0	0	0	0.11099
Dnajb2	chr1:75232997-75242267	5.70852	5.98231	5.71687	3.65887	5.57545	4.60216	4.09863	3.57271	3.89449
Ptprn	chr1:75243615-75260783	0	0.0162384	0	0.032217	0	0.0161504	0.0163931	0.0151495	0.044386
Resp18	chr1:75268776-75274955	0	0	0	0	0	0	0	0	0
Dnpep	chr1:75305139-75314212	25.1498	24.3621	30.0605	31.855	30.6301	36.4192	11.9205	17.0986	19.0278
Des	chr1:75356866-75365154	0.0196888	0	0.0343746	0	0	0	0	0	0
Gm15179	chr1:75364784-75371590	0.11934	0	0	0	0	0	0	0	0
Speg	chr1:75371871-75428881	0.491654	0.322499	0.0408408	0.805136	0.29044	0.415568	0.278498	0.382246	0.0409324
Gmppa	chr1:75432517-75439751	27.1436	26.1462	28.0774	29.4627	30.7292	32.7493	14.3524	16.1603	17.3086
Asic4	chr1:75447084-75470915	0	0	0	0	0	0	0	0	0
Chpf	chr1:75471143-75476046	0.565633	0.618062	0.595928	1.02186	2.00769	1.67649	0.567225	0.646509	0.221839
Tmem198	chr1:75476106-75482268	0	0.0546088	0.0496444	0	0.148826	0.0543128	0.0551289	0.0509468	0.0497558
Obsl1	chr1:75482399-75503027	0	0	0	0	0	0	0	0	0
Inha	chr1:75503651-75506929	0	0	0	0	0	0	0	0	0
Stk11ip	chr1:75518103-75533910	8.15682	7.18406	6.72746	9.09426	8.33973	8.39709	4.18461	5.5991	5.57246
Slc4a3	chr1:75542840-75556006	0.0132947	0	0	0.012664	0	0.012697	0.0257755	0.0119101	0
Gm17751	chr1:76485707-76498603	0	0	0	0	0	0	0	0	0
Mir6343	chr1:76506134-76506218	0	0	0	0	0	0	0	0	0
Epha4	chr1:77363759-77511663	0	0	0	0	0	0	0	0	0
Mir6352	chr1:77493227-77493343	0	0	0	0	0	0	0	0	0
Pax3	chr1:78097841-78193711	0.126511	0.121979	0.141241	0.108472	0.163846	0.126513	0.104866	0.160535	0.160147
Sgpp2	chr1:78306920-78416861	0.148471	0.120589	0.102606	0.167355	0.118387	0.056718	0.0935515	0.0864548	0.240744
Farsb	chr1:78414532-78485472	50.1189	54.928	53.2376	47.4495	38.8839	37.7127	68.0914	67.2231	58.0954
Mogat1	chr1:78507634-78534748	0	0	0	0	0	0.0536891	0	0	0
Utp14b	chr1:78654399-78664176	9.22679	8.99565	6.96055	7.07935	5.78874	4.66928	8.09347	6.89952	8.80489
Acsl3	chr1:78654399-78704318	20.1558	19.801	19.457	14.3348	10.7368	9.32551	21.8646	20.6896	25.9447
Kcne4	chr1:78813523-78816600	0	0	0	0	0	0	0	0	0
Scg2	chr1:79431243-79436665	0	0	0	0	0	0.0471695	0	0	0
Ap1s3	chr1:79603450-79668547	7.55472	8.36791	15.8115	10.9972	11.1189	11.1671	13.8953	12.841	13.198
Wdfy1	chr1:79698836-79758344	3.87236	5.70683	6.28158	7.99373	10.866	11.5046	11.2448	9.24487	8.64203
Mrpl44	chr1:79772592-79778020	34.998	35.5574	29.8663	33.3817	36.45	36.7316	51.6061	52.3653	44.7989
Serpine2	chr1:79790895-79855240	1.18685	1.43188	0.345351	7.07313	10.8043	19.0076	18.4967	18.8384	14.1646
Fam124b	chr1:80195273-80210519	0	0	0	0	0	0	0	0.0189853	0
Cul3	chr1:80263392-80337005	69.7739	69.5776	73.6824	66.5686	67.8709	65.2497	66.1235	66.0749	66.821
1700016L21Rik	chr1:80442506-80472235	0	0	0	0	0	0	0	0	0
Dock10	chr1:80497642-80755128	37.8346	29.3272	18.9518	37.9715	28.0119	25.4177	19.324	17.8865	19.5149
Nyap2	chr1:81073891-81268226	0	0	0	0	0	0	0	0	0
Mir6344	chr1:82128490-82128594	0	0	0	0	0	0	0	0	0
Irs1	chr1:82229679-82288014	0.00628751	0	0	0	0	0	0	0	0
Rhbdd1	chr1:82313153-82441941	8.57302	8.11762	6.79939	7.35455	10.0653	8.17127	6.2288	7.72595	8.6637
Col4a4	chr1:82447297-82583424	0	0	0	0.00705648	0.00646205	0	0.00718114	0.00663639	0.0129625
Col4a3	chr1:82583495-82718634	0	0.00643549	0.0117009	0	0	0	0	0	0
Mff	chr1:82721492-82748964	27.7408	26.0518	27.0287	29.2998	30.8254	33.6837	25.5109	26.158	27.8608
Tm4sf20	chr1:82753223-82765031	0	0	0	0	0	0	0	0	0.0379391
Agfg1	chr1:82836057-82892850	41.6951	40.314	40.8237	38.1986	38.566	38.1512	43.1555	41.6539	44.1919
Slc19a3	chr1:83009097-83035023	0	0	0	0	0	0	0	0	0
Ccl20	chr1:83113340-83115742	0	0	0	0.0899543	0	0	0	0	0
Daw1	chr1:83156336-83207147	0	0	0	0	0	0	0	0	0
Sphkap	chr1:83252355-83404775	0	0	0	0	0	0	0	0	0
Pid1	chr1:84032867-84281220	1.30361	0.768637	0.25954	2.96281	2.49377	3.0142	0.310383	0.286838	0.440207
Mir6353	chr1:84215423-84215536	0	0	0	0	0	0	0	0	0
Dner	chr1:84366413-84692796	0.0164322	0	0.0143445	0.0626107	0.0430024	0.0156934	0.0159292	0	0
Mir5126	chr1:84692413-84692490	0	0	0	0	0	0	0	0	0
Trip12	chr1:84717763-84835879	62.5973	60.9348	57.7162	55.843	57.4686	48.382	51.1564	52.5988	60.3914
Fbxo36	chr1:84836415-84897061	1.94237	2.6423	1.97819	1.38767	1.90616	1.46857	1.88291	1.16005	2.76152
Slc16a14	chr1:84903279-84931658	0.0525217	0.0252168	0.0229244	0.350211	0.229078	0.250801	0.203656	0.188207	0.0689274
A530032D15Rik	chr1:85084713-85106428	1.41186	1.16453	1.73284	0.965553	1.33685	1.22737	7.53919	2.98366	1.50974
Gm7609	chr1:85196185-85210337	4.91097	4.7798	4.71029	3.33476	5.66456	5.20634	3.44758	3.96015	3.80918
C130026I21Rik	chr1:85242918-85267141	3.955	4.56903	4.71458	1.85446	4.00617	2.36007	27.3773	8.56825	4.33701
Sp110	chr1:87473474-87500466	40.2226	43.4881	60.1116	25.6465	40.7197	34.8754	34.4173	30.4445	32.9717
Sp140	chr1:87497277-87541611	19.7612	25.5779	33.7414	16.2282	28.5412	21.025	29.7671	23.5205	29.0567
Sp100	chr1:87546624-87606023	32.0133	32.609	33.4823	24.7828	42.7499	35.9563	8.04825	9.47793	11.148
A630001G21Rik	chr1:87613657-87633181	8.03313	7.40146	7.06928	8.27163	8.70965	8.94542	4.88671	4.54515	4.4958
Mir8096	chr1:87648522-87648649	0	0	0	0	0	0	0	0	0
9930111H07Rik	chr1:87671845-87681269	1.08032	1.69486	1.4903	1.94218	2.15022	1.94724	1.25375	1.21316	1.3978
Cab39	chr1:87690021-87748152	71.7279	76.4724	78.4359	72.8463	83.4625	76.2523	83.0924	79.3852	87.9314
Itm2c	chr1:87791084-87805273	65.1503	53.8225	37.0146	85.026	49.4072	70.4974	12.9012	11.4235	14.9203
4933407L21Rik	chr1:87825057-87828331	0	0.0572984	0	0	0	0	0	0	0.0522063
Gpr55	chr1:87836111-87857630	0.312142	0.391957	0.607848	0.731898	1.19387	0.34397	0.488793	0.301143	0.273095
Spata3	chr1:87918516-87926533	0	0	0	0	0	0	0	0	0
2810459M11Rik	chr1:87942437-87952031	0	0	0	0	0	0	0	0	0
Psmd1	chr1:87961193-88035870	111.349	112.221	111.831	95.3244	90.2085	88.698	112.073	114.087	104.622
Htr2b	chr1:87995611-88008545	0.12062	0.202693	0.157942	0.201071	0.0526094	0.0575983	0.0584637	0.0810431	0.18468
Armc9	chr1:88051354-88174859	1.17919	0.90995	1.15604	1.09581	1.45566	1.20861	1.25476	1.39151	0.931243
B3gnt7	chr1:88199795-88203880	0.565416	0.452448	3.02317	0.471269	1.29471	1.73248	1.96405	1.16079	0.556522
Ncl	chr1:88241293-88256030	295.145	319.717	339.87	198.094	162.494	158.616	594.187	557.887	434.003
Snora75	chr1:88247744-88247860	16.2441	31.1965	14.1802	30.9469	42.51	31.0274	0	72.7614	28.4241
Gm24148	chr1:88248555-88248702	0	0	0	0	0	0	0	0	0
Snord82	chr1:88252834-88252902	0	0	0	0	0	0	0	0	0
C130036L24Rik	chr1:88256148-88264539	0.636488	1.17143	0.972337	0.404195	0.786561	0.810494	2.36518	1.75811	1.02092
Nmur1	chr1:88282899-88284716	0	0.0533429	0.096987	0.0529161	0.096917	0.0530537	0.323105	0.248829	0.0486023
1700019O17Rik	chr1:88322903-88324624	0	0	0	0	0	0	0	0	0
Ptma	chr1:88423310-88427273	2655.25	2801.35	3167.13	2206.88	1981.36	2059.45	2919.33	2869.03	2747.21
Pde6d	chr1:88439589-88479076	32.6049	33.8669	58.3645	25.922	27.7225	27.504	12.2984	13.1271	17.4265
Cops7b	chr1:88483674-88503075	11.8384	14.0629	13.8033	11.9915	11.345	11.2796	14.978	15.1115	14.0774
Nppc	chr1:88562867-88567148	0	0	0	0	0	0	0	0	0
Dis3l2	chr1:88600378-88946672	8.43405	8.28456	6.84216	8.18159	8.43313	8.22126	6.30993	7.41848	7.12709
Alppl2	chr1:88983265-88986503	0	0	0	0	0	0	0	0	0.0774891
Alpi	chr1:88994576-88998181	0.158452	0	0	0	0	0	0	0	0
Akp3	chr1:89021582-89024487	0	0	0	0	0	0	0	0	0
Ecel1	chr1:89044229-89052931	0	0.0608215	0	0	0	0	0	0	0
Prss56	chr1:89080067-89084979	0	0	0	0	0	0	0	0	0
Chrnd	chr1:89087171-89096645	0	0	0.0178098	0	0	0	0	0	0
Chrng	chr1:89102385-89108410	0.0656138	0	0.0286387	0	0	0	0.0318026	0	0
Eif4e2	chr1:89110488-89137063	52.2499	53.7236	56.2096	47.7536	43.5326	46.5268	53.5554	60.2013	52.8597
Efhd1	chr1:89160938-89207366	0	0	0	0	0.0306915	0	0	0.0315195	0.0307826
Gigyf2	chr1:89223572-89347385	21.4081	19.3207	18.0428	20.6597	20.4564	18.8386	20.4474	21.9979	19.5627
Kcnj13	chr1:89282858-89291304	0.196783	0.14172	0.171782	0.140586	0.214572	0	0.190759	0.220361	0.0430418
3110079O15Rik	chr1:89366838-89372034	0	0	0	0	0	0	0	0	0
Ngef	chr1:89373403-89470445	0	0	0	0	0.019291	0	0	0	0
Neu2	chr1:89470601-89494415	0	0	0	0	0	0	0	0	0
Inpp5d	chr1:89516886-89617085	49.9199	47.4085	43.9187	56.095	58.9375	54.0736	39.6057	36.5449	39.1367
Atg16l1	chr1:89652585-89689003	8.39821	8.52454	9.34317	10.5541	9.55662	9.74268	9.76178	10.7503	8.75314
Scarna6	chr1:89681145-89681393	0	0.943223	0.857475	0	0	0	0	0	0
Sag	chr1:89700254-89741732	0.148823	0.178633	0.0324786	0.177203	0.194731	0.24873	0.180334	0.199984	0
Dgkd	chr1:89749861-89841064	24.4609	21.843	28.7603	21.0623	16.8535	16.4037	28.904	25.8933	26.0959
Usp40	chr1:89841695-89905126	1.36638	1.4398	1.61602	1.60606	1.19191	1.41026	1.96625	1.9052	1.82383
Ugt1a10	chr1:89951985-90116577	0.0117994	3.9981e-08	1.50214e-13	0.0176072	2.89853e-08	0.0119747	0.0119111	2.49979e-08	7.02212e-09
Ugt1a9	chr1:89967353-90116577	0.0119952	4.9975e-08	2.19123e-13	3.36772e-08	3.65429e-08	0.0121861	0.0121171	3.12466e-08	9.00632e-09
Ugt1a7c	chr1:89991575-90116577	32.1991	27.9259	22.263	35.7047	36.4095	48.2022	19.4332	19.7115	13.9929
Ugt1a6b	chr1:89999831-90115573	0.697247	0.47785	1.71966e-06	0.834965	0.597944	0.824704	0.187842	0.198676	0.088252
Ugt1a6a	chr1:90031383-90116577	0.579917	0.249301	6.36185e-14	0.508218	0.28826	0.466308	0.137537	0.0463347	0.125986
Ugt1a5	chr1:90062586-90116577	8.71161e-08	5.35471e-08	2.46279e-13	3.62765e-08	0.0161058	3.90991e-08	3.52738e-08	3.348e-08	9.72724e-09
Ugt1a2	chr1:90097185-90116577	8.85764e-08	5.44809e-08	2.5359e-13	3.69582e-08	0.0161269	3.98604e-08	3.59128e-08	3.40639e-08	9.91663e-09
Ugt1a1	chr1:90108533-90116577	0.142757	0.0348001	1.81352e-13	0.0710341	0.127098	0.108715	0.0360395	0.0323335	7.95045e-09
Dnajb3	chr1:90101306-90102323	0.0692854	0.133062	0	0	0.0604388	0	0	0	0
Mroh2a	chr1:90123594-90158864	0.0926223	0.118587	0.0404272	0.0955806	0.107728	0.206401	0.157127	0.131378	0.101295
Hjurp	chr1:90155430-90174154	13.0422	13.2824	9.80572	11.4523	13.5775	13.892	7.44877	8.64703	8.00974
6430706D22Rik	chr1:90159687-90165983	57.1934	62.4658	45.355	61.0641	61.2986	66.8079	37.0862	38.1945	42.91
A730008H23Rik	chr1:90161402-90174132	26.3509	24.9647	19.2845	28.3443	25.475	24.1582	18.1038	18.0938	18.3053
Trpm8	chr1:90203286-90285426	0	0	0	0	0	0	0	0	0
Spp2	chr1:90303593-90323013	0	0	0	0	0	0	0	0	0
Glrp1	chr1:90396445-90406641	7.3585	7.71392	8.58348	3.88731	3.64394	3.74399	5.48231	6.44819	5.11666
Gm19589	chr1:90448091-90458741	0.0232959	0.00559244	0.0457563	0	0.00508036	0	0	0.0260871	0.0407636
Arl4c	chr1:90594800-90598766	4.0428	2.01293	4.41798	10.0839	13.1137	15.0437	0.435449	0.751177	0.366808
Platr5	chr1:90651464-90652308	0	0	0	0	0.180644	0	0.200746	0	0.18118
1700067G17Rik	chr1:90912687-90918785	0	0	0	0	0	0	0	0	0
Sh3bp4	chr1:90967036-91050368	0.016238	0.0935547	0.283499	0.046403	0	0	0.0157409	0.0290937	0
C030007H22Rik	chr1:91256916-91302708	0	0	0	0	0	0	0	0	0
Agap1	chr1:91351385-91791857	0.162196	0.234713	0.11202	1.32756	3.54415	2.80772	0.624754	0.220645	0.0213826
4933400F21Rik	chr1:91573081-91580467	0	0	0	0	0.0144225	0	0	0	0
Gbx2	chr1:91824536-91827751	0.0879233	0.0281426	0.486099	0	0.127828	0.22392	0	0	0
Asb18	chr1:91849252-91911152	0	0	0	0	0	0	0	0	0
Iqca	chr1:91938706-92049976	0	0	0	0.0178501	0	0.0178965	0	0	0
Ackr3	chr1:92100554-92112297	0	0	0	0	0	0	0	0	0
Cops8	chr1:92499999-92509916	32.5123	34.4209	35.4319	37.7466	38.1345	37.615	46.4759	38.1781	33.8576
Col6a3	chr1:92663434-92740548	3.25137	1.67482	1.07085	1.12326	0.852362	0.243965	0.223076	0.075915	0.352223
Mlph	chr1:92811676-92847719	1.55302	0.84674	0.786996	1.54202	0.702236	0.515345	0.446539	0.463757	1.33763
Prlh	chr1:92849684-92850589	0	0	0	0	0	0	0	0	0
Rab17	chr1:92854709-92866197	0.539881	0.279429	0.326606	1.30809	1.77601	1.07244	0.0402966	0.0744818	0.545566
Lrrfip1	chr1:92895303-93025521	77.8357	73.5607	71.3968	67.3688	66.5758	59.1244	60.6795	51.6223	52.4194
Rbm44	chr1:93041679-93067372	0.0463365	0.10382	0.0539324	0.0147127	0.0134734	0.014751	0.0299453	0	0.0270267
Ramp1	chr1:93076398-93121773	25.8731	21.4947	10.8901	26.023	29.43	31.9624	5.07632	5.25074	8.665
Ube2f	chr1:93146895-93182602	42.6722	40.7657	39.0325	46.5506	44.7066	42.7495	44.0514	36.5517	43.4786
Scly	chr1:93194914-93217657	44.4899	40.6418	20.9162	49.3175	51.4187	50.4664	9.59611	10.934	21.3076
Espnl	chr1:93218651-93244880	1.86045	1.2082	1.62408	0.450731	0.150095	0.328657	0.416994	0.240851	0.047044
Klhl30	chr1:93247649-93258981	0.0600103	0.0576244	0	0	0	0	0	0	0
Fam132b	chr1:93263006-93270794	0.539349	1.0151	1.86446	0.390459	0.395206	0.412079	2.15409	2.1453	2.01965
Ilkap	chr1:93272407-93295360	44.3037	43.5414	49.2781	33.0516	34.6998	35.5871	47.9904	49.4872	45.3453
1700020N18Rik	chr1:93301456-93302606	0.329402	0	0	0	0.143672	0	0	0	0
Hes6	chr1:93308059-93309799	42.0353	43.1379	43.1727	24.8596	23.7213	26.3988	32.3477	36.7204	33.0295
Per2	chr1:93312558-93355905	3.44999	4.22505	5.64795	2.58143	3.75095	2.48309	2.46223	2.72338	2.91343
Traf3ip1	chr1:93391244-93425884	3.52061	3.13447	2.93903	2.55589	2.23623	2.7584	3.41283	3.07738	3.00544
Asb1	chr1:93437141-93456167	3.43914	4.23483	5.79259	3.41067	4.82572	4.13485	1.77356	1.88459	1.99134
Twist2	chr1:93698053-93744604	0	0.0488175	0	0	0	0	0	0	0
Hdac4	chr1:93829331-94044970	8.06865	7.82027	6.33257	10.7171	12.0114	9.62152	5.13158	5.36381	6.72944
Ndufa10	chr1:94336295-94370335	88.0529	88.804	83.9112	90.9765	74.6099	79.865	94.3223	100.021	94.1521
Mir6900	chr1:94361059-94361119	0	0	0	0	0	0	0	0	0
Olfr1416	chr1:94376257-94377196	0	0	0	0	0	0	0	0	0
Olfr1415	chr1:94387394-94388330	0	0	0	0	0	0	0	0	0
Olfr1414	chr1:94407624-94415092	0	0	0	0	0	0	0	0	0
Olfr1413	chr1:94469701-94470783	0	0	0	0	0	0	0	0	0
Olfr1412	chr1:94484908-94485874	0	0	0	0	0	0	0	0	0
Olfr1411	chr1:94493097-94494069	0	0	0	0	0	0	0	0	0
Olfr1410	chr1:94504415-94505384	0	0	0	0	0	0	0	0	0
Olfr12	chr1:94516457-94517578	0	0	0	0	0	0	0	0	0
Myeov2	chr1:94533721-94538562	78.087	79.2312	77.2525	89.8984	68.3615	88.167	55.6046	53.4794	51.1761
Otos	chr1:94540794-94545418	1.01391	1.18996	0.590061	0.965811	1.081	1.61387	0.218416	0.100924	0.0985642
Gpc1	chr1:94728262-94756773	4.91286	3.45738	1.20435	1.202	3.99204	1.43009	11.2048	5.38091	5.29927
Mir149	chr1:94746954-94747020	0	0	0	0	0	0	0	0	0
Ankmy1	chr1:94766705-94799483	0	0.0355973	0.0485418	0.0353125	0.0323378	0.0177022	0.0359363	0.0166051	0.0324338
Dusp28	chr1:94803565-94805197	2.23216	2.05936	2.06318	3.75224	4.00885	4.4726	2.80025	2.43099	2.18269
Rnpepl1	chr1:94807401-94817162	18.6971	16.1412	10.4416	23.4881	28.7891	27.9896	12.3271	12.9584	14.8458
9430060I03Rik	chr1:94830119-94847167	0.153486	0.221076	0.133985	0.0365512	0.0334721	0.0732925	0.0371969	0	0
Capn10	chr1:94830984-94844525	3.89861	4.14833	4.43346	4.47646	4.22805	4.50823	4.06526	4.0023	4.48029
Gpr35	chr1:94869695-94882968	0.457913	0.369579	0.342568	0.693175	0.56286	0.538964	0.468204	0.3786	0.617177
Aqp12	chr1:94902910-94908846	0	0	0	0	0	0	0	0	0
Kif1a	chr1:94912031-94998451	0.262026	0.217607	0.0370878	0.229357	0.0494164	0.0541018	0.0480502	0.0634383	0.147112
Agxt	chr1:95031816-95041998	0	0	0	0	0	0	0	0	0
2310007B03Rik	chr1:95047931-95057525	0	0	0	0	0	0	0	0	0
Sned1	chr1:95132473-95193025	0.0527679	0.05067	0.0460636	0.0628307	0.126583	0.0377965	0.319703	0.259997	0.103876
Mir6901	chr1:95171125-95171187	0	0	0	0	0	0	0	0	0
Mterf4	chr1:95195787-95202447	4.74393	5.18125	5.53214	4.05319	4.28037	4.16749	6.42415	5.5313	5.38614
Pask	chr1:95206013-95239365	3.54138	4.18195	4.48209	3.39521	3.72904	3.43688	4.16623	3.58324	3.90055
Ppp1r7	chr1:95240221-95264195	20.4748	19.5322	21.9961	16.7312	15.0165	14.569	21.0744	23.3239	20.7135
Mir6902	chr1:95242668-95242732	0	0	0	0	0	0	0	0	0
Mir6345	chr1:95248734-95248862	0	0	0	0	0	0	0	0	0
Ano7	chr1:95270472-95300881	0.4285	0.498372	0.373794	0.984571	1.28801	0.860188	2.63366	1.26984	0.133374
Hdlbp	chr1:95302516-95375494	147.544	150.141	129.932	175.155	167.364	179.005	127.975	135.326	124.359
2018-09-02	chr1:95375569-95406309	76.1353	75.8274	63.1364	84.2655	70.6225	77.442	55.7451	59.3714	53.8089
Farp2	chr1:95408680-95518553	1.04821	1.06488	0.384578	1.05636	0.728844	0.565826	1.0603	1.21122	0.637971
Stk25	chr1:95517327-95532304	14.2394	14.2408	13.849	17.8389	16.3523	17.4972	9.88266	10.5393	13.5408
Bok	chr1:95582270-95592339	0.0458708	0	0.0400428	0.0436946	0.200069	0.26285	0.1334	0.0821867	0.642122
Thap4	chr1:95601967-95651415	13.6216	13.6331	16.1144	11.6038	11.4051	12.4866	16.08	16.176	17.9142
Atg4b	chr1:95651609-95686106	12.4088	12.4447	14.6628	13.4532	13.4237	14.2484	11.1387	13.1277	16.0349
Dtymk	chr1:95689152-95698511	82.4334	88.3754	103.622	68.0464	68.3357	78.6833	79.3771	87.6864	69.2301
Ing5	chr1:95700541-95718677	6.00469	6.32758	7.72652	7.87405	8.53725	8.18002	6.41304	7.60322	8.31243
D2hgdh	chr1:95721816-95748751	6.09876	6.34905	6.37489	4.58738	5.78491	6.20154	4.0753	5.32213	6.61368
Gal3st2	chr1:95757920-95773071	0	0	0	0	0	0	0	0	0
Gm9994	chr1:95815013-95837816	0	0	0	0	0	0	0	0	0
Gm6086	chr1:95887085-95908116	0.0487071	0.0514477	0.0425187	0.0185585	0.0254928	0.0651239	0.0519376	0.0349074	0.0340913
Neu4	chr1:95917069-95924907	0	0	0	0	0	0	0	0	0
Pdcd1	chr1:95934881-95949130	0	0.0313383	0	0	0	0	0	0	0
4930440C22Rik	chr1:96694018-96699049	0	0	0	0	0	0	0	0	0
Fam174a	chr1:97210204-97231861	9.32412	8.29968	6.53741	11.2503	9.19225	10.2618	3.84503	4.64057	5.309
St8sia4	chr1:97484258-97564171	25.8004	21.3626	19.9757	24.6105	21.362	25.7543	3.96792	2.8385	2.31095
4930598F16Rik	chr1:97597760-97613095	0	0	0	0	0	0	0	0	0
1700063A18Rik	chr1:97887235-97918335	0	0	0	0	0	0	0	0	0
4930533P14Rik	chr1:98508633-98559150	0	0	0	0	0	0	0	0	0
Slco4c1	chr1:98715360-98768748	0.128606	0.469275	0.785866	0.637027	2.93926	1.52302	0.972421	2.02773	1.73279
Panct2	chr1:98767702-98777811	1.82987	2.41947	2.70276	1.86782	3.46617	2.48242	1.47801	2.54829	3.63552
Slco6b1	chr1:98802752-98894137	0	0	0	0	0	0	0	0	0
Slco6c1	chr1:98956025-99024880	0	0	0	0	0	0	0	0	0
D1Ertd622e	chr1:99540478-99558595	19.0729	17.9731	20.8606	22.6572	20.1087	21.039	22.9282	29.991	25.789
Ppip5k2	chr1:99602619-99666669	28.3539	29.4552	29.6193	24.3779	24.4038	23.8797	18.6395	31.9204	30.9445
Gin1	chr1:99666755-99689548	6.77671	7.0373	8.48544	6.7181	6.98139	7.78985	4.2507	6.9225	8.0484
Pam	chr1:99717670-99992209	5.7211	6.25665	7.01209	8.73877	10.3719	9.18923	5.71402	6.52305	4.82847
B230216N24Rik	chr1:99927699-99944370	0.115666	0.0555335	0.10097	0.330535	0.302691	0.110465	0.168187	0.103619	0.151795
1810006J02Rik	chr1:100028043-100041232	2.62086	4.63211	2.32103	9.66045	13.1209	10.9915	3.53478	1.12291	0.0996958
Slco6d1	chr1:100317700-100405957	0	0	0	0	0	0	0	0	0
Cntnap5b	chr1:101669341-102382519	0	0	0	0	0	0	0	0	0
Gm20268	chr1:103052344-103071779	0	0	0	0	0	0	0	0	0
Cdh20	chr1:106665395-106892058	0	0	0.0295081	0	0	0	0	0.00430327	0
Rnf152	chr1:107173493-107253287	0.377725	0.369303	0.203834	0.0196216	0.0239596	0.0327907	0.0199682	0.024606	0
Pign	chr1:107414998-107560253	9.25547	9.32364	10.6007	9.43679	8.16341	7.66893	7.23586	8.49113	8.61502
2310035C23Rik	chr1:107560437-107651708	6.95216	7.08685	7.92997	6.14833	6.58388	5.66421	6.26008	6.3461	5.5152
Tnfrsf11a	chr1:107677299-107744558	0.38582	0.210501	0.088793	0.355823	0.219272	0.104215	0.0623349	0.164963	0.0767174
Zcchc2	chr1:107886982-107930654	9.07083	8.66804	9.38542	9.16091	11.0076	9.43946	8.26447	9.45983	8.79666
Gm20753	chr1:108049201-108068101	0	0	0	0	0	0	0	0.14798	0
Phlpp1	chr1:108068445-108290822	1.2889	1.43018	4.55892	0.618425	0.749554	0.692979	0.721902	1.52245	0.142003
Bcl2	chr1:108434754-108610867	3.27877	2.29607	0.829384	5.02429	9.04487	8.49007	0.117913	0.109024	0.261778
Mir3473f	chr1:108443072-108443208	257.817	204.735	243.913	179.601	241.063	111.548	158.893	132.771	157.015
Kdsr	chr1:108616986-108656319	5.79917	5.77848	5.36349	6.47355	6.89063	7.13493	6.18583	6.64286	7.70247
Vps4b	chr1:108667364-108693302	44.9095	45.0458	42.6816	45.0351	44.6849	45.9238	34.244	35.38	37.6049
Serpinb5	chr1:108757756-108779925	0	0	0	0	0	0	0	0	0
Serpinb12	chr1:108831025-108853657	0.30387	0.11467	0.0347436	0.682556	0.397608	0.435317	0.038582	0.0713179	0
Serpinb13	chr1:108877560-108897772	0	0	0	0	0	0	0	0	0
Serpinb3a	chr1:108942163-108948880	0	0	0	0	0	0	0	0	0
Serpinb3d	chr1:108974769-108980057	0	0	0	0	0	0	0	0	0
Serpinb3b	chr1:109050537-109057691	0	0	0	0	0	0	0	0	0
Serpinb3c	chr1:109167777-109174948	0	0	0	0	0	0	0	0	0
Serpinb11	chr1:109258890-109277052	0.113036	0.144722	0	0.179455	0.131471	0.251891	0	0	0
Serpinb7	chr1:109319265-109349266	0	0	0	0	0	0	0	0	0
Serpinb2	chr1:109407999-109422177	1.35552	3.45086	16.1525	2.37212	13.4738	7.37569	2.0169	0.599362	1.85265
Serpinb10	chr1:109425579-109445848	0.453209	1.42617	8.17188	0.294468	1.7047	1.53918	12.6374	2.14155	4.76928
Serpinb8	chr1:109486582-109505555	0.654478	0.681479	4.23196	2.43972	2.69202	2.24484	0.836884	0.684514	1.14806
D830032E09Rik	chr1:109813835-109847524	0	0	0	0	0	0	0	0	0
Cdh7	chr1:111880313-112035578	0	0	0	0	0	0	0	0	0.0313009
Cdh19	chr1:112785771-112873949	0	0	0	0	0	0	0	0	0
Dsel	chr1:113755278-113761495	1.29703	1.1579	0.521893	0.897669	0.777855	0.445163	0.392915	0.835151	0.053193
Cntnap5a	chr1:117581713-118477251	0	0	0	0	0	0	0	0	0
Tsn	chr1:120195094-120207709	34.5528	35.6404	35.8519	35.4687	32.0129	34.0429	37.8288	38.5726	31.8124
Nifk	chr1:120218419-120230408	65.0622	71.9493	72.0132	51.0537	47.2473	49.2766	102.845	100.836	80.1359
Clasp1	chr1:120285634-120506039	13.8673	14.2937	18.8901	12.4974	14.5488	11.9669	24.991	28.4393	24.0722
2900060B14Rik	chr1:120355245-120355842	2.86657	4.95468	3.37819	0.136529	0.125028	0	0	0	0.752394
Tfcp2l1	chr1:120524521-120581745	0.0195275	0.00596628	0.0221691	0.00789139	0.046844	0.0104904	0.0321806	0.0204094	0.0332635
Gli2	chr1:120730637-120950196	0	0	0	0	0	0	0	0	0
Mir6346	chr1:120850796-120850876	0	0	0	0	0	0	0	0	0
Inhbb	chr1:121312041-121318825	0	0	0	0	0	0	0	0	0
Ralb	chr1:121366881-121401359	50.4058	49.3151	34.9404	57.721	52.7402	53.6411	40.8551	37.3907	37.1822
Tmem185b	chr1:121422730-121425560	8.77335	8.71292	8.72602	8.86796	7.87769	8.6452	11.0832	10.9919	7.43188
3830432H09Rik	chr1:121426056-121432742	0	0	0	0	0	0	0	0	0
Epb4.1l5	chr1:121441609-121545577	0.722759	0.970694	1.67364	0.4437	0.228425	0.383499	1.53582	1.72747	1.09582
Ptpn4	chr1:121554669-121733648	6.8942	5.21439	6.72824	5.95929	6.01393	4.44524	10.2006	9.37075	8.81231
Tmem177	chr1:121804477-121809745	1.9531	1.89298	2.21485	2.52117	2.91385	2.85894	1.39787	2.20755	2.09206
Cfap221	chr1:121820095-121891787	0	0	0	0	0	0	0.0236694	0	0
Sctr	chr1:121903556-121960109	0	0	0	0	0	0	0	0	0
Tmem37	chr1:121963953-121970357	1.52428	1.26409	2.66123	0	0.0604388	0.0661701	0.604479	0.310347	0.545564
Dbi	chr1:122009856-122017673	483.304	519.324	569.349	408.827	323.42	328.317	440.286	411.298	543.278
3110009E18Rik	chr1:122017763-122084766	3.496	2.4356	2.18911	2.57251	1.85099	1.47383	4.11393	3.97466	2.41953
Steap3	chr1:122122992-122167659	10.864	9.1175	8.13443	11.4634	8.16708	9.14167	18.5159	19.3065	11.6108
C1ql2	chr1:122237158-122239751	0	0	0	0	0	0	0	0	0
Marco	chr1:122371114-122401661	0.126512	0.0911117	0.0828288	0.0301276	0.165538	0.181236	0.275938	0.198338	2.76716
En1	chr1:122499063-122504568	0	0	0	0	0	0	0	0	0
Celrr	chr1:122983981-123017552	0	0	0	0	0	0	0	0	0
Insig2	chr1:123200929-123229166	4.94031	5.58368	5.70815	7.06609	7.83727	7.44075	3.89526	3.95754	5.04406
Ccdc93	chr1:123327643-123403037	8.37167	8.40716	6.47799	8.52217	9.28143	7.65151	9.47047	9.28849	8.66639
Htr5b	chr1:123406349-123425042	0	0	0.0273182	0	0	0	0	0	0
Ddx18	chr1:123450411-123464557	67.3751	68.8491	72.1601	53.3949	47.1189	48.5355	107.929	94.5099	78.9493
Dpp10	chr1:125228714-125942136	0	0	0	0	0	0	0	0	0
Actr3	chr1:127289481-127332304	307.519	331.861	343.494	297.143	338.747	300.618	302.417	310.561	294.507
Slc35f5	chr1:127457592-127492261	6.09668	6.62282	5.89745	9.55203	8.89112	9.5544	3.46845	4.15428	4.32489
Gpr39	chr1:127573572-127770438	0	0	0	0	0	0	0	0	0
Lypd1	chr1:127768618-127808791	0	0	0	0.0291615	0	0.0292374	0	0.0274255	0
Nckap5	chr1:127810212-128727209	0.0327935	0.0978813	0.0214694	0.114833	0.0533367	0.253077	0.194769	0.511218	0.837826
Mgat5	chr1:129101562-129379549	49.1622	45.5849	26.2481	34.2112	48.9001	35.8213	19.8462	21.5251	21.5317
Tmem163	chr1:129386918-129574598	0.170474	0.163697	0.0425186	0.185585	0.148708	0.0697754	0.0472159	0	0.042614
Acmsd	chr1:129625989-129664141	0.0951293	0.0135341	0.0990231	0.00639081	0.0355665	0.0565203	0.0264484	0.117549	0.0269944
2900009J06Rik	chr1:129650193-129670631	0.216643	1.66424	0.189118	0.206365	0.188981	0	0.420021	0.19408	0
Ccnt2	chr1:129670740-129701414	9.76835	9.80487	10.9562	9.4022	8.80316	8.45149	10.3272	11.9373	11.3158
Map3k19	chr1:129711847-129736867	0	0	0	0	0.078999	0	0	0	0.132056
Rab3gap1	chr1:129765349-129840453	16.8558	17.4153	16.0386	19.0393	20.7501	21.2423	14.7746	15.2499	17.0975
Zranb3	chr1:129850755-129999624	3.75477	3.23972	3.4464	4.90111	4.01184	4.25129	2.91055	3.61092	3.79622
R3hdm1	chr1:129999882-130134312	27.2603	27.1038	26.1978	25.3965	25.1872	22.0535	34.2587	34.2443	35.3261
Mir128-1	chr1:130098937-130099007	0	0	0	0	0	0	0	0	0
Ubxn4	chr1:130140757-130175954	43.2687	46.5852	42.3676	53.9269	55.9647	59.3724	42.6232	39.322	40.5829
Lct	chr1:130181340-130224895	0.0472407	0.0635075	0.0164955	0.0269997	0.0494506	0.0180466	0.0457945	0.14389	0.0826623
Mcm6	chr1:130228167-130256233	178.868	188.513	179.626	138.033	129.083	128.398	167.723	148.713	158.265
Dars	chr1:130260283-130313993	81.0501	91.297	101.473	69.003	72.9305	68.6254	87.1852	95.7003	87.1544
Cxcr4	chr1:130484775-130488876	103.912	102.032	66.7343	115.213	151.684	141.208	46.1939	52.218	73.1592
Thsd7b	chr1:131169880-132115855	0	0	0	0	0	0	0.00902718	0	0
Cd55b	chr1:132285104-132319576	0	0.120736	1.44883	0	0.0438723	0.0240163	0.682561	0.405503	0.154009
Cd55	chr1:132335606-132359317	0.0242591	0.314477	6.64955	0.0924329	0.148131	0.127426	2.61033	1.34742	0.456325
Zp3r	chr1:132473282-132526183	0	0	0	0	0	0	0	0	0
C4bp	chr1:132532497-132558195	0	0	0	0	0	0	0	0	0
C4bp-ps1	chr1:132566778-132578148	0	0	0	0	0	0	0	0	0
Pfkfb2	chr1:132585619-132625830	2.97492	2.88608	2.86866	4.98837	4.57249	5.12972	0.0250711	0.0463386	0.0678818
Yod1	chr1:132613903-132618634	2.65867	2.62762	1.77799	2.50293	2.88884	1.97488	0	0	0
AA986860	chr1:132628552-132641199	0.124946	0.0399927	0.072714	0.119018	0.0363307	0.019888	0	0	0
Fcamr	chr1:132697478-132711317	0	0	0	0	0	0	0	0	0
Pigr	chr1:132723260-132748826	0.00515132	0	0	0.00736041	0	0.0147591	0	0	0
Fcmr	chr1:132762353-132777367	0	0	0	0	0	0	0	0	0
Il24	chr1:132778650-132783988	0	0	0	0	0	0	0	0	0
Il20	chr1:132803768-132807873	0	0	0	0	0	0	0	0	0
Il19	chr1:132829232-132835818	0	0	0	0	0.0599961	0	0.133345	0	0
Il10	chr1:132916421-132921547	0	0	0	0	0	0	0	0	0
Mapkapk2	chr1:132950280-132994120	158.619	159.02	132.515	190.514	160.866	161.504	148.009	145.559	142.406
Dyrk3	chr1:133025017-133034811	8.29262	7.49963	11.0296	7.35345	7.2338	6.42221	21.427	16.4247	13.2705
Eif2d	chr1:133049783-133070048	22.8243	24.7363	31.2086	20.5605	25.2618	24.1964	28.4119	31.0124	34.5148
Rassf5	chr1:133072986-133141755	25.534	24.9751	27.8662	26.8203	30.8548	26.7724	24.8718	27.2415	30.1149
Ikbke	chr1:133151178-133176140	28.2681	34.0341	21.053	45.6597	62.7529	55.3396	31.3539	40.3165	48.0343
Srgap2	chr1:133181827-133423938	9.88431	9.58798	7.36716	11.3464	11.7639	10.6139	13.073	13.5689	13.5221
Fam72a	chr1:133424565-133436449	3.22984	2.95916	3.15575	2.06048	1.60258	1.92435	3.33203	3.66327	2.7221
Avpr1b	chr1:133495690-133508577	0	0	0	0.0136048	0.0124588	0	0	0	0
Ctse	chr1:133534890-133572084	0.235196	0.225846	1.10356	1.45625	1.20535	1.6285	0.227996	0.210701	0.0771656
Rab7b	chr1:133585271-133610041	5.05242	3.14884	1.71755	7.26537	8.05182	7.42346	1.38927	1.65381	0.871327
Slc26a9	chr1:133640598-133666982	0.114758	0.188906	0.114489	0.12493	0.0715037	0.0469706	0.365519	0.146866	0.229491
Pm20d1	chr1:133693971-133714692	0	0.0324282	0.0294801	0	0	0.0161262	0	0	0
Slc41a1	chr1:133724588-133745440	2.75581	2.71908	1.98634	2.63711	2.53627	2.6319	2.26705	1.90256	1.22766
Rab29	chr1:133763853-133769464	10.2365	9.99424	6.63952	17.813	16.2127	17.6409	9.86767	8.7605	8.75582
Nucks1	chr1:133807034-133832898	74.3965	74.1333	69.0658	63.1128	58.522	51.2412	64.6313	71.8022	68.0551
Slc45a3	chr1:133859491-133879549	0	0.0353117	0.0321015	0.0175112	0.0160361	0	0	0	0
Elk4	chr1:133904181-133922261	9.13103	8.34677	11.233	11.7622	11.7068	9.15495	12.4268	11.7752	10.9739
Mfsd4	chr1:133923197-133964639	3.37514	2.67277	3.18567	3.27126	3.33065	3.06537	4.1165	4.11443	3.54121
Cdk18	chr1:134010123-134036262	10.4057	9.40202	13.8591	23.147	20.9724	21.0872	39.7723	31.1088	25.3005
Lemd1	chr1:134088012-134153959	0	0	0	0	0	0	0	0	0
Mir135b	chr1:134094664-134094761	0	0	0	0	0	0	0	0	0
Klhdc8a	chr1:134195202-134203934	0	0	0	0	0	0	0	0	0
Nuak2	chr1:134212701-134230065	11.2698	11.8089	5.38463	10.3624	9.98313	9.79978	11.0564	10.1308	8.63813
Tmcc2	chr1:134252891-134287858	0.0527102	0.0168715	0.0460133	0.0167365	0.0613067	0.0335602	0	0	0.0153722
Dstyk	chr1:134314029-134363536	2.16898	2.31903	2.65714	2.93419	3.3707	3.30737	1.23682	1.50222	1.11627
Rbbp5	chr1:134373943-134402242	20.1131	21.4909	21.7606	19.1745	19.3081	18.3456	21.4726	21.934	24.1528
Tmem81	chr1:134402806-134405216	2.30738	3.02453	2.90943	2.72123	2.4281	2.97316	2.48528	2.00145	2.4994
Cntn2	chr1:134406001-134439517	0.0167019	0.0138158	0.0262238	0.0223418	0.0168513	0.0128761	0.0166783	0.00591426	0.00264084
Nfasc	chr1:134461266-134638374	0	0	0	0	0	0	0	0	0
Gm10538	chr1:134625929-134629403	0	0	0	0	0	0	0	0	0
Lrrn2	chr1:134776931-134836582	0.017928	0	0	0	0	0	0	0	0
Mdm4	chr1:134882681-134927164	19.0257	18.9665	21.0841	18.1957	20.1711	18.063	22.0624	21.9956	17.5616
Pik3c2b	chr1:134942588-135005265	0.896902	1.12732	1.74413	1.25027	1.78103	1.01791	5.5489	5.38273	4.54236
Ppp1r15b	chr1:135027742-135036377	55.6009	55.1954	48.2231	64.5404	64.9112	60.7115	54.7372	55.818	58.1776
Plekha6	chr1:135142673-135200012	0.687647	0.516082	0.478794	0.163755	0.0856909	0.062544	1.19816	0.205342	0.48703
Gm19461	chr1:135146428-135166385	0	0	0	0	0	0	0	0	0
Golt1a	chr1:135206399-135219603	0	0	0	0	0	0	0	0	0
Kiss1	chr1:135223788-135226299	0	0	0	0	0	0	0	0	0
Ren2	chr1:135247142-135256900	0	0	0	0	0	0	0	0	0
Ren1	chr1:135247250-135256896	0	0	0	0	0	0	0	0	0
Etnk2	chr1:135260148-135276895	0	0	0	0	0	0	0	0	0
Sox13	chr1:135278876-135320789	0.0507932	0.0162579	0.0591198	0.0322557	0	0.0161698	0.0492383	0	0
Snrpe	chr1:135500447-135506857	108.156	112.871	123.269	111.223	87.6929	103.667	118.117	115.289	96.3379
Zc3h11a	chr1:135516447-135557976	33.4708	31.2648	33.294	34.6251	34.126	34.6914	33.156	31.8719	32.8963
Zbed6	chr1:135552455-135557462	7.21274	5.76602	7.48395	7.98773	7.73431	6.08199	6.00284	5.62101	6.96717
Lax1	chr1:135575605-135586685	0.0816707	0.0261375	0	0.0777962	1.42495	1.16265	1.67366	1.56048	4.12219
Atp2b4	chr1:135599250-135650324	4.25115	4.36311	5.54807	2.82658	3.14226	2.94278	2.36483	2.30685	3.28888
Mir6903	chr1:135623134-135623222	0	0	0	0	0	0	0	0	0
Optc	chr1:135793770-135804576	0	0	0	0.0378621	0	0	0	0	0
Prelp	chr1:135806881-135817978	0	0	0	0	0	0	0.0160746	0	0.0145079
Fmod	chr1:135934091-135944854	0	0	0	0	0	0	0	0	0
Btg2	chr1:135971441-135975732	14.2243	14.2787	9.25727	6.57903	8.12413	8.07234	4.93135	3.64581	4.51919
Chit1	chr1:136007818-136048117	0	0	0	0	0	0	0.0396816	0.0733451	0.465471
Chil1	chr1:136078980-136086608	0.758645	1.63909	2.98016	1.95117	13.5665	6.3759	3.12554	4.55354	9.0601
Mybph	chr1:136090024-136097809	0	0	0.0302601	0	0	0	0	0	0
Adora1	chr1:136095791-136132034	0	0.0247616	0.011246	0	0	0	0	0	0.0225611
Myog	chr1:136186580-136189125	0.132436	0.0847803	0	0	0	0	0	0	0
Ppfia4	chr1:136193359-136229505	0.53803	0.267545	0.201288	0.0457594	0.0251428	0.0734055	0	0	0.00840581
Tmem183a	chr1:136242673-136258576	25.7458	25.4156	25.8766	25.0858	24.4798	24.2796	30.7413	27.3345	28.1108
4933406M09Rik	chr1:136282516-136287560	0	0	0	0	0	0	0	0	0
Cyb5r1	chr1:136302566-136308315	32.4429	31.9138	36.2051	27.47	25.7089	29.3574	34.8289	32.0094	36.321
Adipor1	chr1:136311954-136329927	50.4871	52.5225	57.8158	60.4991	71.5154	66.4872	43.7478	39.4911	44.5769
Klhl12	chr1:136352131-136387450	4.53725	5.29693	6.96834	4.2682	5.79729	5.48398	5.76713	6.20667	6.98398
Rabif	chr1:136391236-136404461	11.1054	12.3898	13.4209	15.8679	16.2671	15.9398	10.8277	14.6357	14.9955
Mgat4e	chr1:136437517-136446259	0	0	0.032113	0	0	0	0.0356607	0.0329555	0.032185
Kdm5b	chr1:136456754-136529455	9.8688	14.2235	22.3521	7.32333	9.45509	7.5277	10.3012	10.5711	14.2449
Syt2	chr1:136543257-136645994	0	0	0	0	0.0617691	0	0.0343214	0	0.0154881
Ppp1r12b	chr1:136662519-136852517	2.69043	2.59367	2.44792	3.52427	3.70161	3.36956	3.69167	4.08183	3.36767
Ube2t	chr1:136859141-136870756	8.36753	9.31577	10.3214	8.89468	10.1025	11.9293	9.16938	8.31086	10.5568
Lgr6	chr1:136882929-137001853	0.0164755	0	0	0	0.0143718	0	0.0159711	0	0.0432435
Ptprv	chr1:137005074-137029152	1.31334	1.27033	1.37242	0.821847	1.246	1.30006	1.55192	1.33973	1.5097
Ptpn7	chr1:137029301-137041897	80.1796	83.5514	78.6478	80.9815	92.3113	82.9096	85.679	83.2193	54.0159
Arl8a	chr1:137043410-137052845	52.9451	50.5513	40.0143	67.4475	63.0779	63.9958	32.1142	35.27	36.8142
Gpr37l1	chr1:137056826-137064258	0	0	0	0	0	0	0	0	0
Elf3	chr1:137150150-137155049	0.129782	0.0623068	0.0566425	0.0308996	0	0.03098	0	0.116265	0.0283807
Rnpep	chr1:137159275-137180661	124.845	121.645	117.418	91.8485	70.3739	73.1997	101.904	83.5616	67.1557
Timm17a	chr1:137198111-137210314	76.3166	80.7169	79.9306	74.0506	62.0238	66.9246	82.4046	79.5506	83.3586
Lmod1	chr1:137221389-137264642	0.0150695	0	0.0131549	0	0	0	0	0	0
Shisa4	chr1:137268032-137271640	2.62793	1.09715	0.897671	0.8707	0.199338	0.381922	0	0	0.0499825
Ipo9	chr1:137278891-137327068	25.9703	25.3862	20.6491	24.7828	23.412	23.1438	21.9798	19.4089	21.9618
Nav1	chr1:137331156-137481932	1.12767	1.20411	1.38821	1.26058	0.307036	0.520999	1.69819	0.324022	0.319623
Mir1231	chr1:137351179-137351260	0	0	0	0	0	0	0	0	0
Csrp1	chr1:137625773-137648806	47.4448	52.7774	69.834	58.9338	60.4644	81.1073	33.9277	35.7686	46.5765
Phlda3	chr1:137662661-137665711	5.44115	3.85438	3.46505	3.3987	2.41211	2.51306	5.75016	3.71578	5.73601
Tnni1	chr1:137695997-137707566	0	0	0	0	0	0	0	0	0
Lad1	chr1:137715174-137729918	0	0	0	0.0192458	0	0.0192959	0.0195858	0	0.0353538
Tnnt2	chr1:137732910-137748845	0.18672	0	0.0543289	0	0	0	0	0	0.0499613
Pkp1	chr1:137767971-137815601	0	0	0.0114836	0	0	0	0	0	0
Igfn1	chr1:137850154-137902919	0	0	0	0	0	0	0	0	0
Tmem9	chr1:137904795-137931607	2.063	0.904348	1.40939	4.52836	4.26426	6.24894	2.08678	1.52671	0.235397
Ascl5	chr1:137947380-137947947	0	0	0	0	0	0	0	0	0
Cacna1s	chr1:137949477-138016399	0.0094035	0	0	0	0.00820284	0	0	0	0
Gm15850	chr1:138024295-138027760	0	0	0	0	0	0	0	0	0
Kif21b	chr1:138027977-138074591	16.4093	16.4	23.9494	10.8338	12.892	10.0655	19.778	16.6758	27.0934
5730559C18Rik	chr1:138110098-138130857	0.0200533	0	0.0175055	0	0	0	0	0	0
Gpr25	chr1:138155490-138157450	0	0	0	0	0	0	0	0	0
Camsap2	chr1:138164699-138242681	4.59865	3.18053	2.22663	7.14119	5.48193	5.88174	4.91657	4.04685	4.60555
9230116N13Rik	chr1:138308492-138312096	0.0595135	0.114295	0.155856	0.17007	0.0519146	0.0568376	0.0865375	0.0533152	0.104137
Ddx59	chr1:138311847-138336797	3.20054	2.72588	2.57525	3.44636	2.96183	3.34901	1.94248	2.16911	2.82452
Kif14	chr1:138364424-138427396	8.96125	9.56256	9.43077	8.65486	8.8561	7.69191	8.91517	9.92015	10.3184
Zfp281	chr1:138521477-138526968	5.55835	5.64707	5.20035	5.83485	6.2821	5.56324	5.54787	6.27273	6.62361
Gm19705	chr1:138579972-138587382	0	0	0	0.771938	1.18646	1.02452	0.263536	0.726303	0.704202
Platr22	chr1:138592787-138622305	0	0	0	0	0	0	0	0	0
Nr5a2	chr1:138740160-138857025	0	0	0	0	0	0	0	0	0
Mir181a-1	chr1:139863031-139863118	0	0	0	0	0	0	0	0	0
Mir181b-1	chr1:139863215-139863295	0	0	0	0	0	0	0	0	0
Ptprc	chr1:139959435-140071882	60.7865	58.6991	52.2015	72.841	80.049	71.892	28.151	30.982	31.0175
Atp6v1g3	chr1:140170314-140186039	0	0	0	0	0	0	0	0	0
Nek7	chr1:140381290-140516273	23.8537	20.9096	23.113	23.8208	23.512	21.1001	15.0919	17.2359	18.5526
Gm5833	chr1:140536671-140578652	0.163179	0.0313383	0.0854682	0.373051	0.797127	0	0.0316368	0.0292369	0
Lhx9	chr1:140721762-140744156	0.0300745	0	0.0262533	0	0.0262343	0.0287223	0	0.0116087	0
2310009B15Rik	chr1:140748555-140753431	5.21839	6.48472	7.63696	3.65502	2.6777	5.57008	3.86837	5.77487	3.22278
Dennd1b	chr1:140860285-141072619	5.89971	6.11174	5.92053	7.87014	8.98678	8.23978	6.52407	6.18966	6.18232
4930596I21Rik	chr1:140874233-140875823	0	0	0	0	0.191934	0	0	0	0.192504
Crb1	chr1:141094830-141273653	0	0	0	0	0	0	0	0	0
4933436E23Rik	chr1:141276028-141299429	0	0	0	0	0	0	0	0	0
Zbtb41	chr1:141318959-141349584	2.21646	2.13497	1.67567	2.44675	2.6442	2.69711	2.53683	2.36295	2.68829
Aspm	chr1:141351349-141390665	6.32559	5.82778	5.75602	7.76373	8.36588	6.7316	7.10967	7.57835	9.97704
F13b	chr1:141398283-141420333	0	0	0	0	0	0	0.0251174	0	0
Cfhr1	chr1:141443640-141456799	0	0	0	0	0	0.0352073	0	0.0330254	0.0322533
Gm4788	chr1:141594495-141677816	0	0	0	0	0	0	0	0	0
Cfhr2	chr1:141706868-141755276	0	0	0	0	0	0.0192406	0	0	0
Cfh	chr1:141982431-142079988	0.0541502	0.038998	0	0.0515813	0.011809	0.0193933	0	0	0
Kcnt2	chr1:142142833-142506838	0	0	0	0	0	0	0	0	0
4930590L20Rik	chr1:142466752-142552979	0	0	0	0	0	0	0	0	0
Cdc73	chr1:145454628-145549814	25.4098	26.892	30.8672	24.8767	22.6024	22.0928	38.8019	36.7763	38.6855
B3galt2	chr1:145487826-145497067	0.0901482	0.0865642	0.0337263	0.613368	0.393189	0.258285	0.0124841	0.011537	0.0901385
Glrx2	chr1:145586478-145596808	7.39523	7.78249	8.43598	7.19094	8.17734	7.80707	8.23383	8.40147	8.45969
Trove2	chr1:145597920-145624181	0.9525	0.744726	0.595896	1.17321	0.865503	0.874613	0.9118	1.01922	1.42364
Uchl5	chr1:145624407-145654596	83.559	91.237	98.0629	68.771	67.1098	67.877	96.8527	95.5131	86.3347
Rgs2	chr1:145846467-145851279	19.1179	14.7326	15.7423	12.9313	9.73987	9.58947	3.23154	4.80343	4.12889
Rgs13	chr1:145985796-146024502	0	0	0	0	0	0	0	0	0
Rgs1	chr1:146091798-146096234	11.1558	5.81249	4.10499	21.0148	19.7683	17.7252	0.969891	2.01671	0.700289
Rgs21	chr1:146366819-146414797	0	0	0	0	0	0	0	0	0
Rgs18	chr1:146599970-146622551	21.6128	25.5906	17.7675	23.862	26.1273	24.8018	2.70551	3.87237	0.655122
Brinp3	chr1:148342795-148749602	0	0	0	0	0	0	0	0	0
Pla2g4a	chr1:151676748-151808420	22.8421	21.6687	22.815	25.1993	24.2257	25.7113	24.533	20.0638	20.8213
Mir7652	chr1:151871390-151899332	0	0	0	0	0	0	0	0	0
Ptgs2os	chr1:151922002-151947004	0	0.0387743	0	0	0	0	0	0	0
Ptgs2	chr1:151947253-151955142	2.41556	1.8117	1.3725	0.993908	1.75802	1.50157	0.221691	0.0640231	0.125053
Ptgs2os2	chr1:152006172-152012078	1.16972	0.912614	0.76583	0.800853	0.542071	0.488744	0.248044	0.261974	0.319812
Pdc	chr1:152166546-152181036	0	0	0	0	0	0	0	0	0
2310030A07Rik	chr1:152167810-152193901	0	0	0	0	0	0	0	0	0
BC003331	chr1:152208440-152240185	14.3142	13.7985	12.3822	16.514	14.6862	15.5122	8.55567	10.0826	9.83068
Prg4	chr1:152296541-152313295	1.4078	1.41621	1.81374	1.53298	1.19903	1.37685	1.23508	1.47168	1.02659
Tpr	chr1:152239967-152297065	94.3865	95.1845	96.9871	82.9259	86.3685	79.1138	103.495	100.253	95.3531
Hmcn1	chr1:152409631-152840565	0.00311043	0.0089603	0	0.00296287	0	0	0	0	0
C730036E19Rik	chr1:152985163-152991225	0	0.0222045	0	0	0.0201713	0.0220841	0	0	0
Ivns1abp	chr1:153191627-153211575	141.794	135.328	145.618	125.784	104.137	111.242	97.3754	97.9434	101.956
Swt1	chr1:153214828-153275565	3.98406	4.20042	5.35167	3.79505	4.07114	4.03788	4.71333	4.74912	5.60554
Trmt1l	chr1:153275777-153305313	19.1122	18.5722	18.702	16.832	16.1728	16.526	14.2892	18.229	14.3984
Mir7682	chr1:153289522-153289580	0	0	0	0	0	0	0	0	0
Rnf2	chr1:153316535-153347953	21.2234	22.18	25.2307	17.4044	16.2863	14.6494	14.7535	19.7992	23.0011
Fam129a	chr1:153418502-153566477	1.17636	1.27441	11.4276	2.28421	7.28838	5.86221	0.950293	1.10789	5.39674
Edem3	chr1:153602503-153669458	12.6918	11.5787	15.9889	15.3091	15.77	16.3829	8.83072	9.26471	9.80276
1700025G04Rik	chr1:153731653-153937450	2.83714	2.65673	2.20377	2.91043	1.88364	2.34905	3.23058	3.00665	4.00459
Tsen15	chr1:154217865-154233812	12.5041	11.7155	11.8162	7.97914	8.26007	8.5796	14.8869	13.9751	16.8878
Colgalt2	chr1:154246996-154357825	0	0	0	0	0	0	0	0	0
Rgl1	chr1:154364659-154472241	5.3072	2.68762	2.20297	3.75879	8.89889	9.37759	0.222395	0.630274	2.43539
Apobec4	chr1:154597680-154604674	0	0	0	0	0	0	0	0	0
Arpc5	chr1:154613671-154622710	157.543	159.203	150.655	169.212	180.789	187.002	98.2763	99.1372	109.278
Ncf2	chr1:154655019-154684120	82.6949	79.4806	87.6233	85.6528	93.9607	95.404	59.9877	50.4383	44.9255
Smg7	chr1:154684124-154749776	21.2001	20.2198	20.0611	19.3298	21.57	18.7038	21.3422	24.9431	24.1899
Nmnat2	chr1:154802230-154966391	0	0	0	0	0	0	0	0	0
Lamc2	chr1:154969885-155033577	0.0113568	0.0109053	0.0099139	0.0216361	0	0	0.0220183	0.010174	0.00993614
Lamc1	chr1:155066051-155179916	4.75363	2.97504	2.49908	1.32372	0.735273	0.906529	0.507923	0.863954	0.0597937
E330020D12Rik	chr1:155251315-155261363	2.47502	2.62924	0.906095	1.99962	1.99509	2.56371	2.83643	1.89501	1.48432
Shcbp1l	chr1:155272338-155299704	2.01942	1.79223	1.41562	1.57387	0.667262	0.818202	1.77963	2.27508	3.29268
Dhx9	chr1:155302887-155334790	118.089	116.952	116.347	101.035	95.8675	90.6581	131.045	125.316	113.478
Npl	chr1:155350145-155396844	4.0403	7.35333	2.29663	8.32377	9.91756	10.0504	4.50866	3.78785	6.37101
Rgs8	chr1:155500166-155544795	0.0100589	0	0.00878088	2.65413	3.06231	4.63999	0	0	0
C230024C17Rik	chr1:155568369-155584959	0	0.0172647	0.0156951	0	0	0.0171711	0	0	0
Rgs16	chr1:155587482-155592598	0.0793002	0	0	0.151076	0.0461166	0.10098	0	0	0
Rnasel	chr1:155596555-155611351	16.0013	15.9275	14.3803	12.5162	19.9046	20.4852	5.50671	6.1049	7.85911
Rgsl1	chr1:155626516-155691271	0.016394	0	0.0286222	0.109314	0.0286015	0.0626274	0.0158921	0.0293731	0
Teddm2	chr1:155696671-155698325	0	0	0	0	0	0	0	0	0
Teddm1b	chr1:155721474-155724001	0.34157	0.340343	0.236046	0.143209	0.159022	0.162164	0.354974	0.257264	0.179294
Teddm1a	chr1:155738775-155740190	0	0	0	0	0	0	0	0	0
Mir8114	chr1:155747055-155747166	4.38542e-05	13.8744	0.000227443	0	0	0	0	0.000638841	5.55245e-06
Glul	chr1:155747058-155756853	36.2475	33.4195	39.5196	11.255	6.98456	9.54828	38.5992	30.5918	37.7718
Zfp648	chr1:156048316-156052804	0	0	0	0	0	0	0	0	0
4930452N14Rik	chr1:156088650-156104036	0.137722	0	0	0	0	0	0	0	0
4930532M18Rik	chr1:156102818-156117546	0	0	0	0	0	0	0	0	0
Cacna1e	chr1:156239648-156573050	0	0	0	0.00859001	0.0668644	0.047368	0.00437088	0.0363538	0.0828424
Ier5	chr1:156943496-156946766	10.7846	9.12088	10.922	11.4455	11.0102	11.8437	10.3476	8.92072	11.2519
Mr1	chr1:156975007-156993910	4.27665	4.08316	3.2213	5.81966	5.03097	6.20823	0.639627	0.810034	2.245
Stx6	chr1:157005832-157050647	17.8356	17.8941	13.9123	16.585	18.1296	17.32	9.1049	10.8534	14.5117
Xpr1	chr1:157122786-157264574	20.06	18.6233	20.2384	20.1171	20.6394	17.3394	13.0446	14.298	15.3998
Gm5532	chr1:157367302-157374241	0	0	0	0	0	0	0	0	0
Acbd6	chr1:157405249-157534363	30.7028	33.091	27.3198	28.1873	27.5892	26.8312	50.5062	51.7046	44.2777
Lhx4	chr1:157548823-157589157	0	0	0	0	0	0	0	0	0
Qsox1	chr1:157625284-157660029	35.6084	38.9359	37.1086	39.5992	78.2288	70.6381	21.8801	20.7532	31.6983
Cep350	chr1:157692093-157820385	9.29445	7.71953	7.74579	9.31216	10.0203	8.10056	5.77602	6.5356	7.5563
Tor1aip1	chr1:157851728-157883610	23.647	22.9206	22.4711	30.388	30.8068	29.46	19.1751	18.7357	16.9897
Tor1aip2	chr1:157882793-157915989	32.7957	30.4367	35.9352	42.8747	37.9829	37.9273	36.0527	37.0305	37.8071
Fam163a	chr1:157923085-158135156	0	0	0	0	0	0	0	0	0.0133631
Tdrd5	chr1:158185425-158233737	0	0	11.5657	0	0	0	0	0	0
Nphs2	chr1:158240865-158258166	0	0.0186261	0.575715	0	0	0	0	0.0173771	0
Soat1	chr1:158358238-158404459	57.3324	50.2696	37.59	59.9925	47.729	49.167	53.9816	48.5917	46.2837
Abl2	chr1:158488917-158579750	6.89758	5.82911	6.8284	7.18646	6.13477	5.55077	9.62376	8.59787	8.06095
Tor3a	chr1:158583747-158604470	15.02	13.2577	16.9633	12.171	10.5684	9.92013	9.87315	12.1217	10.8249
Fam20b	chr1:158608701-158649041	24.8694	24.2561	31.4126	27.0814	30.8662	28.1787	25.4753	25.8195	23.591
Ralgps2	chr1:158734296-158869757	3.08771	3.43101	5.71913	4.15638	5.75952	4.62692	4.95869	4.98855	4.35412
Angptl1	chr1:158769153-158791209	0.113453	0.0272357	0.0495194	0.0270177	0	0	0	0	0
Tex35	chr1:159029277-159038811	0	0	0	0	0	0	0	0	0
Rasal2	chr1:159065313-159342726	2.16345	1.51136	1.38396	1.03041	0.255587	0.393557	2.76301	2.35857	2.03803
2810025M15Rik	chr1:159342482-159350367	15.8177	13.9868	14.9504	5.63668	1.09193	1.73888	13.6788	16.8208	12.2958
BC026585	chr1:159388712-159418864	4.82822	3.78878	6.84336	0.989068	0.317013	0.396656	1.96276	2.27896	3.04327
Sec16b	chr1:159436926-159498555	1.04666	0.678732	9.84881	0.401388	0.272716	0.350504	8.56502	10.8622	5.80362
Brinp2	chr1:160175399-160286391	0	0	0	0	0	0	0	0	0
Astn1	chr1:160292434-160621917	0	0	0	0	0.0070117	0	0	0	0
Mir488	chr1:160435755-160435864	0	0	0	0	0	0	0	0	0
Pappa2	chr1:160641861-160887569	0.0201634	0	0.0058672	0	0.0117259	0	0.00651538	0.0361268	0
Rfwd2	chr1:161162456-161277711	19.1558	18.7956	19.3976	19.0875	16.2745	17.1414	16.5999	14.6439	14.8094
Scarna3a	chr1:161270437-161270555	0	0	0	0	0	0	0	0	0
Mir1843b	chr1:161270488-161270554	0	0	0	0	0	0	0	0	0
Tnr	chr1:161453899-161855053	0	0	0	0.0103366	0.00946589	0	0	0	0
4930523C07Rik	chr1:161974510-162008717	3.20398	3.92384	3.20617	4.97684	7.60266	6.49815	4.79904	4.86827	4.75519
4930562F07Rik	chr1:162004865-162008116	3.86986	4.23385	3.01984	5.2296	9.31037	7.82198	6.20455	6.44887	6.40381
Tnn	chr1:162015162-162083706	0	0	0	0	0	0	0	0	0
Mrps14	chr1:162125390-162131317	12.0888	12.5271	13.1981	14.1587	11.3244	13.4644	13.3885	12.9729	11.4417
Cacybp	chr1:162132497-162143023	146.218	147.523	157.142	102.148	80.6097	86.9307	205.776	199.105	155.431
Rabgap1l	chr1:162149304-162723069	11.2086	10.8605	13.7193	10.5599	16.4391	13.3146	16.1559	15.4126	9.25298
Mir1927	chr1:162225994-162226103	0	0	0	0	0	0	0	0	0
Gpr52	chr1:162506798-162507884	0	0.0613261	0	0.121671	0.111421	0.0609936	0.0619101	0	0
Rc3h1	chr1:162836541-162905107	7.90192	6.88704	6.85701	6.72271	5.40162	4.82367	6.65452	6.66335	6.65806
Serpinc1	chr1:162908736-162933145	0.0575672	0.0552785	0.0502532	0.0274181	0	0.0824683	0.139512	0.0257858	0.125915
Zbtb37	chr1:162947886-162964390	1.20958	1.47024	1.40341	1.06469	0.921576	0.716513	0.875704	1.01502	1.00469
Gas5	chr1:162965296-162968668	76.5363	76.4243	78.7392	30.5961	23.6068	25.8111	92.1163	113.055	90.279
Snord47	chr1:162968222-162968287	1020.97	326.794	594.17	324.179	0	0	329.906	304.879	0
Dars2	chr1:162970743-163000763	11.3149	12.077	12.3333	9.16799	7.3917	7.50322	16.0242	17.3639	15.7613
Cenpl	chr1:163000897-163016856	5.94771	6.29315	6.4816	7.6231	7.90009	7.55118	5.43416	5.80187	5.14461
Klhl20	chr1:163018508-163061610	10.8162	12.0373	10.3015	10.2891	11.9094	10.5826	7.72139	9.57125	12.3176
Ankrd45	chr1:163072842-163100638	0	0.0153709	0	0	0	0	0	0	0
4930469G21Rik	chr1:163086973-163089445	0	0	0	0	0	0	0	0	0
Prdx6	chr1:163170242-163181341	128.801	137.767	70.8803	122.836	119.335	122.267	196.784	172.057	150.245
Tnfsf4	chr1:163325568-163348337	0.0400921	0	0	0	0.069946	0	0	0	0.0350768
Tnfsf18	chr1:163424787-163435421	0	0	0	0	0	0	0	0	0
Fasl	chr1:163710822-163718626	0.0334376	0	0	0.0310157	0	0	0	0	0
Suco	chr1:163746242-163806792	7.59492	7.64743	7.91085	8.05214	9.24949	8.20528	5.12596	5.44809	4.368
4930558K02Rik	chr1:163872219-163909767	0	0	0	0	0	0.138634	0	0	0
Pigc	chr1:163899318-163903566	5.86306	5.77026	6.42562	5.86328	6.62807	6.8554	5.47114	5.75966	5.78482
Dnm3	chr1:163917432-164408165	0.00770059	0	0	0	0	0	0	0	0
2810442N19Rik	chr1:163935099-163946616	0	0	0.0687723	0	0.0687226	0	0	0	0
Dnm3os	chr1:164147753-164155681	0	0	0	0	0	0	0	0	0
Mir199a-2	chr1:164147944-164148054	0	0	0	0	0	0	0	0	0
Mir214	chr1:164153498-164153608	0	0	0	0	0	0	0	0	0
Mettl13	chr1:164463802-164478476	12.3071	13.2611	13.3676	11.9308	10.6597	10.3184	19.7643	20.6847	16.9994
Vamp4	chr1:164500958-164529209	10.7917	11.3152	9.48393	11.363	10.8701	12.2707	6.87256	7.21828	7.3459
Myoc	chr1:164569280-164579825	0.0300264	0	0	0	0	0.0286763	0	0.0268992	0
7420461P10Rik	chr1:164577373-164588350	0	0	0	0	0	0	0	0	0
Prrc2c	chr1:164601915-164670687	67.7773	59.7265	56.5105	51.7711	50.6826	39.7489	63.1109	67.1938	63.8903
Fmo4	chr1:164724013-164742680	0	0	0	0	0	0	0	0	0
Fmo1	chr1:164759691-164796679	0.0265455	0.0509803	0.0695185	0.0252862	0.138937	0	0.0257329	0.118904	0.0696745
Fmo2	chr1:164805177-164828843	0	0	0	0	0	0	0	0	0
Fmo6	chr1:164846681-164867356	0	0	0	0	0	0	0	0	0
Fmo3	chr1:164883930-164914622	0	0	0	0	0	0	0	0	0
Mroh9	chr1:164954432-165015801	0	0	0	0	0	0	0	0	0
Prrx1	chr1:165175249-165243781	0.00482192	0.000694533	0	0	0.0104744	0	0	0	0
Gorab	chr1:165315039-165333772	2.66374	2.83944	2.73064	2.81672	2.47285	3.15079	2.08471	2.16739	2.694
Mettl11b	chr1:165633123-165655363	0	0	0	0	0	0	0	0	0
Kifap3	chr1:165709713-165847238	5.91913	5.82843	3.33955	5.32231	3.69187	4.74639	1.76664	3.69702	3.88694
Scyl3	chr1:165859230-165885257	9.22993	10.8784	11.7483	9.06034	8.64763	8.51015	10.6913	12.2761	11.3234
BC055324	chr1:165884138-165924912	11.9279	12.2133	13.1018	10.7077	11.2947	9.06555	12.6726	11.7486	11.4921
Mettl18	chr1:165925075-165927374	6.96811	6.12989	7.29936	6.63754	7.56859	7.17002	9.67462	9.82673	8.45636
Sele	chr1:165978364-165987808	0	0.0599226	0	0.0198144	0	0.0198659	0.0201644	0	0.0363982
Sell	chr1:165992206-166010916	103.834	81.4975	28.7985	27.8298	34.6282	49.3498	2.61245	4.10003	3.91101
Selp	chr1:166045394-166080157	0.104508	0.0836274	0.273689	0.0663666	0.045582	0.0499044	0.118193	0.156039	0.121913
F5	chr1:166081965-166150408	5.94545	8.50001	17.5564	5.76731	9.06076	6.28091	5.61237	5.28435	3.42917
Gm16548	chr1:166078706-166082348	0.325916	0.260799	1.3277	0.155227	0.331686	0.207508	0.421252	0.389296	0.190098
Slc19a2	chr1:166179176-166195516	5.90582	5.75249	6.54077	6.99713	6.55263	5.44209	14.2022	13.7056	9.14676
Ccdc181	chr1:166205728-166217978	5.9925	6.13787	7.00391	5.77163	6.01146	5.30973	3.77588	5.66663	6.40796
Blzf1	chr1:166219930-166237615	8.75209	9.51633	10.8092	7.48944	9.49576	8.33895	7.54359	8.62783	8.66911
Nme7	chr1:166237802-166367431	10.4481	10.7063	12.1141	10.563	8.9849	9.5562	9.16955	10.533	10.1613
Atp1b1	chr1:166367229-166388486	4.39116	7.52637	14.1583	6.769	15.1984	8.72565	3.84479	5.3297	9.17088
Dpt	chr1:166726862-166754397	0	0	0	0	0	0	0	0	0
Gm20743	chr1:166793251-166801569	0	0	0	0	0	0	0	0	0
Xcl1	chr1:166861778-166865641	0	0	0	0	0	0	0	0	0
4930568G15Rik	chr1:166996747-167022061	0	0	0	0	0	0	0	0	0
Tbx19	chr1:167067983-167090904	0.183335	0.110029	0.120031	0.0873186	0.079963	0.0218864	0.0222153	0	0.0200501
Sft2d2	chr1:167104471-167124564	19.835	19.4631	23.8565	24.4493	26.5168	23.5021	12.3226	12.4214	13.5756
Tiprl	chr1:167142416-167167089	9.04824	9.79587	10.5249	9.07563	9.61018	9.06244	10.3106	10.388	10.5834
Gpr161	chr1:167225896-167251982	0.388703	0.15552	0.0565528	0.0617104	0.056512	0.0309355	0.157001	0.0725457	0
Dcaf6	chr1:167259631-167390594	10.9535	9.97729	10.8145	10.2435	11.2346	12.1785	8.13532	8.26675	13.1591
Mpc2	chr1:167391338-167411345	54.8556	51.0936	51.2903	51.6753	43.9961	49.0786	52.7563	45.4936	71.8007
Adcy10	chr1:167415313-167506904	0	0	0.00982476	0.0107208	0	0	0.0109102	0.0201651	0.0590808
Mpzl1	chr1:167522311-167564672	15.0087	13.5272	8.28364	12.5863	9.62449	15.3194	14.5408	13.5037	15.5481
Rcsd1	chr1:167579075-167638225	37.9785	43.9554	48.9498	52.7582	75.876	67.2171	56.3092	47.0742	48.9185
Creg1	chr1:167693910-167705435	128.435	107.223	104.745	151.363	119.428	142.179	134.225	118.027	96.5137
Cd247	chr1:167718811-167801284	0	0.0729958	0	0	0.0520549	0.0363001	0.0208669	0.0192839	0.0332544
Pou2f1	chr1:167795284-167932765	5.1981	5.02369	5.16674	4.27904	4.19698	3.06248	5.98372	5.87437	5.89578
Dusp27	chr1:168028278-168058029	0.103303	0.0141635	0.064413	0	0.0128666	0	0	0	0.0129048
Gpa33	chr1:168060590-168096641	0	0	0	0	0	0	0	0	0.0235917
Mael	chr1:168131515-168168875	0	0	0	0	0	0	0	0	0
Ildr2	chr1:168184269-168246963	0	0	0	0	0	0	0	0	0
Tada1	chr1:168309297-168323751	18.612	18.1787	19.2382	20.9927	20.8707	21.2691	17.6763	20.4713	18.7987
Pogk	chr1:168323741-168339959	5.03715	4.51553	10.0191	3.01566	0.920359	1.53578	1.61478	1.72045	0.807686
Gm4846	chr1:168413743-168427719	0	0	0	0	0	0	0	0	0
Gm4847	chr1:168559101-168577824	0.0066868	0	0	0	0	0.0383169	0	0	0
Fmo9	chr1:168592185-168611976	0	0	0	0	0	0	0	0	0
Gm16701	chr1:168904153-168929861	0	0	0	0	0	0	0	0	0
Fam78b	chr1:168931547-169021433	0.0126199	0	0	0	0	0	0.0122335	0	0
Uck2	chr1:169156216-169215258	209.828	197.038	165.647	169.937	163.616	172.568	181.485	182.843	167.762
Mir6347	chr1:169220255-169220356	0	0	0	0	0	0	0	0	0
Tmco1	chr1:169238800-169264109	11.9236	12.0756	13.0159	12.3629	10.1884	11.0621	7.81209	8.22875	8.32365
Aldh9a1	chr1:169280121-169298661	78.7843	75.6933	74.7412	71.72	63.4355	65.9928	204.401	174.864	119.581
Mgst3	chr1:169302514-169323928	21.4335	15.687	15.5159	30.2515	27.8172	45.0585	15.8364	22.0111	16.2367
Lrrc52	chr1:169375805-169396911	0	0	0	0	0	0	0	0	0
Rxrg	chr1:169528492-169569754	0	0	0	0	0	0	0	0.0261737	0
Lmx1a	chr1:169619688-169778864	0	0	0	0	0	0	0	0	0
Pbx1	chr1:170049494-170362300	0.122808	0.130989	0.242485	0.29683	0.132284	0.361542	0.261468	0.412397	0.109709
Mir6348	chr1:170420773-170420893	0	0	0	0	0	0	0	0	0
Mir6354	chr1:170949104-170949220	0	0	0	0	0	0	0	0	0
Nuf2	chr1:171428064-171461595	41.4048	43.535	41.4092	43.1257	51.5539	48.1507	34.4973	36.3397	36.2962
Rgs5	chr1:171585631-171623657	0.0350962	0.0337009	0.153186	0	0.275535	0	0.136087	0.062882	0
Rgs4	chr1:171671607-171677773	0	0	0	0	0	0	0	0	0
1700084C01Rik	chr1:171859069-171864784	0	0	0	0	0	0	0	0	0
Hsd17b7	chr1:171879667-171899336	12.7741	13.9001	11.7925	9.84743	8.63559	6.13064	11.9457	15.9126	17.3901
3110045C21Rik	chr1:171899539-171902527	0.847054	1.10387	0.897884	0.518702	0.633343	0.288917	0.410562	0.650429	0.582288
Ddr2	chr1:171902437-172019075	0.041798	0.0735832	0.024325	0.0199076	0.00607686	0.0266125	0.148568	0.180983	0.0426643
Uap1	chr1:172071353-172105095	27.2271	25.6936	19.7884	32.3533	31.4817	35.1612	16.9329	19.7202	19.6672
Uhmk1	chr1:172129386-172145524	19.2511	19.0504	13.6981	19.8119	21.6798	15.9321	15.5115	18.7156	18.0073
Sh2d1b2	chr1:172163001-172181718	3.03172	0.693139	0.882177	10.3139	6.80045	4.68779	1.25953	1.03465	0.63154
Sh2d1b1	chr1:172207454-172215793	14.048	7.4159	4.38112	39.4896	33.0246	29.1088	5.04285	2.91525	3.98995
Gm7694	chr1:172228323-172236463	2.49906	3.51758	5.52839	4.95322	15.1244	13.7865	0.993097	1.18197	3.47658
1700015E13Rik	chr1:172238991-172242256	0	0	0	0.316245	0.19307	0.105689	0	0.0991393	0
Nos1ap	chr1:172247626-172519980	2.38672	2.60281	2.99459	3.48737	10.7018	8.00951	0.780384	1.17656	2.14979
Olfml2b	chr1:172574662-172612920	7.30668	10.1969	29.9697	20.3605	48.3215	31.9879	8.27295	3.52595	1.22739
Atf6	chr1:172634587-172797902	18.2593	16.1697	15.7023	16.2399	16.8214	16.208	12.9687	12.7218	13.7075
Dusp12	chr1:172804318-172815671	5.77736	6.10244	6.72445	4.67779	3.94776	4.96584	8.12073	6.85774	4.84404
Fcrlb	chr1:172837403-172843072	0.208627	0.350582	0.18212	0.0496823	0.136492	0.0996232	0.05056	0.0467246	0.0912645
Fcrla	chr1:172847724-172857714	0	0	0.0337813	0.0368621	0	0.036958	0.0375133	0.0693431	0.0338571
Fcgr2b	chr1:172890688-172906202	95.4349	98.8659	119.537	108.899	122.407	121.271	113.177	91.0527	83.3354
Fcgr4	chr1:172949056-172959892	5.49291	6.1019	4.74801	7.23291	11.1333	9.0518	5.27255	5.4515	5.55963
Fcgr3	chr1:172981299-172989534	153.202	138.426	117.988	218.807	238.094	252.01	78.6282	69.2598	43.3852
Mir6546	chr1:172994721-172994783	0	0	0	0	0	0	0	0	0
Cfap126	chr1:173051791-173057098	0.339331	0.391009	0.296219	0.323233	0.414407	0.324074	0.52631	0.972769	0.17813
Sdhc	chr1:173059287-173080734	75.8566	76.2803	73.8847	73.4686	66.6246	74.1012	51.8605	60.6068	75.1625
Mpz	chr1:173080843-173091254	0	0.0604695	0.0824584	0.0899785	0.137331	0.150354	0.0305227	0.0564146	0
Pcp4l1	chr1:173103394-173126399	0.45195	0.710152	0.179331	0.27396	0.430084	0.156956	0	0	0
Nr1i3	chr1:173144100-173148976	0	0	0	0	0	0	0.0903881	0	0.044639
Apoa2	chr1:173151694-173156510	1.08111	1.06593	1.07162	0.73058	2.14964	1.89151	1.07625	1.13236	1.6404
Tomm40l	chr1:173147933-173152645	10.2663	10.9535	9.86715	12.229	11.036	13.7463	9.04726	10.7949	10.9962
Fcer1g	chr1:173159702-173164480	534.623	466.189	198.853	761.821	791.157	884.073	412.055	373.35	407.173
Ndufs2	chr1:173164990-173177243	98.0742	97.3387	92.8036	109.266	86.7434	95.1226	100.992	101.105	102.714
Adamts4	chr1:173180552-173190053	0.016238	0.0155924	0	0	0	0	0.0157409	0	0
B4galt3	chr1:173200458-173207026	8.19509	8.7738	15.7057	9.6906	12.298	12.6545	11.8707	13.1642	15.4937
Ppox	chr1:173207122-173211317	8.22124	8.39615	8.87966	8.72717	12.611	11.2118	6.75387	8.23882	9.78345
Usp21	chr1:173212083-173218092	10.3997	9.95891	10.1231	8.60361	8.25167	10.8573	14.9149	15.315	13.4612
Ufc1	chr1:173218694-173225113	46.3973	45.0508	42.5728	58.4575	58.0589	70.5014	32.1161	37.382	34.9517
Dedd	chr1:173259275-173272632	14.4418	14.7577	14.7742	14.7256	17.1853	15.7116	12.8849	14.5358	18.0852
Nit1	chr1:173272367-173275776	20.9263	21.8557	26.3869	21.1675	27.208	26.1342	21.6049	25.5859	25.9829
Pfdn2	chr1:173275829-173288301	143.111	154.243	166.336	118.351	106.03	107.462	213.059	222.49	184.984
Klhdc9	chr1:173288579-173290929	7.21316	6.88635	8.22576	6.59295	5.46776	5.77388	11.7617	10.6827	7.33225
Pvrl4	chr1:173300303-173318418	0.136557	0.301891	0.381178	0.166372	0.411376	0.217683	0.0846521	0.0611673	0.015275
Arhgap30	chr1:173319090-173340370	47.9256	46.1718	45.1603	58.6686	58.522	54.4753	39.3317	39.6941	43.1272
Usf1	chr1:173341443-173348890	29.5919	26.8473	27.1805	27.9937	28.5544	33.1122	17.6424	16.3966	22.2188
Tstd1	chr1:173349163-173350483	0.162328	0.467623	0	0.618508	0.141601	0.465088	0.157359	0.581687	0.284044
F11r	chr1:173367691-173394724	0.849044	1.13766	10.3873	2.54207	6.01179	4.29248	2.20476	2.45957	4.21043
Alyref2	chr1:173433608-173434881	4.26816	3.54189	3.72588	3.71432	3.99898	3.8498	2.88604	3.04475	1.77492
Itln1	chr1:173448254-173465425	0	0	0	0	0	0	0	0	0
Cd244	chr1:173489323-173515447	2.96389	2.32859	1.53579	1.44938	1.09225	1.27151	0.122916	0.0425968	0.124803
Ly9	chr1:173518743-173537541	23.8416	18.3507	21.2492	22.9842	13.4534	17.1019	16.7141	19.0108	11.0753
Slamf7	chr1:173562533-173583168	1.3586	0.44442	0.130328	3.89667	6.06891	4.89063	0.115781	0.575115	0.195931
Mir7683	chr1:173571970-173572031	0	0	0	0	0	0	0	0	0
Cd48	chr1:173612185-173635388	41.6763	33.8493	39.7363	44.5043	32.6881	43.0716	1.80463	0.860767	2.52193
Slamf1	chr1:173697262-173731315	0	0.0217754	0	0	0	0.0216574	0	0.0203152	0
Cd84	chr1:173769827-173820849	14.7629	12.3794	10.1699	32.7675	31.4927	34.6297	7.13032	7.48095	8.35114
Slamf6	chr1:173847667-173873999	0.0754751	0.0241581	0	0.0718945	0.0219461	0	0	0	0
Vangl2	chr1:173934501-173957399	0.328772	0.210467	0.932752	0.0260979	0.0477989	0.104663	0.0265589	0.0981768	0.0239704
Nhlh1	chr1:173982422-173987727	0	0.0236925	0.0430773	0	0.0645693	0	0	0	0.021587
Ncstn	chr1:173996143-174012880	84.76	77.8808	79.834	87.4183	81.4815	88.7213	47.9521	44.6571	44.2823
Copa	chr1:174012659-174052463	113.36	113.009	102.602	133.956	135.664	140.833	72.4122	76.9091	74.0418
Pex19	chr1:174056885-174066628	22.481	24.2285	20.8683	19.434	18.1105	17.6621	17.2246	19.4559	23.7166
Dcaf8	chr1:174078145-174126524	41.1769	40.197	40.3776	35.1752	35.0168	36.118	39.006	37.3161	38.4908
Pea15a	chr1:174126859-174136912	11.3502	8.28128	7.67987	12.9599	11.8898	13.2066	0.912889	1.82048	2.68856
Casq1	chr1:174140024-174150026	0	0.0323892	0	0.03213	0	0	0	0.0302172	0
Atp1a4	chr1:174153638-174188555	0.0515053	0.0329718	0.0299743	0.0327079	0.0299527	0.0245948	0.0166429	0.00769018	0.0300416
Atp1a2	chr1:174201839-174228195	0.613105	0.350244	0.784346	0	0.0122374	0.00893194	0	0.00115702	0.0332756
Igsf8	chr1:174242537-174249966	44.747	35.5266	38.9648	38.1263	27.8638	32.92	32.2569	24.261	29.4046
Kcnj9	chr1:174251163-174259394	0.0183724	0	0	0.0350015	0	0.0175463	0.0178099	0	0.0160741
Kcnj10	chr1:174271340-174304216	0.16585	0.179281	0.105535	0.173488	0.156243	0.191344	0.0519002	0.0677302	0.0513184
Pigm	chr1:174306661-174314230	6.3175	5.98555	6.16248	5.35482	5.77774	5.73397	6.65052	6.46119	6.12277
Slamf9	chr1:174405490-174408540	1.91555	1.83939	1.51541	0.627232	0.313306	0.457355	8.70426	2.8422	0.942709
Igsf9	chr1:174412343-174429008	0.0152164	0.112364	0.351287	0.00681587	0.0124923	0.0273624	2.02933	0.569087	0.0385681
Tagln2	chr1:174430376-174437506	408.9	447.324	543.665	451.947	584.945	556.302	483.384	451.389	479.576
Cfap45	chr1:174451260-174476001	0.104443	0.300871	0.30391	0.0663253	0.121476	0.265991	0.067497	0.0311884	0.0609184
4933439K11Rik	chr1:174471750-174480937	0.15286	0.0733914	0.200158	0.0728041	0.333356	0.145987	0.222271	0.0684699	0.0668691
Vsig8	chr1:174486068-174493848	0	0	0	0	0.0307684	0	0	0.0383438	0
Slamf8	chr1:174511507-174520699	0.0460208	0.0147304	0.0401738	0.141254	0.173961	0.380914	0.0396551	0.0274852	0.00894754
Fcrl6	chr1:174526770-174532682	0.0444195	0.0460415	0.0115024	0.0188271	0.0287352	0.0479766	0.0214659	0.00663984	0.0100872
Dusp23	chr1:174560899-174563105	3.57573	2.67551	4.49971	3.40609	4.05087	6.82991	0.855312	1.12324	0.36566
Crp	chr1:174628186-174630097	0.0177746	0.0507298	0.0257822	0.00179575	0.0471418	0.012603	0.0219297	0.0213921	0.0225413
Apcs	chr1:174824091-174825185	0	0	0	0	0	0	0	0	0
Olfr16	chr1:174886898-174887948	0	0	0	0	0	0	0	0	0
Olfr1408	chr1:175060413-175061346	0	0	0	0	0	0	0	0	0
Olfr1406	chr1:175113572-175114635	0	0	0	0	0	0	0	0	0
Olfr218	chr1:175133488-175134430	0	0	0	0	0	0	0	0	0
Olfr1404	chr1:175145737-175146771	0	0	0	0	0	0	0	0	0
Fcer1a	chr1:175151401-175157360	0	0	0	0	0	0	0	0	0
Olfr418	chr1:175200277-175201268	0	0	0	0	0	0	0	0	0
Mptx2	chr1:175204591-175207887	0	0	0	0	0	0	0	0	0
Ackr1	chr1:175262016-175263634	0	0	0	0	0	0	0	0	0
Cadm3	chr1:175264384-175297826	0	0	0	0	0	0	0	0	0
Aim2	chr1:175350734-175396167	24.4103	21.6295	23.7398	20.9542	15.6823	16.2547	16.5887	16.0892	18.5577
BC094916	chr1:175451441-175466088	2.19891	1.04458	0.563905	4.45746	3.73228	5.74981	0	0	0
Pydc4	chr1:175522087-175529405	0.0232273	0	0.0101331	0.0110572	0.0405329	0.0332798	0	0	0
Pyhin1	chr1:175560989-175578059	6.6807	2.77596	1.3066	11.8582	10.2602	14.748	0.0165822	0	0.00498868
Pydc3	chr1:175603810-175628523	0.141684	0.0388718	0.0088345	0.125323	0.194219	0.0869875	0.039242	0.0181326	0
AI607873	chr1:175653558-175671940	3.43865	1.52587	0.612349	4.38554	4.91024	3.90748	0.380244	0.759228	0.666328
Ifi204	chr1:175677424-175697050	1.15838	0.616521	0.250841	0.953736	1.15343	0.75897	0.0696383	0.140778	0.145343
Mndal	chr1:175787350-175810318	6.25883	2.55002	1.35148	5.8412	4.92862	6.40362	0.0106817	0.0444215	0.530236
Mnda	chr1:175826471-175843177	0.63378	0.490905	0.124459	1.03252	0.855122	0.526088	0.0517755	0.074288	0.0519213
Ifi203	chr1:175850530-175872803	2.80456	1.41633	0.373154	3.7014	2.42422	3.81063	0.0439267	0.0358398	0.530025
Ifi202b	chr1:175892699-175912975	0	0	0	0	0	0	0	0	0
Ifi205	chr1:175942128-175961886	0.386457	0.249528	0.0581649	0.641042	0.514388	0.381807	0.0258363	0	0.0174886
Olfr433	chr1:175972063-175973067	0.0704112	0	0	0.0670709	0	0	0	0	0
Olfr432	chr1:175980505-175981444	0	0	0	0	0	0	0	0	0
Olfr430	chr1:175999430-176000384	0	0	0	0	0	0	0	0	0
Olfr429	chr1:176019168-176020111	0	0	0	0	0	0	0	0	0
Olfr427	chr1:176029590-176030538	0	0	0	0	0	0	0	0	0
Olfr426	chr1:176029590-176030541	0	0	0	0	0	0	0	0	0
Olfr231	chr1:176047221-176048145	0	0	0	0	0	0	0	0	0
Olfr424	chr1:176066876-176067824	0	0	0	0	0	0	0	0	0
Olfr421-ps1	chr1:176081611-176082661	0	0	0	0	0	0	0	0	0
Olfr420	chr1:176088852-176089898	0	0	0	0	0	0	0	0	0
Spta1	chr1:176102906-176178580	0	0	0.00599597	0	0	0	0	0.00615329	0
Olfr419	chr1:176180019-176181107	0	0	0	0	0	0	0	0	0
Mptx1	chr1:176260648-176263008	0	0	0	0	0	0	0	0	0
Olfr417	chr1:176299049-176299979	0	0	0	0	0	0	0	0	0
Olfr248	chr1:176321176-176322186	0	0	0	0	0	0	0	0	0
Olfr414	chr1:176360560-176361515	0	0	0	0	0	0	0	0	0
Olfr220	chr1:176378755-176379733	0	0	0	0	0	0	0	0	0
Fmn2	chr1:176431955-176752860	0	0	0	0.00860171	0	0	0	0	0
Grem2	chr1:176763915-176851950	0	0	0	0.0606127	0.0832601	0.106348	0	0	0
Rgs7	chr1:176989206-177422676	0	0	0	0	0	0	0	0	0
Fh1	chr1:177531508-177555766	83.2318	86.6651	76.8236	78.5317	64.415	75.6092	72.3861	79.2986	85.0027
Kmo	chr1:177562323-177590984	0.515659	0.353684	0.128612	1.96478	1.56365	2.39201	0.428463	0.241976	0.150384
Opn3	chr1:177592552-177622763	5.25837	5.741	3.61564	6.68999	6.2521	6.5698	2.51379	3.25878	2.74145
Chml	chr1:177612368-177618484	6.24087	6.5417	5.1402	8.3681	10.6636	8.33527	5.71731	6.17985	4.89332
Wdr64	chr1:177628723-177745864	0	0	0	0	0	0	0	0	0
Exo1	chr1:177810908-177841527	9.07311	9.95702	9.76596	7.51933	7.08053	6.56482	13.8419	13.8102	12.4463
Becn2	chr1:177850459-177852356	0.0355391	0	0.0310238	0	0	0	0	0	0.0310934
Pld5	chr1:177892436-178205443	0.00612839	0	0	0	0	0	0	0	0
Cep170	chr1:178663783-178737255	14.5305	13.5266	11.0175	11.8468	9.76028	8.88619	9.06843	7.60022	10.3461
Mir350	chr1:178702455-178702554	0	0	0	0	0	0	0	0	0
Sdccag8	chr1:178744790-178950563	8.00947	8.42853	9.67365	6.877	7.35049	7.56552	3.53115	3.40089	4.91488
Hmga2-ps1	chr1:178764754-178766264	6.38342	6.12963	2.97445	4.72478	5.34262	5.86985	6.83607	6.18226	1.73585
Akt3	chr1:178952245-179178898	4.3388	2.41144	6.64176	0.41448	0.520546	0.510543	0.144618	0.0668237	1.17471
Zbtb18	chr1:179374791-179380897	21.6593	18.3771	11.3437	19.4206	18.447	18.6264	8.18727	8.21828	8.1906
2310043L19Rik	chr1:179571672-179573074	0	0	0	0	0	0	0	0	0
1700016C15Rik	chr1:179659944-179683436	0	0	0.0902237	0	0	0.0987081	0	0	0
Adss	chr1:179693308-179726640	67.2886	66.9621	62.3609	55.2334	54.7434	53.3159	66.1818	66.4675	55.7032
Gm16432	chr1:179921565-179978422	0	0	0	0	0	0	0	0	0.0337786
Desi2	chr1:180117547-180182728	12.4069	12.4803	10.6956	13.7991	11.7052	11.2183	12.3676	13.4056	16.4737
Cox20	chr1:180249283-180252824	47.3238	46.7724	46.5507	38.262	32.421	44.7551	23.497	31.6412	44.4335
Hnrnpu	chr1:180258430-180267915	356.034	350.494	359.036	289.31	277.259	274.697	398.669	404.723	362.301
Efcab2	chr1:180336011-180413380	0.844703	0.834295	0.884857	0.620714	0.610532	0.783673	0.63168	0.756727	0.654574
Kif26b	chr1:180459255-180862988	0.0391071	0.00751046	0	0	0.0341138	0.00746974	0.00758198	0.00700682	0
Smyd3	chr1:180885169-181448134	5.38816	5.62321	5.23806	6.24216	6.49601	7.0896	5.73303	6.4586	6.98288
Tfb2m	chr1:181458186-181476398	17.5716	19.2835	19.2396	17.3836	16.9484	17.0213	25.6722	25.5463	22.9505
Cnst	chr1:181476659-181557604	7.53918	6.80333	5.99228	6.4028	6.80294	6.01049	4.88064	4.99864	7.57243
Sccpdh	chr1:181598361-181617315	14.7873	15.9625	16.3432	4.55992	3.88979	5.13543	2.1931	1.02805	0.516353
Ahctf1	chr1:181675034-181734146	24.5117	23.8381	24.8287	23.6225	22.4641	20.1045	56.9031	51.8026	35.71
Cdc42bpa	chr1:181891219-182095733	4.1121	4.71018	3.07767	0.450743	1.19762	2.48872	2.70701	2.58525	0.192422
Adck3	chr1:182095368-182126151	0.937814	1.16198	0.831867	0.82127	0.686096	0.635619	2.36074	3.67225	1.08517
Psen2	chr1:182157134-182186431	18.567	17.1953	24.7645	34.2352	23.7875	26.9433	40.6873	38.5858	39.0581
Gm5069	chr1:182257099-182260680	69.6017	73.6667	74.5786	51.2004	47.0692	45.4247	48.0053	58.2807	98.0318
Itpkb	chr1:182260606-182353790	8.7077	8.49406	8.80634	9.68617	10.2951	8.79955	10.9278	10.1194	12.0466
6330403A02Rik	chr1:182362503-182413635	0.00886664	0.00851413	0.0154802	0.00844601	0.0154691	0.0338719	0	0.00794319	0.0232725
Parp1	chr1:182499105-182531385	69.0945	69.5573	66.342	59.3149	45.3534	50.1739	93.3249	92.5828	86.4871
Mir6904	chr1:182517331-182517398	0	0	0	0	0	0	0	0	238.62
Lin9	chr1:182571280-182620818	6.87926	8.14803	9.56518	10.4987	11.1945	10.774	11.7118	11.4795	12.2377
Mixl1	chr1:182623178-182627165	0	0.0259425	0	0	0	0	0.0261895	0.0242028	0
Acbd3	chr1:182656173-182684335	26.4665	26.358	23.4049	32.7167	33.044	29.9037	20.4582	21.2386	23.1708
H3f3a	chr1:182732698-182743734	528.957	525.254	603.998	478.749	526.526	527.969	430.236	413.113	373.256
Sde2	chr1:182781281-182798245	20.2606	18.5856	19.0203	15.2922	14.728	13.5483	19.9878	18.3194	18.997
Lefty2	chr1:182823249-182829233	0.0748732	0.047931	0.0326802	0.0713211	0	0.0476711	0.241937	0.055896	0.0545892
Pycr2	chr1:182834404-182838219	42.6811	42.7679	44.555	54.8879	57.2738	65.1345	63.7254	53.8992	53.5577
Lefty1	chr1:182865169-182868532	0.120706	0.115907	0.263425	0.191632	0.0701958	0.0768524	0.273025	0.0540672	0.651239
Tmem63a	chr1:182872648-182905235	22.8103	24.5589	25.2426	26.0066	30.8909	27.5277	20.5287	18.8218	25.5266
Ephx1	chr1:182919686-182947626	2.12055	1.66601	1.04336	1.94649	1.61436	1.47287	2.05563	2.07239	11.1654
9130409I23Rik	chr1:182981367-182990798	0	0	0.0290276	0	0	0	0	0	0
Nvl	chr1:183023553-183074288	26.2024	26.0792	28.8908	19.5767	16.9985	15.2199	38.5258	38.4126	29.9219
Cnih4	chr1:183081061-183099125	13.3011	12.075	14.4277	15.7347	12.2843	13.1376	12.0563	10.6147	13.4588
Wdr26	chr1:183103356-183142109	52.6859	45.2215	42.8242	39.1562	31.4907	29.8757	31.4687	32.3374	36.2626
Cnih3	chr1:183282758-183390772	0	0	0	0	0	0	0	0	0.0212212
Ccdc121	chr1:183439763-183441582	0	0	0	0	0	0	0	0	0
Lbr	chr1:183745445-183772532	92.6714	112.995	130.173	78.5148	106.582	88.4404	103.404	91.1439	98.2278
Enah	chr1:183826515-183950111	8.84444	7.92516	12.2829	12.5394	10.5964	9.44838	10.542	6.67035	2.51931
Srp9	chr1:184054867-184062546	80.7831	85.429	88.0039	106.453	105.454	121.86	73.5137	74.2875	67.5974
Vmn1r1	chr1:184087308-184088229	0	0	0	0	0	0	0	0	0
Degs1	chr1:184205900-184212890	37.5009	26.2491	31.9991	46.2089	46.5453	58.8449	4.24471	10.4232	22.3566
1700047M11Rik	chr1:184230964-184233420	0	0.112218	0.102016	0	0	0.223219	0	0	0.102245
Fbxo28	chr1:184243232-184271737	6.24424	5.26085	6.67265	5.10481	6.48	6.67179	0.637778	1.92893	3.77814
Trp53bp2	chr1:184339297-184392567	2.98821	2.66166	3.96594	2.24109	3.03128	3.49952	0.183503	0.678332	2.4961
Capn2	chr1:184397389-184447614	16.9121	9.30837	4.78367	22.9317	23.8846	31.2387	1.97832	2.89472	9.48962
Capn8	chr1:184495137-184562483	0	0.0237341	0	0	0	0	0.0239602	0	0
Ccdc185	chr1:184677256-184679311	0	0	0	0	0	0	0	0	0
Susd4	chr1:184695036-184825785	0.0307643	0	0	0	0	0	0	0	0
Tlr5	chr1:184884918-184906175	0.0188079	0	0.0492549	0.0358313	0.114845	0.107773	0.0546964	0.0168491	0
1700056E22Rik	chr1:185856910-185857877	0.369128	0.141781	0.257784	0.140647	0.128799	0.0705062	0	0	0
Dusp10	chr1:185858339-185899515	3.00964	2.45864	1.74497	2.99522	2.17474	2.27371	0.674945	0.724348	1.61133
1700112H15Rik	chr1:186351719-186381570	0	0	0.0856654	0	0	0	0	0	0
4930488B22Rik	chr1:186536375-186542868	0	0	0	0	0	0	0	0	0
Hlx	chr1:186551023-186556372	10.0599	8.82478	8.22498	10.853	12.7458	13.29	6.18277	4.88266	4.59096
2018-03-01	chr1:186610645-186635179	0.0581316	0.0837307	0.0761188	0.0553738	0.0253546	0.0832768	0.14088	0.0781159	0.127149
2018-03-02	chr1:186636946-186669726	28.9531	28.8007	24.3667	26.3332	23.2077	26.9785	21.1721	24.3448	23.6582
Mir1981	chr1:186646285-186646367	0	0	0	0	0	0	0	0	0
C130074G19Rik	chr1:186695804-186706915	0	0	0	0	0	0.00676946	0.0412271	0	0
Mark1	chr1:186720302-186823428	0.0968753	0.0620159	0.0676536	0.0492157	0.0901397	0.0308398	0.0688671	0.0462857	0.0791063
Rab3gap2	chr1:187028046-187110625	23.623	22.4845	21.5857	24.187	23.9748	22.8384	28.5101	24.9786	20.7551
Iars2	chr1:187110540-187153280	45.5737	44.2644	44.6182	41.755	34.5258	33.2038	61.4964	66.3613	64.3666
Snora36b	chr1:187066804-187066917	0	0	0	17.2777	0	17.3227	0	0	0
Mir664	chr1:187066853-187066922	0	0	0	0	0	0	0	0	0
Mir194-1	chr1:187137197-187137264	0	0	0	0	0	0	0	0	0
Mir215	chr1:187137459-187137570	0	0	0	0	17.0696	0	0	0	0
Bpnt1	chr1:187156037-187181648	18.9693	17.3367	16.4536	17.6453	10.418	12.8429	23.0419	22.8711	19.5728
Eprs	chr1:187186973-187252234	91.2721	92.5099	92.9904	78.3495	72.511	69.5679	155.648	154.452	121.734
9630028B13Rik	chr1:187253235-187265698	0.023456	0.0187696	0.0127974	0.0167575	0.0153458	0.0352822	0.0483182	0	0.0515611
Gm2061	chr1:187270994-187279447	0	0	0	0	0	0	0	0	0
Slc30a10	chr1:187278726-187292640	0	0	0	0	0	0	0	0	0
5033404E19Rik	chr1:187321184-187321893	0	0	0	0	0	0	0	0	0
Lyplal1	chr1:187911610-187941189	0.656424	0.0787908	0.071628	0.156321	0.0715762	0.117546	0	0	0
A730004F24Rik	chr1:188335716-188382560	0	0	0	0	0	0	0	0	0
Tgfb2	chr1:188447064-188529871	0.149515	0.119642	0.0435062	1.81588	4.83657	7.31811	0.0120782	0	0
Rrp15	chr1:188544964-188573237	74.0821	79.8212	66.4729	60.7828	57.5131	68.8851	84.2613	84.321	66.1337
D1Pas1	chr1:188791294-188794506	0.0842698	0.116884	0.024521	0.0178382	0.0898455	0.0178846	0.0181533	0.067105	0.0573441
Spata17	chr1:188872285-189039325	0	0.0624571	0	0	0	0	0	0	0
1700007P06Rik	chr1:188949016-188951731	0	0.0873817	0.0794379	0	0	0.086908	0.264642	0.163044	0.0796161
Gpatch2	chr1:189039389-189175308	2.77435	2.82589	2.76138	2.67978	2.43142	2.12959	2.19929	2.28797	2.43864
Esrrg	chr1:189432884-190038763	0	0	0	0	0.00964902	0	0	0	0
9330162B11Rik	chr1:189830454-189832869	0	0	0	0	0	0	0	0	0
Ush2a	chr1:190086716-190788918	0	0	0	0	0	0	0	0	0
Kctd3	chr1:190794976-190831719	9.57879	9.92452	8.96607	10.8112	9.35281	9.5786	12.6408	13.3116	11.5919
Kcnk2	chr1:191031808-191226152	0	0	0	0	0	0	0	0	0
Cenpf	chr1:191464492-191511965	10.7664	9.93704	9.9093	11.3327	15.1681	12.1379	6.57036	7.54046	11.9951
Ptpn14	chr1:191552146-191700572	0.0160332	0.0102638	0	0.0152725	0.013986	0.00510409	0.00518078	0	0.00467584
Smyd2	chr1:191704370-191746167	33.4519	35.0947	31.097	34.9671	29.8119	33.2149	47.8232	50.7869	46.7502
Prox1	chr1:191945657-191994559	0.186285	0.0825595	0.025018	0.259346	0.237499	0.191594	0	0.0128372	0
Rps6kc1	chr1:192596757-192735649	4.04159	3.86664	3.64484	6.93541	8.24357	7.62041	4.4076	5.00504	4.92702
Angel2	chr1:192748986-192770370	15.8833	16.5522	15.2216	17.5757	18.0527	17.778	12.6741	13.7727	14.0968
Vash2	chr1:192771524-192803175	0.350817	0.17576	0.106518	0.0726435	0.0931351	0.101967	0.0295683	0.0273253	0.0400314
Mfsd7b	chr1:192829710-192850069	7.47098	6.6864	4.8755	9.10642	6.37786	6.65016	13.3314	11.3454	5.66065
A230020J21Rik	chr1:192849229-192853660	2.02708	1.90906	1.36118	1.70812	1.83627	1.60087	2.98533	2.51441	1.67119
Spata45	chr1:192860700-192866820	0	0	0	0	0.219347	0.240147	0	0	0
Tatdn3	chr1:192869708-192886811	1.90666	2.66783	2.09244	1.60864	2.28099	2.65337	1.00334	1.56167	1.60622
Nsl1	chr1:192886899-192908437	8.26429	9.28227	8.36393	6.89508	9.33664	9.0563	6.10857	7.1693	8.02974
Batf3	chr1:192922292-192932822	0.110883	0.212949	0.483974	0.528112	0.870525	1.16487	0	0	0.0970121
Fam71a	chr1:192986462-192988696	0.0277485	0	0	0	0	0.0265009	0	0	0
Atf3	chr1:192994175-193007212	18.6282	8.33328	5.49447	18.3198	12.9775	14.3903	1.60241	2.59149	4.81149
Nenf	chr1:193130675-193141997	13.6478	9.53108	11.8055	9.573	6.38553	5.56915	3.72846	6.7801	6.62159
Tmem206	chr1:193149843-193176804	7.24594	6.69527	7.00642	6.36803	5.2671	5.49331	4.69877	4.44596	5.00678
Ppp2r5a	chr1:193175859-193220920	78.9359	84.631	86.8811	73.4759	83.1134	76.5083	81.9458	77.3777	71.0822
Dtl	chr1:193361234-193399423	16.4014	17.7549	17.3771	13.435	13.8053	11.9417	19.4617	20.9022	18.929
Ints7	chr1:193399514-193447569	19.6041	19.8354	21.2824	16.6615	17.1233	17.3052	28.544	26.4239	22.0471
Lpgat1	chr1:193541902-193608134	27.923	27.8079	30.3853	19.3484	22.7402	19.3116	24.9524	24.9213	23.3649
Nek2	chr1:193645351-193656928	23.6009	25.4638	21.202	24.4533	24.0844	24.9572	26.9377	28.4434	32.8006
1700034H15Rik	chr1:193717950-193731406	0.0821817	0.0484729	0.155809	0.0515109	0.089706	0.0994598	0.0724482	0.152326	0.052462
Slc30a1	chr1:193730659-193737126	2.91399	3.08872	2.12307	4.37715	4.04753	4.24939	4.3567	3.87559	2.63772
Rd3	chr1:193801250-193812163	0.0163386	0.0470822	0.0142627	0.0155634	0.0285117	0	0	0	0
Traf5	chr1:193821083-193916480	1.77323	1.39056	0.928761	1.74541	1.90774	1.60882	0.458385	0.291234	0.155141
Mir3473c	chr1:193822434-193822515	0	0	0	0	0	0	0	0	0
Rcor3	chr1:193922428-193961922	7.51104	6.75855	4.89735	8.2397	9.45152	8.28296	6.73972	7.57078	6.98021
Gm10516	chr1:193960779-193974907	0.347046	0.401254	0.333175	0.496845	0.439411	0.5585	0.32702	0.368391	0.477599
Kcnh1	chr1:194014658-194334041	0.0161935	0	0	0	0.00705949	0	0.0156978	0	0
Hhat	chr1:194336709-194597413	0.0428199	0.0411175	0.0373796	0.0815771	0.0560288	0.061342	0	0	0
1700065J18Rik	chr1:194667898-194668933	0	0	0	0	0	0	0	0	0
Sertad4	chr1:194670681-194681946	0	0	0	0	0	0	0	0	0
Gm15867	chr1:194681121-194683049	0	0	0	0	0	0	0	0	0
Syt14	chr1:194717427-194861969	0	0	0	0	0	0	0	0.00656166	0
Diexf	chr1:194930596-194956445	6.24012	6.7208	5.73255	5.32157	4.6618	4.52	9.01234	8.58363	7.35929
Irf6	chr1:194979305-194998229	0.201178	0.248373	1.3924	0.0136881	0.112815	0.0411712	0.0835796	0.205972	0.226301
A130010J15Rik	chr1:194999662-195004026	2.49483	2.46872	3.08294	2.61908	2.32222	2.27356	2.58462	3.37633	3.28849
Traf3ip3	chr1:195001697-195027740	24.5652	25.3662	21.8289	30.9572	36.7055	35.6681	23.7847	24.1127	20.3611
Hsd11b1	chr1:195047834-195090239	7.1951	9.24792	6.88325	21.0777	56.5235	43.8224	22.9789	9.71281	14.2286
G0s2	chr1:195098353-195099382	7.40472	8.38003	8.23382	4.1145	8.76614	3.11495	41.2737	49.4355	101.727
Lamb3	chr1:195128187-195170072	0.517179	0.581754	0.954541	0.548947	1.23744	0.987864	0.701891	0.450077	0.452483
Camk1g	chr1:195172539-195196476	0	0.0240507	0	0	0.0218485	0	0.121399	0.11219	0.06574
Mir205	chr1:195333656-195333724	0	0	0	0	0	0	0	0	0
4930503O07Rik	chr1:196038380-196048953	0	0	0	0	0	0	0	0	0
Plxna2	chr1:196446022-196643062	0.218433	0.319618	0.0499403	0.183301	0.435527	0.720209	0.0252079	0.0465914	0.0318515
Mir3962	chr1:196648194-196648258	0	0	0	0	0	0	0	0	0
Cd34	chr1:196765014-196787486	3.27146	7.73738	60.2125	0.0237283	0.0217295	0	0	0	0
Gm16897	chr1:196781952-196803153	0.0492607	0.42572	2.04259	0.0234619	0	0	0.0238763	0	0.0430985
A330023F24Rik	chr1:196843592-196864102	0.0112863	0.0541878	0.0197046	0.0537542	0.0295356	0.053894	0.0109408	0.0101108	0.00987443
Mir29b-2	chr1:196863233-196863314	0	0	0	0	0	0	0	0	0
Mir29c	chr1:196863740-196863828	0	0	0	0	0	0	0	0	0
Cd46	chr1:196868093-196918442	0.111653	0.0536072	0.0974676	0.106357	0	0.106633	0.0541177	0.0500124	0.0976864
Cr1l	chr1:196929981-196957764	29.2078	28.3063	32.006	38.4947	37.0045	41.5467	24.0816	25.3352	26.264
Cr2	chr1:196963004-197002909	0.00938361	0.00901054	0	0	0.00818548	0.00896169	0	0	0
Cnksr3	chr10:3134303-3227479	4.68835	5.28563	3.30446	7.36052	8.01284	7.36308	5.97561	6.02009	7.86951
Oprm1	chr10:3308331-3587948	0	0	0	0	0	0	0	0	0
Ipcef1	chr10:3323355-3460176	0.350144	0.352835	0.266205	1.44415	1.98438	1.58553	0.52198	0.371717	0.405788
Rgs17	chr10:4424140-4520877	0	0	0	0	0	0	0	0	0
Mtrf1l	chr10:4522597-4534654	5.05731	4.72197	5.71682	4.52879	4.8995	4.82992	4.3151	4.88553	3.79258
Fbxo5	chr10:4541075-4547383	28.9378	30.7904	31.4423	26.9123	27.1741	27.7877	23.5214	25.3258	28.8381
Vip	chr10:4698926-4707323	0	0	0	0	0	0	0	0	0
Myct1	chr10:4739751-4752813	0	0	0	0	0	0	0	0	0
Syne1	chr10:4795848-5009592	0.407223	0.790047	2.5029	0.30874	1.01494	0.666709	2.74719	3.18652	4.26812
Syne1	chr10:5151833-5326342	7.62223	10.1537	32.4964	14.8879	32.504	27.3362	20.5499	25.2322	26.3986
Esr1	chr10:5340907-5734552	2.73296	1.94402	1.29995	3.7519	3.70326	3.5939	1.66006	1.8112	1.34534
Ccdc170	chr10:5785429-5836669	0.0289314	0	0	0	0.0504748	0.0276306	0.0280458	0.103673	0.0253123
Armt1	chr10:5891400-5913936	24.0062	24.1409	21.8519	22.5844	22.9433	21.4826	16.9627	18.2886	19.7274
Rmnd1	chr10:5914188-5943372	14.056	13.1754	13.4947	12.3946	12.3952	11.9522	11.0205	11.4421	14.7096
Gm5512	chr10:5917374-5943370	0.000714612	0.816426	0.00177088	0.000355185	0.00112395	0.000894395	0.000139485	0.000268875	0.000429532
Zbtb2	chr10:5958432-5979467	7.99386	8.37387	7.41741	10.0996	9.41135	9.64537	10.2238	10.8505	10.1403
Akap12	chr10:5987069-6080212	0.605897	0.563907	0.626563	0.710342	0.902574	1.01487	1.22891	1.69519	1.19885
Mthfd1l	chr10:6179459-6373466	61.5185	64.2295	54.0097	40.4517	29.7713	28.6139	73.8186	78.791	63.382
Plekhg1	chr10:6379238-6606164	2.14274	1.76266	0.93571	4.82496	5.8506	5.3485	3.10182	1.55351	2.26974
Iyd	chr10:6791663-6806262	0	0	0	0	0	0	0	0	0
Ppp1r14c	chr10:6881565-6980391	16.1219	11.261	4.02708	0.0346922	0	0	0.0470734	0	0.0743495
H60c	chr10:7078769-7090333	0.0107787	0.0207004	0.0188185	0.0205348	0.00940247	0	0	0	0
B020014A21Rik	chr10:7213347-7221452	0.0649706	0	0.255222	0.0464162	0.0141687	0.0310247	0.157454	0.0727549	0.0568432
Lrp11	chr10:7309597-7345275	0.370474	0.304924	0.231003	0.773016	0.353949	0.640239	0.273625	0.379302	0.108043
Pcmt1	chr10:7350033-7383382	23.5775	24.2821	26.8971	25.4973	26.1032	26.3488	22.2182	21.7995	20.0815
A630066F11Rik	chr10:7383168-7384421	0.966564	1.03126	1.21876	1.53452	1.73314	1.43594	0.416433	0.721581	0.516788
Nup43	chr10:7387301-7398684	21.5254	23.5086	25.2201	16.601	15.3836	15.9507	26.2465	25.5566	21.6463
BC020402	chr10:7398768-7400956	0.14196	0.136316	0.123923	0.297495	0.421035	0.298269	0.137614	0.254349	0.173882
Lats1	chr10:7401006-7436259	12.6061	10.94	11.4183	12.8117	12.3562	11.0955	16.9868	16.6267	14.579
Katna1	chr10:7445797-7482948	30.1009	29.0419	34.1172	24.711	28.1655	29.0043	27.094	30.7241	35.1035
Ginm1	chr10:7487744-7500715	13.9887	15.7113	16.5726	18.5599	18.5944	21.6698	12.269	13.5388	14.3514
Ppil4	chr10:7512691-7542361	28.2276	29.0745	23.0703	24.3172	23.1084	20.5435	26.4913	29.318	25.3922
Zc3h12d	chr10:7552267-7590195	0.234647	0.0973596	0.202306	0.510497	0.416954	0.553325	0.156663	0.259517	0.0401295
Mir5104	chr10:7556178-7556272	0	0	0	0	0	0	0	0	0
Tab2	chr10:7625445-7675921	48.9048	45.427	50.8023	46.4004	43.9752	42.6256	49.4316	51.4787	49.1139
Ust	chr10:7924550-8238623	0.0138063	0	0	0	0	0	0	0	0
Sash1	chr10:8442016-8605868	10.6461	9.7423	3.84703	11.5403	9.70921	10.0287	0.219079	0.441073	0.918015
Samd5	chr10:9347056-9395006	1.20478	1.51103	0.55805	10.8673	12.4827	9.53362	1.66843	2.88548	2.15116
Gm6150	chr10:9404519-9411707	0	0	0	0	0	0	0	0	0.0177533
Stxbp5	chr10:9475344-9620838	24.3482	25.3011	28.4893	23.8343	26.5353	23.9327	30.9287	31.8083	30.2367
Adgb	chr10:10055500-10192112	0.089876	0.0323635	0.0196143	0.342449	0.254801	0.354069	0.0108906	0.0805154	0.0294874
Rab32	chr10:10264836-10278005	40.9835	40.1143	26.314	57.1377	63.8518	68.2492	21.0746	20.567	25.3874
Gm5177	chr10:10325742-10336111	8.78503	9.55453	9.19491	6.95853	6.34628	6.62785	7.29189	7.25473	10.9322
Grm1	chr10:10405856-10802129	0.0152644	0.00316318	0.00329522	0.0160083	0.0161264	0.00119683	0.0109942	0.00225077	0.00146189
4930567K20Rik	chr10:10470843-10477929	0	0	0	0	0	0	0	0	0
Shprh	chr10:10869227-10935071	7.35144	6.7211	6.54822	6.22367	6.23123	5.84778	7.90664	7.58925	6.99246
Fbxo30	chr10:11001127-11017767	7.67114	8.09334	7.74734	11.7745	7.70057	9.78333	10.7197	10.3612	9.46843
Epm2a	chr10:11063242-11177275	1.22315	0.92725	0.280985	0.245288	0.112313	0.245926	0.187216	0.346028	0.675877
Utrn	chr10:12101985-12581533	3.87158	3.89088	4.03786	6.14211	6.79484	6.07415	2.32268	2.85507	5.25694
B230208H11Rik	chr10:12636443-12642925	1.07955	1.37889	0.824164	3.22841	5.33758	5.85583	4.94733	5.03785	1.4364
Stx11	chr10:12659786-12684065	10.7639	11.5856	8.29884	14.7407	16.3415	15.8428	4.3033	5.89986	8.18977
Sf3b5	chr10:12728255-12728989	98.4155	93.074	105.302	87.7736	81.3995	87.5959	109.208	117.776	102.47
Plagl1	chr10:12810593-12851501	0.0556948	0	0.0388949	0	0	0.0212763	0.021596	0.209556	0.00974555
Hymai	chr10:12810650-12815706	0	0.011148	0	0	0	0.0110876	0	0	0
Zc2hc1b	chr10:12869449-12897829	0	0	0	0	0	0	0	0	0
Ltv1	chr10:12898443-12912943	43.3636	48.7985	55.2092	40.4144	38.4551	36.4607	45.2133	49.3335	43.1384
Phactr2	chr10:12927522-13194202	6.63829	6.61463	3.75347	4.21648	4.08485	2.84448	2.03347	2.2512	0.402517
Fuca2	chr10:13220833-13237081	31.109	28.9779	21.2558	56.9341	56.6849	50.9708	19.9055	18.6511	12.2617
Pex3	chr10:13243647-13272948	6.14556	7.37009	6.77039	7.56033	8.13654	7.61226	9.54751	10.8908	11.4583
Adat2	chr10:13272712-13283182	4.28446	5.49993	3.66137	4.85448	4.56357	4.5656	5.72718	6.5856	5.44519
Aig1	chr10:13372514-13588636	0.0662695	0	0	0	0.057808	0	0	0	0
Hivep2	chr10:13686184-13871184	0.0235591	0.0226225	0.0102829	0.145869	0.241474	0.269998	0.011419	0.0474872	0.185508
Adgrg6	chr10:14122390-14264842	0.0715185	0.343376	0.491652	0	0.0155967	0	1.33459	1.59374	0.046929
Vta1	chr10:14375138-14425295	30.7525	31.1221	37.8554	29.7722	29.8065	32.5851	26.0603	24.6236	23.6962
1700016L04Rik	chr10:14425414-14478825	0	0	0.0696489	0	0.0695986	0	0	0	0
Gje1	chr10:14435431-14438020	0.486408	0.22395	0.484451	0.273323	0.351576	0.273632	0.461892	0.347895	0.545109
Nmbr	chr10:14480094-14490362	0	0.11164	0.0507455	0	0	0	0.0563517	0	0
C330004P14Rik	chr10:15511582-15526871	0	0	0	0	0	0	0.128783	0	0
Gm20125	chr10:16670899-16815588	0	0.0338381	0	0	0	0	0	0	0
Cited2	chr10:17443033-17445480	147.079	173.517	243.69	113.881	134.383	124.205	126.845	140.281	151.898
Txlnb	chr10:17516024-17565469	0.317495	0.145965	0.18923	0.713972	0.511824	0.333577	0.0731837	0.0742627	0.0139055
Heca	chr10:17620271-17667873	8.53973	8.85623	10.1952	10.2573	9.19463	8.83929	8.92481	7.06744	8.68113
Abracl	chr10:17731066-17743058	165.355	176.93	161.17	185.359	175.105	210.56	104.245	104.01	102.475
Reps1	chr10:17775745-17844961	34.9213	34.5686	39.8239	33.8399	26.3614	32.9157	26.2266	27.2299	24.8321
Ect2l	chr10:17848827-17930696	0.0417876	0	0.109435	0	0	0.0798174	0	0	0
Ccdc28a	chr10:17933490-17954787	1.93229	2.19282	4.03807	1.95217	1.8388	2.01317	7.77636	9.17977	6.96721
Nhsl1	chr10:18127480-18253697	0.239096	0.180621	0.544731	0.0406918	0.00745207	0.0236451	0.0230209	0.0535773	0.0448505
Hebp2	chr10:18259928-18265882	0.264148	0.22194	2.30587	0	0	0.0315339	0.0640153	0.0591592	0.0288881
Arfgef3	chr10:18307816-18463564	0.998357	0.560346	3.68859	2.3507	0.950612	1.3832	0.0477082	0.0629844	0.00615119
Gm4922	chr10:18499532-18506599	0.0785629	0.0754394	0.0228604	0.124726	0.0456878	0.0500203	0.0507719	0.0234602	0.0229117
4930444F02Rik	chr10:18517104-18551736	0.155758	0	0.815728	0.0335357	0.219023	0.033623	0	0.202615	0
Perp	chr10:18564876-18576878	0.730689	1.11624	60.1032	0.0316375	0	0	6.98662	9.99735	11.0422
Tnfaip3	chr10:18720716-18735216	5.33698	3.89574	2.86203	9.21893	5.619	6.18862	0.699247	0.879749	1.39074
Gm20139	chr10:18861554-18927753	0	0.000940934	0.00130662	0	0.00223496	0	0.00618586	0.0013409	0.00171653
Olig3	chr10:19076344-19078410	0	0	0	0	0	0	0	0	0
Ifngr1	chr10:19311763-19330031	140.378	146.914	84.5667	102.982	157.68	140.667	64.2871	69.5295	81.5316
Il22ra2	chr10:19341833-19354487	0.0995222	0.191131	0.195475	0.0237002	0.195334	0.142571	0.265308	0.401207	0.130609
Il20ra	chr10:19432392-19479859	0	0.0287102	0.861306	0	0	0	0	0.0267849	0.0261587
Slc35d3	chr10:19567722-19571265	0	0	0.223052	0.0221267	0	0	0	0.0208094	0.0203229
Pex7	chr10:19579895-19627480	9.89932	10.882	17.4067	9.39794	9.79837	10.0778	7.46377	9.25649	8.98176
Map3k5	chr10:19654331-19862556	1.47636	0.95901	6.93671	4.36374	4.12872	4.83126	2.37826	1.52683	1.12072
Map7	chr10:19868725-20001396	1.01382	1.10629	13.8387	1.65347	2.66658	2.83142	4.60132	3.45411	7.09614
4930405J17Rik	chr10:19919052-19921660	0	0	0	0	0	0	0	0	0
Gm6251	chr10:19928244-19928836	166.661	183.99	212.464	184.522	174.508	184.194	211.941	234.555	308.688
Mir6413	chr10:20017386-20017494	0	0	0	0	0	0	0	0	0
Bclaf1	chr10:20032274-20062307	55.9601	53.7479	57.9329	53.2001	51.1022	49.7253	75.3335	79.1181	55.3276
Mtfr2	chr10:20067624-20081475	25.7005	27.1351	27.6923	17.1203	18.4664	17.8555	9.9707	7.99055	11.1549
Pde7b	chr10:20117809-20444874	0.976401	0.730763	0.839812	2.02429	1.54063	1.23419	0.222708	0.205814	0.23869
Ahi1	chr10:20672352-20800235	1.27278	1.53646	1.95761	1.13158	1.52266	1.37763	1.13981	1.18366	1.39325
Myb	chr10:20844735-20880790	160.133	174.828	163.95	110.145	147.444	133.158	94.2384	111.72	82.5763
Hbs1l	chr10:21015784-21088695	39.2347	38.3399	45.1629	44.1711	43.832	44.6573	52.0591	52	50.9295
4930455C13Rik	chr10:21038893-21061861	8.60197	10.4582	10.4158	10.9032	11.2555	12.5878	13.3822	13.8585	11.2282
Aldh8a1	chr10:21097105-21116384	0.0552521	0.0265277	0.0241161	0.0263155	0.0240987	0	0.107121	0.0247488	0.0241702
1700020N01Rik	chr10:21312950-21342181	0	0	0	0	0.0573358	0.251092	0	0	0.057506
Gm5420	chr10:21410650-21413784	0	0	0	0	0	0	0	0	0
Sgk1	chr10:21601989-21719708	27.2659	13.5816	9.56532	86.0879	58.9558	63.0195	16.5533	17.1002	11.342
4930444G20Rik	chr10:21786114-21787885	0.0269605	0.0115061	0.0313801	0.011414	0	0	0.191658	0	0.0497967
E030030I06Rik	chr10:21832855-21869076	2.62567	2.31289	1.76379	3.28376	3.73177	4.09282	1.46129	2.32173	1.57847
Raet1a	chr10:21878414-22093945	0.889839	0.301618	0.476717	0.876313	0.851176	0.88317	0.278333	2.37117e-40	0.259892
Raet1e	chr10:21893326-21903720	1.57737	0.696377	0.433848	2.00977	2.09963	2.45811	0.354926	0.000470907	0.467869
Raet1b	chr10:21893680-22093919	2.59283e-07	5.87912e-06	3.47781e-06	2.06966e-05	1.36301e-05	0.00634024	2.51403e-05	7.08606e-15	0.08072
Raet1c	chr10:21893707-22093945	1.22177e-05	6.32681e-06	1.29552e-06	0.302785	0.671131	4.15503e-15	0.280174	0.684745	0.176108
Raet1d	chr10:22081699-22093945	1.52321	0.798234	0.486592	1.71999	1.97871	2.36823	0.456452	0.425645	0.710645
H60b	chr10:21993279-22008654	1.1311	0.217227	0.197479	0.287318	0.394672	0.360082	0.146197	0.0675533	0.263896
C920009B18Rik	chr10:22026525-22032748	4.67781	2.84818	2.73753	3.97047	3.37385	3.33501	1.07665	0.72575	1.76052
Gm10825	chr10:22122618-22127276	0.136156	0.0373551	0.0339592	0.0370562	0.050902	0.0866895	0	0.0116167	0.0226903
Slc2a12	chr10:22364816-22423686	0	0.0152024	0	0	0.262397	0.01512	0	0	0
Tbpl1	chr10:22423682-22451253	15.353	14.8844	13.789	15.4081	14.147	15.0656	15.3124	14.8309	16.9013
Mir7663	chr10:22449177-22449238	0	0	0	0	0	0	0	0	0
Tcf21	chr10:22537078-22539934	0	0	0	0	0	0	0	0	0
Eya4	chr10:22823973-23069709	0	0	0	0.0275519	0.050462	0.0828708	0	0	0
Rps12	chr10:23504988-23507015	2773.86	2914.33	3250.17	2787.65	2326.43	2606.35	3564.2	4018.18	3263.69
Snora33	chr10:23505152-23505257	24.8808	23.8916	21.7196	0	0	47.5242	96.4766	44.579	21.7684
Snord100	chr10:23505559-23505627	491.951	1417.18	429.448	1640.14	0	1409.5	1192.23	2644.29	1076.03
Slc18b1	chr10:23516791-23547774	0.517931	0.42698	0.522761	0.412379	0.410248	0.348816	0.44237	0.273771	0.576239
Vnn3	chr10:23571267-23589649	0	0	0	0	0	0	0	0	0
Vnn1	chr10:23614493-23625149	0	0	0	0	0	0	0	0	0
Taar1	chr10:23640211-23641210	0	0	0	0	0	0	0	0	0
Taar2	chr10:23658377-23661389	0	0	0	0	0	0	0	0	0
Taar3	chr10:23669363-23670395	0	0	0	0	0	0	0	0	0
Taar4	chr10:23680299-23681343	0	0	0	0	0	0	0	0	0
Taar5	chr10:23690511-23691525	0	0	0	0	0	0	0	0	0
Taar6	chr10:23704414-23705452	0	0	0	0	0	0	0	0	0
Taar7a	chr10:23712210-23713287	0	0	0	0	0	0	0	0	0
Taar7b	chr10:23719744-23720821	0	0	0	0	0	0	0	0	0
Taar7d	chr10:23747027-23748104	0	0	0	0	0	0	0	0	0
Taar7e	chr10:23757419-23758496	0	0	0	0	0	0	0	0	0
Taar7f	chr10:23769315-23770392	0	0	0	0	0	0	0	0	0
Taar8a	chr10:23796305-23797340	0	0	0	0	0	0	0	0	0
Taar8b	chr10:23811065-23812100	0	0	0	0	0	0	0	0	0
Taar8c	chr10:23820648-23821757	0	0	0	0	0	0	0	0	0
Taar9	chr10:23828293-23829340	0	0	0	0	0	0	0	0	0
Stx7	chr10:23869122-23908765	45.5838	46.5514	34.3096	56.6954	72.8284	66.2386	26.3751	25.1875	31.5103
Moxd1	chr10:23943322-24022589	0.0195657	0	0	0.0186375	0	0	0	0	0
Ctgf	chr10:24315247-24318488	0	0	0	0	0	0	0	0	0
Enpp1	chr10:24357719-24431965	0.239866	0.427764	2.86758	0.344147	1.04643	0.558654	0.3654	0.177234	0.472198
Enpp3	chr10:24493619-24556001	0	0	0	0	0	0	0	0	0
Med23	chr10:24589791-24633335	10.219	10.6758	11.2419	9.60927	10.1104	9.54315	10.7227	10.3978	10.8707
Mir6905	chr10:24630469-24630539	0	0	0	0	0	0	0	0	0
Arg1	chr10:24635012-24647276	3.62844	1.01976	2.1245	4.46791	0.115798	0.169039	0.0428947	0.0396407	0
Akap7	chr10:24888895-25018969	0.752606	1.00064	0.774906	1.80145	3.28255	1.972	0.542498	0.587784	1.58706
Epb4.1l2	chr10:25079603-25243324	16.9513	14.4477	11.8677	18.2466	16.3782	17.1492	11.403	13.9124	21.006
Smlr1	chr10:25247748-25256078	0	0	0	0	0	0	0	0	0
4930401C15Rik	chr10:25499119-25557243	0	0	0	0	0	0	0	0	0
Tmem200a	chr10:25710991-25798858	0	0	0	0	0	0	0	0	0
Gm9767	chr10:25798060-25799253	0	0	0	0	0	0	0	0	0
Samd3	chr10:25949512-25991978	0	0	0.020353	0	0	0	0	0	0
L3mbtl3	chr10:25995257-26094991	11.3116	10.3222	9.65978	7.96411	8.02868	8.18613	3.95024	4.3272	7.53002
Gm8709	chr10:26393251-26394457	0.304507	0.139453	0.200387	0.102637	0.497744	0.143171	0.186194	0.491028	0.28281
Arhgap18	chr10:26492317-26638454	10.1697	10.0349	13.23	11.307	14.3437	13.6069	3.56887	4.86586	8.68089
Lama2	chr10:26701091-27336748	0.00592447	0	0.0155152	0.0507907	0.0206721	0.0339485	0.0057431	0.00530744	0
4930579H20Rik	chr10:27109671-27117031	0	0	0	0	0	0	0	0	0
Ptprk	chr10:27794625-28317203	0.46525	0.181116	0.148186	0	0.0027422	0	0	0	0.0495061
Themis	chr10:28388165-28603624	0.167797	0.186402	0.140307	0.0639682	0.0528686	0.0425971	0.0339522	0.107116	0.17367
4930519F09Rik	chr10:28641768-28643313	1.15188	1.16373	0.998914	0.760242	1.25906	1.44403	0.983249	1.14868	0.960262
2310057J18Rik	chr10:28692093-28706112	0.0505195	0.048511	0	0	0	0	0	0	0
Soga3	chr10:28863801-28919434	0	0	0	0	0	0	0	0	0
9330159F19Rik	chr10:28931448-28950585	0.00865771	0.0141613	0.00271174	0.0228974	0.0594396	0.0460592	0.0225849	0.0252521	0.00371669
Echdc1	chr10:29032971-29066467	6.23662	5.97348	4.59915	5.18839	4.40667	3.66048	4.08963	4.7553	6.96619
Rnf146	chr10:29063981-29082248	22.7416	22.1498	19.7533	22.5448	21.4276	20.3967	19.5922	20.3252	24.5994
Rspo3	chr10:29172912-29255673	0.0256978	0	0	0.293744	0.269	0.539932	0	0	0
Cenpw	chr10:29915814-29920346	9.00064	10.421	9.02249	12.0195	11.5329	13.2846	13.5677	12.6928	10.3615
Trmt11	chr10:30254030-30320555	6.87456	7.12834	7.96348	6.42393	5.58637	6.09115	13.8097	12.6684	9.6508
Gm20300	chr10:30323000-30326440	1.03283	1.06698	1.07635	1.20768	1.35902	1.48789	0.573727	0.436639	0.540653
Hint3	chr10:30328012-30338172	2.97671	2.85836	3.79782	4.14418	6.69132	4.59232	1.66476	2.35899	1.803
Ncoa7	chr10:30365387-30522913	7.41047	8.55589	6.57023	8.68564	7.79212	6.91303	9.17995	5.36507	6.25386
Hey2	chr10:30552164-30562589	0	0	0	0	0	0.0231086	0	0	0
Hddc2	chr10:31033210-31047892	10.7397	14.2063	13.1061	11.2741	6.78731	9.94281	12.8543	15.5116	12.8479
Tpd52l1	chr10:31052185-31165727	0.0529908	0.152652	0	0	0	0.101216	0.102737	0	0
Gm3258	chr10:31133531-31134241	4.45284	5.07753	4.17863	4.08254	4.02995	4.89053	5.7194	4.98635	3.40884
Rnf217	chr10:31221692-31329531	12.4069	12.321	10.5714	10.5052	8.12172	8.87163	7.97697	6.38387	6.30884
Nkain2	chr10:31409124-32609721	0	0	0	0	0	0	0	0	0
Trdn	chr10:32803288-33196515	0	0	0	0	0	0	0	0	0
D830005E20Rik	chr10:32942150-32976163	0.0686945	0.0659634	0.0299833	0	0	0.0328029	0	0.06154	0.0300506
Clvs2	chr10:33232139-33344406	0	0	0	0	0	0	0	0	0
Gm4794	chr10:33486229-33501921	0	0	0	0	0	0	0	0	0
Sult3a1	chr10:33577527-33599281	0	0	0	0	0	0	0	0	0
Rsph4a	chr10:33624916-33635827	0.0163464	0	0	0	0	0	0.047538	0	0
Zufsp	chr10:33646741-33671018	4.77237	5.15859	5.50917	5.46509	5.43695	6.00233	3.23586	3.8548	4.88268
A830082N09Rik	chr10:33707021-33714861	0.106965	0.1582	0.097131	0.0796383	0.0775414	0.0634067	0.0703187	0.0718132	0.0580867
Rwdd1	chr10:33716360-33739422	77.3081	79.2246	73.7025	70.6461	63.072	69.6044	90.2408	81.2112	82.9049
Trappc3l	chr10:33757402-33829621	0	0	0	0	0	0	0	0	0
Fam26d	chr10:33758589-33764119	0	0	0	0	0	0	0	0	0
Fam26e	chr10:33811157-33816325	0	0	0	0	0	0	0	0	0
Fam26f	chr10:33845872-33847778	0.898186	0.616055	0.672059	0.4889	0.111929	0.183814	0.310961	0.172423	0.392914
Dse	chr10:33871198-33927357	11.5153	7.35821	4.04781	8.98071	4.9003	5.32485	1.6975	0.96634	4.90259
Tspyl1	chr10:34001995-34004691	22.5271	21.7292	22.2037	19.399	17.8273	17.64	12.3285	14.1446	15.7716
Tspyl4	chr10:34017226-34021126	0.365777	0.263426	0.332609	0.391978	0.332369	0.422108	0.103419	0.0955739	0.0400026
Nt5dc1	chr10:34023417-34138334	17.4236	20.1977	17.9113	10.7656	12.4799	10.1726	5.15185	7.51319	10.9278
Col10a1	chr10:34109786-34116891	0.0577543	0.0369721	0.033611	0.0916906	0.05038	0.147087	0.0186621	0.0172464	0.0505296
Frk	chr10:34203205-34331036	0.0126748	0	0	0	0	0	0.0737377	0.0227126	0.0665509
Hs3st5	chr10:36226612-36554200	0	0	0	0	0	0	0	0	0
Hdac2	chr10:36694349-36721694	58.9269	61.4222	65.2904	49.6329	48.9188	48.8953	60.7937	67.0314	62.1788
Marcks	chr10:36853048-36858732	0.57999	0.326008	1.07435	2.00777	2.45564	2.013	0.425104	0.519584	0.160895
4930591E09Rik	chr10:37895579-37901709	0	0	0	0	0	0	0	0	0
Rfpl4b	chr10:38540346-38541585	0	0	0	0	0	0	0	0	0
Lama4	chr10:38685320-38829994	0	0	0	0	0	0	0	0	0
Fam229b	chr10:38838613-38853701	0	0.616986	0.560896	0.204016	0.0934151	0.30682	0.10381	0.287806	0.187385
Tube1	chr10:38853828-38870864	2.93534	3.29503	3.01353	2.57949	2.65071	2.78362	3.2663	3.83333	3.92457
Wisp3	chr10:38870776-38883600	0	0.222775	0.0405046	0.0441985	0.0404753	0	0.0899587	0.0831345	0.121786
Fyn	chr10:39089604-39285180	0.381771	0.316602	2.59447	0.0826439	0.0908198	0.149152	0.575647	0.202094	0.0910898
Traf3ip2	chr10:39332739-39375113	0.592276	0.365611	0.4247	0.604476	0.867237	0.646452	1.31233	2.27396	3.36821
E130307A14Rik	chr10:39341216-39451813	0.848799	0.629814	0.707277	0.404266	0.673111	0.221082	0.52361	0.483889	0.540087
Rev3l	chr10:39451965-39595011	4.29164	3.70737	4.12713	4.58559	5.0401	4.0164	4.6666	4.54897	4.17879
AA474331	chr10:39612565-39619044	2.81481	2.26543	1.87484	1.76685	1.2348	0.870183	0.757078	0.874559	1.67975
2010001E11Rik	chr10:39640187-39646729	0.184968	0.359561	0.204788	0.176193	0.0944493	0.198194	0.183679	0.169745	0.280242
G630090E17Rik	chr10:39666717-39679959	0.238859	0.262794	0.169028	0.260692	0.108986	0.113639	0.121114	0.0479684	0.301903
BC021785	chr10:39677866-39706452	0.335425	0.229455	0.115652	0.155983	0.215952	0.154063	0.127383	0.116213	0.15165
AI317395	chr10:39721378-39745074	0.295873	0.244043	0.139075	0.180664	0.158828	0.282569	0.187533	0.142723	0.199124
Slc16a10	chr10:39753340-39862060	16.4562	15.6292	11.0601	13.8302	11.8159	12.5064	18.7172	16.7916	13.0079
Rpf2	chr10:39943051-39966845	43.3493	49.0446	57.4579	32.4633	29.0355	28.2053	72.3637	71.7388	53.6457
Gtf3c6	chr10:39969008-39977471	41.3494	46.5329	41.8808	37.0863	34.3837	35.139	41.0873	42.9178	37.3243
Amd1	chr10:40007263-40021994	0.0587257	19.9093	0.0420522	0.0368778	8.55479	8.68406	0.0432197	0.0380841	0.0523854
Amd2	chr10:40007270-40021992	75.6558	59.0245	86.5894	66.4924	51.064	55.368	88.1497	98.2238	80.1294
Cdk19	chr10:40069113-40203624	10.6839	11.2143	11.9128	12.4446	14.2492	12.8815	8.95275	8.13652	9.58106
Slc22a16	chr10:40290167-40323938	0	0	0	0	0	0	0	0	0
Ddo	chr10:40349816-40369737	0	0	0	0	0	0	0.0195298	0	0
Mettl24	chr10:40403087-40530889	0.0425127	0.16329	0.0371114	0.0809918	0.0370846	0.0406012	0	0	0
Cdc40	chr10:40551426-40602949	31.0508	31.219	30.838	26.3196	25.6409	23.2235	34.1758	30.897	28.694
Wasf1	chr10:40603339-40658375	0.168076	0.253619	0.230563	0.365949	0.146616	0.114657	1.4431	1.09702	1.17641
Gpr6	chr10:40790298-40791390	0	0	0	0	0	0	0	0	0
Fig4	chr10:40907977-41023047	16.7203	18.3365	23.0834	18.2074	22.8419	19.5913	51.3743	54.6201	41.0183
Zbtb24	chr10:41170163-41185388	5.48918	5.93423	5.78405	5.80026	5.41212	6.13498	4.85867	5.48566	4.63559
Mical1	chr10:41196119-41206836	26.4981	27.2013	35.1743	27.6352	35.868	31.285	22.1915	25.2001	28.818
Smpd2	chr10:41206977-41210146	6.7692	5.9584	6.08502	6.29454	6.11577	6.58028	7.14786	9.06019	7.43827
Ppil6	chr10:41210244-41234094	0	0.0624591	0.283905	0.0619593	0.11348	0	0.0630539	0.0582707	0.0569084
Cd164	chr10:41239305-41250848	155.689	133.124	112.633	154.066	114.666	121.709	79.7037	83.4771	74.9945
Ccdc162	chr10:41258654-41326401	0.0567458	0.181633	0.0660481	0.0720717	0.0825005	0.198713	0.0550087	0.0508358	0.0496473
5730435O14Rik	chr10:41287821-41296282	0.272776	0	0.357178	0.129917	0.118973	0	0	0	0
Cep57l1	chr10:41438645-41529674	7.14416	6.80197	7.51888	6.44795	5.80094	5.27326	6.21715	6.64464	7.61816
Sesn1	chr10:41530379-41628242	9.92585	9.81167	10.0816	9.31555	10.2453	10.0045	5.53549	5.1953	6.40841
Armc2	chr10:41634796-41738188	0.0241759	0.034822	0.0105521	0.0115145	0	0.0230888	0.0117179	0.010829	0.0317274
Foxo3	chr10:41905591-41996548	22.3011	20.1856	18.9549	17.3062	17.953	14.5462	17.0832	16.727	14.7024
Lace1	chr10:42032390-42198371	3.58616	3.37331	2.89627	4.1829	4.12847	4.12388	2.67232	2.53517	3.28696
Snx3	chr10:42221859-42255175	181.089	177.302	160.303	173.962	170.702	196.199	164.513	158.486	158.226
Nr2e1	chr10:42281776-42303394	0	0	0	0	0	0	0	0	0
Ostm1	chr10:42398721-42422268	30.424	29.7351	25.6119	36.7471	39.8354	40.7169	9.34421	11.5858	10.8054
Sec63	chr10:42481301-42552320	28.0407	27.2967	29.0022	31.3769	29.5019	31.1641	24.4356	23.5089	23.6036
Scml4	chr10:42580317-42680588	0.231554	0.113159	0.0712886	0.171425	0.177101	0.175236	0.204424	0.159283	0.19671
Sobp	chr10:42722305-42894336	0.448185	0.407715	0.12355	0.123583	0.174903	0.11264	0.0114333	0.010566	0.0103189
9030612E09Rik	chr10:42894504-42896371	0	0.0325255	0	0	0	0	0	0	0
Pdss2	chr10:42941291-43184688	4.59539	4.65401	4.95174	4.92456	4.50972	4.21733	5.7076	7.30086	6.94171
Bend3	chr10:43198945-43235223	5.75344	5.69128	5.93104	5.33362	3.9848	4.15098	13.3501	13.4511	9.19899
1700021F05Rik	chr10:43244926-43260800	31.0052	29.9284	29.6875	24.8181	22.0902	24.4951	34.3835	37.2286	35.8612
Cd24a	chr10:43298974-43304071	145.279	204.985	436.926	323.141	690.404	663.799	302.919	273.444	164.542
F830002L21Rik	chr10:43313232-43350719	0	0	0.120817	0	0.0301825	0	0	0.0309968	0.0302721
1700027J07Rik	chr10:43465963-43485642	0	0	0.0574443	0.0626831	0	0	0	0.0589514	0.0575732
4933404K13Rik	chr10:43545712-43553107	0	0	0	0.0855765	0	0	0	0	0
Qrsl1	chr10:43593995-43621542	5.45433	5.20685	5.90295	7.14011	5.98216	5.51371	6.21496	6.77219	6.89293
Rtn4ip1	chr10:43621612-43667668	7.20094	7.12891	9.08378	7.57424	6.54692	5.9473	8.57324	9.6492	8.71373
Aim1	chr10:43670112-43724652	1.22626	0.742504	1.69092	2.62633	2.09849	2.387	0.469431	0.4828	0.840522
Speer5-ps1	chr10:43890252-43939391	0	0	0	0	0	0	0	0.0658777	0
Atg5	chr10:43988163-44084097	16.9671	16.5443	16.0704	22.1823	21.2288	21.7892	15.0749	18.0426	16.726
Mir1929	chr10:44079481-44079574	0	0	0	0	0	0	0	0	0
Prdm1	chr10:44156979-44178554	0.0788459	0.0216318	0.0491631	0.214587	0.157208	0.182873	0.0327567	0.0605436	0.0197094
Prep	chr10:44787019-44878801	71.7839	70.4569	72.0875	63.258	53.5723	53.4974	101.85	95.0067	91.6882
Popdc3	chr10:45009110-45038256	0	0	0	0	0.0596687	0	0	0	0
Bves	chr10:45055567-45089514	0	0	0	0	0.24516	0.038344	0	0	0
Lin28b	chr10:45096424-45190007	0.108347	1.07161	0.453991	0.154811	0	0	0.189055	2.73718	1.75368
Hace1	chr10:45297634-45432151	3.11457	2.70375	2.93856	3.68604	3.85579	3.2149	3.14122	2.5929	3.37179
D030045P18Rik	chr10:45527509-45571824	0	0	0	0	0	0	0	0	0
C130030K03Rik	chr10:48813486-48815649	0	0	0	0	0	0	0	0	0
Grik2	chr10:48819268-49508560	0	0	0	0	0	0	0	0	0
Ascc3	chr10:50312474-50571008	11.8964	12.5018	11.4802	13.7113	13.1846	13.403	11.4046	13.1344	14.6637
Sim1	chr10:50615456-50708958	0	0	0	0	0	0	0	0	0
Lilr4b	chr10:51200417-51206135	96.5995	61.1075	34.4856	157.187	159.552	164.244	23.6091	30.5257	75.4059
Lilrb4a	chr10:51210703-51216417	175.336	114.499	64.2624	282.517	276.856	276.468	41.1608	49.9382	137.26
Fam162b	chr10:51305255-51310266	0	0	0	0	0	0	0	0	0
Gprc6a	chr10:51334628-51351264	0	0	0	0	0	0	0	0	0
Rfx6	chr10:51397565-51450235	0	0	0	0	0	0	0	0	0
4933411G06Rik	chr10:51475979-51477000	0	0	0	0	0	0	0	0	0
Vgll2	chr10:51742307-51748277	0	0	0	0	0	0	0	0	0
Ros1	chr10:51765731-51915050	0	0	0	0	0	0	0	0	0
Dcbld1	chr10:51953424-52041183	0.29952	0.345134	0.156879	0.0380414	0	0.0190702	0.0387134	0.0715533	0.0174701
Gopc	chr10:52056829-52101930	12.3983	11.9318	10.7527	11.5956	10.1663	10.8278	7.5451	9.2682	12.2022
Nepn	chr10:52111413-52124410	0	0	0	0	0	0	0	0	0
Nus1	chr10:52137352-52159998	33.4728	32.1727	28.847	38.2051	32.1566	34.9819	36.0822	35.4729	37.5274
Zfa-ps	chr10:52262125-52265545	1.45378	1.43803	1.35317	1.79358	1.55082	1.33823	1.7149	1.56128	1.40984
Slc35f1	chr10:52410306-52831428	0	0	0	0	0	0	0.0114501	0	0
Cep85l	chr10:52997886-53099657	11.2795	11.0268	7.45402	3.55989	2.62777	1.99007	4.87429	5.78284	5.62783
Gm19395	chr10:53000075-53003493	0.124071	0	0.108308	0	0	0	0	0	0
Pln	chr10:53057491-53065805	0.0524197	0.0755055	0.0686413	0.0499329	0	0	0.0254055	0.0469602	0.0917284
Gm20597	chr10:53218248-53238795	0	0.0358417	0.0279286	0	0.0046514	0.0356474	0.010338	0	0.0279913
Mcm9	chr10:53257129-53350245	3.53116	3.42026	3.5784	3.14427	2.8794	2.66859	2.30685	2.61324	3.23719
Asf1a	chr10:53316766-53329021	14.0112	16.0793	13.7972	11.2035	11.6757	10.9606	12.7541	12.705	10.4646
Fam184a	chr10:53352951-53470715	0	0	0	0	0	0	0	0	0
Man1a	chr10:53625838-53795602	5.3196	6.17964	8.71368	8.96959	14.7612	20.4677	1.2151	2.17737	1.752
Gm16998	chr10:53795727-53800887	0	0.105438	0	0	0.143675	0.0524332	0	0	0
Tbc1d32	chr10:55734099-55948495	1.13701	1.06874	1.02051	0.976284	0.614655	0.711177	0.450194	0.746007	0.896697
Msl3l2	chr10:55826722-55836686	5.79007	6.70538	5.20682	6.04198	2.38579	3.94584	1.83333	2.73688	2.11286
Gja1	chr10:56097105-56110225	0.0388346	0.316971	9.89898	0	0	0.0185443	17.5994	9.72382	25.5505
4930467K11Rik	chr10:57198188-57206159	0	0	0.0947434	0	0	0	0	0	0
Hsf2	chr10:57206190-57232949	8.82551	7.89326	7.23667	8.3181	6.82519	7.42793	6.16256	5.92454	8.65867
Serinc1	chr10:57235581-57252335	61.1133	54.8793	47.0941	74.4136	65.1855	72.977	28.6815	28.7335	33.722
Pkib	chr10:57351786-57460918	2.43545	1.58822	1.09207	2.42687	1.21795	1.29153	0.55221	0.300771	0.0879395
Fabp7	chr10:57504728-57508256	0.100947	0	0	0	0	0.192817	0.195714	0.0904337	0
Smpdl3a	chr10:57514349-57531636	39.6826	37.696	41.2716	93.7901	127.657	144.204	33.7196	13.3868	6.08662
Dux	chr10:57693398-57695423	0	0	0	0	0	0	0	0	0
Gm4981	chr10:57697595-57699408	0	0	0	0	0	0	0	0	0
Gcc2	chr10:57718273-57768340	10.012	10.4201	10.1277	9.66464	10.4476	9.55331	15.3158	14.8261	13.6355
Lims1	chr10:57786213-57887439	26.3917	23.9708	33.1939	25.4777	27.5112	24.1465	19.749	22.7575	26.9762
Ranbp2	chr10:57909599-57956902	62.7939	59.8015	52.5884	55.0348	53.0485	47.8035	61.6431	58.2459	49.6873
Ccdc138	chr10:57960684-58038992	1.24513	1.29128	1.34779	1.11489	0.825471	0.784835	0.627646	0.713887	1.02401
Edar	chr10:58063535-58138444	0	0	0	0	0	0	0	0	0
BB019430	chr10:58159492-58167025	0	0	0	0	0	0	0	0	0
Sh3rf3	chr10:58276106-58601664	0	0	0	0	0	0	0	0	0
2018-09-10	chr10:58604374-58684595	6.58228	5.71849	2.52359	3.94776	2.24841	2.12901	3.98379	3.36965	4.11362
Sowahc	chr10:58684669-58689181	7.76691	5.29853	2.02034	7.32371	6.47865	7.13048	2.7759	3.0573	3.48918
P4ha1	chr10:58786043-58836052	36.6092	33.9138	24.2342	24.3059	15.2186	17.2363	20.2547	19.2046	19.911
Pla2g12b	chr10:58866432-58884724	0	0	0	0	0	0	0	0	0
Oit3	chr10:58885707-58904527	0.69515	0.538317	0.724281	1.0253	0.802002	0.663895	0.086951	0.16071	0.0784763
Mcu	chr10:58909731-59079440	12.3934	17.7395	30.6316	13.9372	22.6164	17.9659	35.4484	41.0815	39.3453
Micu1	chr10:59165310-59326882	24.6082	27.8235	30.4762	34.0776	37.9137	33.1672	22.6634	23.4978	27.4558
Dnajb12	chr10:59342338-59360764	27.2678	28.6987	30.5372	28.9817	29.6075	29.4683	27.2677	28.8956	27.8119
Ddit4	chr10:59412422-59414518	18.7131	20.2335	18.1949	4.52879	5.73985	5.26706	14.4901	10.3583	15.0078
Anapc16	chr10:59450656-59465860	22.4316	25.5304	21.024	29.1894	26.7742	30.1739	26.5986	23.9978	21.6844
Ascc1	chr10:59465552-59562738	15.2455	18.0576	19.0023	17.0518	15.5767	18.2229	19.9557	20.1224	21.2069
Spock2	chr10:59569004-59596661	0.184182	0.22063	0.192373	0.179506	0.192606	0.187687	0.146471	0.188809	0.186168
Mir6906	chr10:59589523-59589581	0	0	0	0	0	0	0	0	0
Chst3	chr10:59644275-59682008	0.0290191	0.0292465	0.0432802	0.0248246	0.0389518	0.0284231	0.0232606	0.049161	0.0594289
Psap	chr10:59740375-59765348	898.867	524.358	307.929	1796.43	1171.23	1414.46	172.964	238.516	430.278
Cdh23	chr10:59765497-60159238	0.150051	0.253394	0.0858178	1.2322	1.0291	1.29471	0.0601873	0.0695278	0.117699
4632428N05Rik	chr10:59809598-59835432	40.2312	43.3534	33.1701	54.3488	79.1992	71.1298	15.8942	11.2741	28.4028
Gm17455	chr10:59862473-59866306	0	0	0	0	0.0752474	0.164766	0	0.0772775	0
Slc29a3	chr10:60174819-60215530	14.7424	9.78479	5.61121	24.023	17.7793	17.1668	4.81791	5.79684	6.96777
Unc5b	chr10:60225342-60294329	0.0205157	0.00955152	0.0694656	0.00947509	0.0520616	0.037999	0.0626761	0.0891101	0.00870268
Mir6408	chr10:60385770-60385861	0	0	0	0	0	0	0	0	0
Pldi	chr10:60390973-60400880	0	0	0	0	0	0	0	0	0
Mir466j	chr10:60423470-60423592	0	0	0	0	0	0	0	0	0
Gm20611	chr10:60494050-60500828	0	0	0	0	0	0	0	0	0
Pcbd1	chr10:60552078-60557077	0.546881	1.1378	0.397832	0.0868227	0.0795089	0.261146	0.26507	0	0.0797449
Sgpl1	chr10:60561389-60610413	30.4862	22.6906	12.9739	59.6954	39.1695	41.0444	13.5015	15.3488	18.9638
Tbata	chr10:60634711-60651589	0	0.0442581	0	0	0.0402055	0	0.344904	0.0825855	0.0693077
Adamts14	chr10:60659859-60736186	0.0130272	0.000542639	0	0.0349893	0.0902101	0.0215879	0	0.0405	0
Prf1	chr10:60760583-60767011	0	0	0	0	0	0	0	0	0
Pald1	chr10:60782404-60846271	1.28714	0.637919	0.314127	2.9004	0.917553	0.978127	3.8103	0.471154	0.435921
Nodal	chr10:60880719-60888085	0	0.143095	0.104069	0	0	0	0	0	0.0260757
Eif4ebp2	chr10:60895244-60915417	137.014	137.926	122.403	107.586	96.1001	87.8703	103.653	115.152	127.288
Lrrc20	chr10:60938580-61044976	11.7732	12.6271	12.0149	12.7028	12.3004	10.0877	6.51171	5.62511	9.34585
Npffr1	chr10:61058231-61089133	0	0	0	0	0	0	0	0	0
Ppa1	chr10:61111368-61136913	64.8718	70.1974	80.99	72.6933	58.2146	68.6796	149.611	136.175	112.381
1700022H01Rik	chr10:61137274-61143038	0	0.112685	0	0.111784	0	0	0.227517	0	0.102671
Sar1a	chr10:61143068-61156045	49.6114	50.2555	43.8003	62.2272	53.8297	61.1777	38.4832	41.2247	40.4253
Tysnd1	chr10:61158261-61165521	42.5221	42.8662	43.4538	46.1801	34.7212	40.672	52.7185	57.1534	50.2009
Aifm2	chr10:61178010-61202008	11.0417	7.50466	9.36843	11.6387	10.1597	9.54264	14.2297	12.1449	16.4823
H2afy2	chr10:61201394-61246612	1.23819	1.53773	0.807055	0.691945	0.604854	1.04062	1.53637	1.16839	1.11219
Mir5108	chr10:61237484-61237569	0	0	0	0	0	0	0	0	0
Col13a1	chr10:61300981-61441856	0	0	0	0	0	0	0	0	0
Gm5424	chr10:61533769-61535319	9.08133	7.8362	30.2488	17.0618	15.5698	18.0654	7.82969	0.974762	2.61793
2010107G23Rik	chr10:61570403-61573761	0.036889	0	0.0644042	0.0702778	0.128715	0.0704607	0	0.132188	0.0968231
Neurog3	chr10:61595837-61597511	0	0	0	0	0	0	0	0	0
Tspan15	chr10:61648143-61693966	0.144304	0.205605	0.200676	0.122091	0.164064	0.149919	0.200935	0.208972	0.129282
Mir7662	chr10:61656914-61656975	0	0	0	0	0	0	0	0	0
Tacr2	chr10:61715185-61728738	0.0548486	0	0.09576	0	0	0	0.0265848	0.0491362	0.0239937
Hk1	chr10:61731602-61842656	111.752	118.989	104.225	115.4	113.38	110.422	62.664	71.5152	82.3062
Hk1os	chr10:61803354-61812614	2.5531	1.53225	2.50732	1.67199	2.36631	3.20028	0.773421	1.1436	0.837647
Hkdc1	chr10:61845884-61885205	0	0	0.0449889	0	0	0	0	0	0
Supv3l1	chr10:61892125-61912441	22.7534	23.6551	23.3267	19.9312	17.0609	18.6788	36.495	35.6888	31.8108
4930507D05Rik	chr10:61911907-61914101	0.311369	0.326171	0.321229	0.566232	0.271613	0.351436	0.631115	0.532523	0.445777
Vps26a	chr10:61917590-61949553	58.5215	55.1042	44.7895	59.788	55.7075	54.0633	48.4243	50.5522	56.0472
Srgn	chr10:61957175-61970503	1136.63	1515.17	1155.61	1277.82	1664.69	1501.82	874.64	920.421	577.559
Kif1bp	chr10:62021217-62041205	12.7661	11.9008	9.95163	12.3024	12.2843	12.6427	11.4844	9.54523	9.66975
Ddx21	chr10:62042994-62065046	102.781	103.044	115.603	89.4763	73.9064	71.4093	192.977	176.671	133.594
Ddx50	chr10:62078770-62113946	31.6258	34.7135	36.5326	34.9949	38.0851	37.7956	29.7566	33.2402	31.5643
Stox1	chr10:62122169-62188847	0.0388748	0.0559939	0.271486	0.129607	0.288245	0.241325	0.169582	0.156717	0.0680237
Mir7215	chr10:62145255-62145306	0	0	0	0	0	0	0	0	0
Ccar1	chr10:62206675-62255116	47.473	47.1043	43.685	40.8771	37.8015	35.6024	55.3591	51.5257	46.9771
Tet1	chr10:62267317-62342762	0.0724057	0.208658	2.45562	0.0622872	0.127753	0.0839182	1.44404	1.33158	0.394361
Slc25a16	chr10:62383380-62409242	10.1459	10.1845	12.0714	10.1578	9.25194	9.79958	9.24032	9.99981	10.3869
Dna2	chr10:62409776-62436936	25.3326	24.6982	31.6775	22.6517	19.3013	16.9437	31.665	32.2124	22.8051
Rufy2	chr10:62442970-62481490	1.04398	0.881683	0.87286	1.80046	1.56626	1.72506	0.956783	0.976668	0.953834
Hnrnph3	chr10:62477411-62486597	13.1359	14.1835	20.6556	11.256	12.2092	13.367	15.5141	16.7524	7.65343
Pbld2	chr10:62487259-62521560	0.112266	0.121278	0.0857522	0.147043	0.0489658	0.0536092	0.0816221	0.100574	0.0491112
Pbld1	chr10:62524364-62540284	0.0943816	0.110419	0.0884926	0.169704	0.11881	0.0426147	0.350556	0.0975175	0.0692123
Atoh7	chr10:62562903-62563353	0	0	0	0	0	0	0	0	0
Mypn	chr10:62578542-62666700	0	0	0	0	0	0	0	0	0
Herc4	chr10:62706544-62780629	15.3814	14.3768	16.3824	16.4468	15.1984	14.877	20.559	17.4206	15.3469
Sirt1	chr10:62781752-62801783	10.8309	10.7417	17.5036	12.735	11.3061	11.448	14.3307	12.4862	10.0616
Dnajc12	chr10:62845190-62871588	9.11908	8.02927	9.04763	8.05637	6.4713	7.31159	8.13048	5.41047	6.79227
Ctnna3	chr10:62892845-64466415	0.0165353	0	0	0	0	0	0	0	0
Lrrtm3	chr10:63391244-63553003	0	0	0	0	0	0	0	0	0
1700023F02Rik	chr10:65583356-65586812	0	0	0	0	0	0	0	0	0
4930407I19Rik	chr10:65608043-65642262	0	0	0	0	0	0	0	0	0
Gm31763	chr10:66467822-66504074	0.0686103	0.26353	0.119786	0.326777	0.299249	0.131051	0.0665099	0.0614645	0
Reep3	chr10:66471936-66559736	21.4225	18.7101	15.3235	26.7072	28.5947	26.3558	11.4809	11.665	14.6763
Jmjd1c	chr10:66590005-66719074	20.1108	18.7426	19.5531	17.1148	15.7182	13.1057	16.0997	14.6121	14.836
Nrbf2	chr10:66729436-66748029	21.6788	21.2265	21.7166	22.0384	19.5309	21.2132	18.0868	19.8667	18.7493
Egr2	chr10:67000616-67004936	0.673263	0.391816	0.427435	2.58472	3.13226	3.31238	0.257105	0.365541	0.285596
Ado	chr10:67007258-67011703	8.73968	8.16264	8.77715	10.5518	9.40805	10.1353	6.51504	7.75805	9.1106
Zfp365	chr10:67348852-67375410	0.097288	0.0800743	0.0121325	0.0264779	0.0121237	0	1.40117	0.747047	0.194555
Rtkn2	chr10:67442345-67506612	2.01465	1.84508	1.33814	1.30017	1.15111	0.995105	4.77113	6.26704	6.54304
Arid5b	chr10:67558340-67741474	9.46707	6.95986	4.8829	8.74278	6.81509	6.69641	4.09858	4.25819	5.88182
4930545H06Rik	chr10:67781812-67783890	0	0	0	0	0	0	0	0	0
1700040L02Rik	chr10:67893703-68004623	1.25297	1.51702	0.332889	0.41514	0.0950424	0.20811	0.0528093	0.244016	1.42987
Tmem26	chr10:68186493-68245402	0	0	0.0304288	0	0	0	0	0	0
Rhobtb1	chr10:68671299-68754532	1.68945	1.49534	0.810302	1.50445	1.91704	2.05943	1.43212	1.37811	1.76652
Cdk1	chr10:68799382-68815660	39.8295	45.7404	45.396	48.0613	45.4002	50.0092	44.634	43.2621	47.7802
Ank3	chr10:68996455-69490184	0.0432536	0.0670602	0.0463575	0.022108	0.0709134	0.209296	0.0507783	0.0166068	0.0456993
Ccdc6	chr10:69559868-69655948	16.7705	16.5828	16.391	16.986	16.9347	15.9962	20.6404	23.268	22.5475
Mrln	chr10:69667411-69682459	0	0	0	0	0	0	0	0	0
Slc16a9	chr10:69708023-69748699	0	0	0.0292783	0	0	0	0.0162564	0	0
Fam13c	chr10:69903415-70021480	0	0	0	0	0	0	0	0	0
Phyhipl	chr10:70020433-70062039	0	0	0	0	0.0195035	0	0	0	0
D630013N20Rik	chr10:70063796-70118711	0	0	0	0	0	0	0	0	0
Bicc1	chr10:70387847-70622382	0	0	0.356941	0	0	0	0	0	0
C730027H18Rik	chr10:70631484-70644788	0	0	0	0	0	0	0	0	0
1700113B09Rik	chr10:70664492-70667236	0	0	0	0	0	0	0	0	0
Tfam	chr10:70688224-70700792	9.63854	10.7773	12.6308	9.14516	7.97788	8.70543	12.3796	11.8209	11.518
Ube2d1	chr10:70717727-70748010	24.8363	23.9811	19.8774	21.8651	17.3401	18.3706	20.0708	20.3167	23.2156
Cisd1	chr10:70793241-70807597	8.95638	8.10276	5.81537	9.23656	6.71513	7.84676	7.82116	6.8963	13.2759
Ipmk	chr10:70810540-70848633	15.1819	14.0595	12.4512	16.8188	15.3643	15.3455	14.5915	12.5165	16.7807
1700049L16Rik	chr10:71442632-71443438	0	0	0.0816811	0	0	0	0	0	0
Zwint	chr10:72117593-72137712	72.8838	75.2708	79.7417	64.8234	59.2227	61.3919	51.6938	54.0551	63.5575
A330049N07Rik	chr10:72436050-72549453	0.0946714	0.0757563	0.0275477	0.0901802	0.165167	0.120553	0	0.0141352	0.0552191
Pcdh15	chr10:73284614-74112477	0	0	0	0	0	0	0	0	0
Rsph14	chr10:74420221-74495331	0	0	0	0	0.0491891	0	0	0	0
Gnaz	chr10:74429975-74478622	0	0.0242448	0	0	0	0.0241133	0	0	0.0220901
Rab36	chr10:74499833-74516845	0.256468	0.179106	0.183177	0.155464	0.427104	0.178135	0.180812	0.0835479	0
Bcr	chr10:74523640-74647668	11.0116	10.4542	8.23043	17.6147	22.3613	20.4383	16.8826	16.8051	9.63409
Specc1l	chr10:74674817-74775145	9.77934	9.0212	8.76349	10.2955	9.37788	9.26617	8.03514	8.48517	9.01031
Adora2a	chr10:74779621-74797537	0.0938827	0.0901502	0.266353	0.581287	0.982746	1.56908	0	0	0.0205346
Gm5779	chr10:74814799-74815706	3.52556	4.77033	4.47655	3.81626	4.43837	4.32359	5.86435	5.99374	4.24124
Upb1	chr10:74869655-74904424	0.00992418	0	0.0346532	0.00945337	0.0346281	0	0.0384815	0	0.0347309
4933407G14Rik	chr10:74912254-74925849	0.0532412	0	0	0	0	0	0	0	0
Gucd1	chr10:74969558-74980067	9.40909	9.01502	7.0143	13.3648	11.9847	11.1729	4.11658	4.00944	6.15584
Snrpd3	chr10:74980786-74998185	341.63	348.466	366.45	301.009	247.645	252.839	377.448	392.969	341.153
Lrrc75b	chr10:75012869-75023075	0.0991323	0.0447105	0.0462243	0.0329486	0.0884704	0.0541396	0.0552635	0.0181714	0.0379217
Ggt1	chr10:75031406-75048936	0.351684	0.225024	0.0511419	0.167418	0.30678	0.111902	0.113584	0.0787255	0.230655
Ggt5	chr10:75052125-75079713	0.143223	0.123776	0.137529	0.559358	0.387302	0.341959	0.0694194	0.038492	0.18796
Susd2	chr10:75099363-75106753	0.0209311	0.140701	0.0644686	0.0703481	0.129059	0.0399815	0.0202903	0	0.0366269
Cabin1	chr10:75108854-75227102	15.7283	13.9326	14.699	17.0453	18.0541	16.8079	18.0463	18.6663	14.2566
Ddt	chr10:75233977-75236119	55.0764	56.8933	58.763	45.9718	41.25	49.2793	24.9425	33.3919	36.0183
Gstt3	chr10:75236866-75244159	5.77132	5.2502	7.7486	6.46201	8.06686	9.25085	2.6501	3.14448	1.68312
Gstt1	chr10:75246557-75261329	1.42006	0.649334	0.413213	0.966208	0.412914	0.968721	0	0	0.236651
Gstt4	chr10:75277688-75285288	0.0742147	0.142528	0	0	0	0.0708778	0	0	0
Gstt2	chr10:75294589-75297626	15.0244	18.6021	14.465	3.17524	14.7917	12.7801	3.84014	5.75603	10.1862
Mif	chr10:75322097-75322995	1173.87	1137.48	1007.03	733.395	452.68	559.393	1234.74	1392.59	1140.38
Derl3	chr10:75356142-75358686	0.59713	0.57339	0.695018	9.95403	12.8485	26.8508	0.627088	0.312048	1.0884
Smarcb1	chr10:75359513-75384359	42.3838	40.8365	35.8843	41.1717	37.9099	41.0539	41.6347	45.0932	45.5975
Mmp11	chr10:75385966-75395247	0.104571	0.0259549	0.0235954	0.0664064	0.047157	0.103257	0.0786091	0.0726459	0.165538
Chchd10	chr10:75398317-75400479	46.6379	38.8223	21.0172	39.1607	29.5216	36.7318	24.2932	35.4728	123.604
Gm867	chr10:75400467-75403417	0	0.052822	0.04802	0	0	0	0.053325	0.197119	0.385022
Vpreb3	chr10:75411056-75412391	0.566111	0.407703	0.370639	0.134814	0.123457	0	0.274391	0.126788	0
Gm5134	chr10:75417258-75472334	0.149813	0.0616529	0.0186827	0.0203865	0.0186692	0.0204396	0	0	0
Mir6409	chr10:75471670-75471762	0	0	0	0	0	0	0	0	0
Zfp280b	chr10:75495356-75505714	7.86445	7.6097	7.74974	5.89427	4.85061	4.82676	7.99787	8.62302	9.1918
Slc5a4b	chr10:75521365-75573763	0	0	0	0	0	0	0	0	0
Slc5a4a	chr10:75610195-75652010	0	0	0	0	0	0	0	0	0
Prmt2	chr10:75669970-75700610	3.32968	2.8476	2.3486	3.81808	3.01109	3.38119	2.04614	0.931216	2.00615
Mir678	chr10:75670070-75670154	0	0	0	0	0	37.719	0	0	0
S100b	chr10:75716580-75724064	0.0386612	0.0371242	0.0337492	0	0.0337248	0.0369229	0	0	0
Dip2a	chr10:75725793-75808036	2.89387	2.23361	1.62284	4.63211	3.09156	3.67335	1.86427	2.20689	4.23046
Pcnt	chr10:75813998-75905657	15.0975	13.8781	15.4116	14.5957	14.6488	14.1464	14.878	15.9019	15.319
1700094J05Rik	chr10:75851759-75864252	7.52947	5.79774	6.88288	5.88668	8.11717	6.24118	7.84984	8.9725	8.20341
2610028H24Rik	chr10:75911825-75923963	0	0	0	0	0	0	0	0	0
Mcm3ap	chr10:75931715-75978602	39.4281	43.1129	42.9259	52.6241	57.3522	56.7398	58.2994	52.7825	41.0761
Ybey	chr10:75922311-75931859	1.8098	1.83375	2.00886	1.68811	1.48992	1.38523	1.55463	1.8378	1.56555
Lss	chr10:75994349-76019884	18.3198	23.5083	20.8413	13.5261	11.087	8.2035	12.7398	15.6703	25.6193
4930483K19Rik	chr10:76008615-76024971	1.79948	1.62322	1.66606	1.0908	0.761075	0.781169	0.951488	1.31896	2.62396
Spatc1l	chr10:76025016-76032945	0.0499816	0.0479945	0.0872626	0.0476104	0	0	0	0	0.0874584
Ftcd	chr10:76038392-76053083	0	0.0107921	0	0.0642346	0.0196079	0.0644017	0	0	0
Col6a2	chr10:76058500-76086149	0	0	0	0	0	0	0	0	0
Col6a1	chr10:76171536-76188789	0	0	0	0	0	0	0	0	0
Pcbp3	chr10:76224598-76424692	0	0	0	0	0	0	0	0	0
Gm10787	chr10:76474739-76484959	0	0	0	0	0	0	0	0	0
Slc19a1	chr10:76495483-76513177	36.7162	31.0117	27.84	29.6554	24.7928	21.4799	56.24	59.9516	49.0388
Col18a1	chr10:76514923-76629275	0.0116374	0.0558775	0.0203186	0.0332579	0.020304	0.0111142	0.0676917	0.125114	0.0407292
Gm10941	chr10:76720517-76721968	0.249978	0.32826	0.179739	0.268906	0.516884	0.0162776	0.448752	0.292977	0.163466
Pofut2	chr10:76722044-76732331	15.0958	13.6634	13.2754	18.2941	16.7286	17.2203	8.86148	9.39135	11.0061
Adarb1	chr10:76753471-76881018	0.26029	0.205043	0.214101	0.203698	0.24158	0.210928	0.266165	0.387872	0.758938
Gm17769	chr10:76881120-76883684	0	0	0	0.0227361	0	0.0227953	0	0	0
Fam207a	chr10:76949399-76978558	28.798	27.4342	30.0476	20.1456	16.4601	17.9484	34.0055	33.9445	33.306
Itgb2	chr10:76993092-77028419	152.946	166.829	174.88	181.24	263.267	225.651	95.8571	89.0031	135.353
Pttg1ip	chr10:77044511-77061477	32.5074	33.5713	36.8495	41.891	42.1382	42	22.5584	20.3778	27.669
Sumo3	chr10:77068841-77081076	72.0516	74.4763	68.6457	77.4852	71.5417	78.4069	81.2549	79.9456	79.7996
Ube2g2	chr10:77085065-77108735	66.3091	67.9015	60.0139	63.8575	63.2593	61.4518	47.2343	52.0238	53.912
Mir1930	chr10:77103968-77104052	0	0	0	0	0	0	0	0	0
Tspear	chr10:77149313-77349514	0	0.0723775	0.328988	0.0239328	0	0.0719851	0	0	0
Gm19402	chr10:77152701-77153502	0	0	0	0	0	0	0	0	0
Gm10272	chr10:77169331-77169731	0	0	0	0	0	0	0	0	0
Gm10024	chr10:77174190-77174754	0	0	0	0	0	0	0	0	0
Gm10142	chr10:77178551-77178914	0	0	0	0	0	0	0	0	0
Krtap12-1	chr10:77183330-77184001	0	0	0	0	0	0	0	0	0
Gm10100	chr10:77189230-77189593	0	0	0	0	0	0	0	0	0
Gm3238	chr10:77233377-77234070	0	0	0	0	0	0	0	0	0
Gm19668	chr10:77261131-77261878	0	0	0	0	0	0	0	0	0
Gm2696	chr10:77277426-77278149	0	0	0	0	0	0	0	0	0
Krtap10-4	chr10:77288913-77289815	0	0	0	0	0	0	0	0	0
Krtap10-10	chr10:77298691-77299996	0	0	0	0	0	0	0	0	0
Gm10318	chr10:77315603-77316533	0	0	0	0	0	0	0	0	0
Gm3285	chr10:77324719-77325383	0	0	0	0	0	0	0	0	0
1700009J07Rik	chr10:77356164-77358856	0	0	0	0	0	0	0	0	0
Lrrc3	chr10:77360319-77365281	0.17647	0.135275	0.115309	0.101988	0.0837855	0.0845782	0.136595	0.138599	0.0733553
Trpm2	chr10:77370466-77432617	0.50865	0.379718	0.452101	0.28495	0.228759	0.346994	0.0256797	0	0.0784703
1810043G02Rik	chr10:77441394-77448183	4.34174	3.8791	3.13097	3.66825	3.52391	4.2547	0.365985	0.405867	1.42035
Pfkl	chr10:77449693-77472541	74.513	78.6025	67.6215	42.1408	27.1185	27.1971	42.6388	45.4354	59.6786
Aire	chr10:77492766-77506355	0	0.0372246	0	0	0.0338161	0	0	0	0.0339164
Dnmt3l	chr10:77505031-77526367	5.75335	8.60611	7.29446	10.718	9.029	10.3287	6.18544	7.70959	8.51896
Icosl	chr10:77532112-77542270	3.80845	3.86965	5.93398	6.53843	8.92352	7.92997	1.5669	1.44803	2.65401
D10Jhu81e	chr10:77624811-77632513	29.3554	30.5684	25.0317	33.009	29.1261	30.0778	15.8774	20.8556	24.1524
Pwp2	chr10:77633654-77647894	14.8236	15.1045	15.5283	12.3498	10.7199	11.2963	19.0754	20.2568	14.8374
Trappc10	chr10:77649470-77707387	23.8323	23.5772	23.2513	34.0691	37.9564	35.7129	19.4608	21.0897	23.9649
Agpat3	chr10:77734307-77814445	4.68398	3.84567	2.03684	2.28894	3.1138	4.57316	0.253193	0.935944	7.14492
Mir7659	chr10:77802894-77802952	0	0	0	0	0	0	0	0	0
Rrp1	chr10:77863106-77875788	153.688	159.542	155.886	135.779	137.769	133.061	172.714	164.452	159.46
Mir6907	chr10:77871219-77871290	0	0	0	0	0	0	0	0	0
Cstb	chr10:77888414-77890367	232.672	193.387	152.58	443.941	423.952	477.941	116.479	97.7534	118.128
Mir6410	chr10:77897543-77897647	0	0	0	0	0	0	0	0	0
Pdxk	chr10:77899491-77927693	22.0204	21.5034	14.3504	26.313	22.9843	22.784	20.5245	22.4187	23.2629
Mir6908	chr10:77907839-77907902	0	0	0	0	0	0	0	0	0
Ilvbl	chr10:78037244-78047247	5.35462	5.2181	5.16025	6.66612	5.73461	6.4303	3.34055	4.17951	3.13093
Syde1	chr10:78047247-78054709	0	0	0	0	0	0	0	0	0.0159803
Olfr1357	chr10:78074413-78080819	0	0	0	0	0	0	0	0	0
Casp14	chr10:78174739-78181038	0	0	0	0	0	0	0	0	0
Ccdc105	chr10:78209668-78215812	0	0	0	0	0	0	0	0	0
Slc1a6	chr10:78243240-78277570	0	0	0	0	0	0	0	0	0
Olfr1356	chr10:78309695-78310658	0	0	0	0	0	0	0	0	0
Olfr1355	chr10:78338293-78342851	0	0	0	0	0	0	0	0	0
Olfr1354	chr10:78379586-78380681	0	0	0	0	0	0	0	0	0
Olfr8	chr10:78417951-78418884	0	0	0	0	0	0	0	0	0
Olfr1353	chr10:78426053-78433357	0	0	0	0	0	0	0	0	0
Olfr1352	chr10:78443794-78447466	0	0	0	0	0	0	0	0	0
Olfr1351	chr10:78480068-78481028	0	0	0	0	0	0	0	0	0
Olfr57	chr10:78497467-78498547	0	0	0	0	0	0	0	0	0
2610008E11Rik	chr10:78527118-78560345	1.69339	1.84108	1.1606	1.47974	1.31847	1.14945	0.230631	0.501496	0.636703
Vmn2r80	chr10:78611560-78657678	0	0	0	0	0	0	0	0	0
Vmn2r81	chr10:78710521-78757280	0	0	0	0	0	0	0	0	0
Vmn2r82	chr10:78819335-78859511	0	0	0	0	0	0	0	0	0
Vmn2r83	chr10:78931702-78954899	0	0	0	0	0	0	0	0	0
Ppap2c	chr10:78989168-78996532	10.3623	9.02613	8.68495	9.26974	5.06177	7.39238	2.21387	2.44057	0.207544
Mir6909	chr10:78993773-78993835	0	0	0	0	0	0	0	0	0
Mier2	chr10:79002989-79017836	7.69217	6.37703	6.79827	5.18824	2.79236	3.76441	0.138945	0.428014	0
Theg	chr10:79039221-79049881	0	0	0	0	0	0	0	0	0
C2cd4c	chr10:79069598-79076770	0	0	0	0	0	0	0	0	0
Shc2	chr10:79080682-79100663	0	0.00720626	0.0131023	0.035743	0.015275	0	0.0145498	0	0.0109431
Odf3l2	chr10:79102270-79108483	0	0	0	0	0	0	0	0	0
Madcam1	chr10:79127318-79131281	0	0	0	0	0	0	0	0	0.0405287
Tpgs1	chr10:79132154-79138871	12.685	12.241	10.4704	14.2367	13.0922	16.6127	11.3227	11.8702	10.4389
Cdc34	chr10:79144939-79151143	113.374	124.834	125.084	107.541	99.5463	104.098	201.246	209.12	188.801
Gzmm	chr10:79151764-79158006	0.122053	0.300214	0.330733	0.232529	0.227223	0.116565	0	0.48917	0.621836
Bsg	chr10:79167102-79174724	262.541	270.946	339.864	239.224	191.184	220.209	219.92	225.821	216.393
Hcn2	chr10:79179378-79198853	0.150664	0.198927	0.164403	0.107638	0.082142	0.0719451	0.0912826	0.151844	0.131817
Polrmt	chr10:79198869-79209326	10.544	10.7025	12.7147	9.8025	8.79722	9.51048	11.9862	12.5377	12.7571
Fgf22	chr10:79217863-79219706	0	0	0	0	0	0	0	0	0
Rnf126	chr10:79221259-79229697	62.4426	64.0496	68.1563	51.9987	46.1524	49.3909	87.2907	88.8983	81.9531
Fstl3	chr10:79240018-79245375	0.354274	0.340189	0.421721	0.0920363	0.309039	0.369103	0.967843	0.750162	0.760802
Prss57	chr10:79244218-79251730	6.60838	13.4736	25.2581	20.5446	37.2231	30.5188	31.5916	43.7927	26.6315
Palm	chr10:79256316-79283641	26.79	37.0042	53.4215	33.3509	45.8383	41.3899	54.4263	63.3394	54.1466
Misp	chr10:79283765-79293197	0	0	0	0	0	0.0242001	0	0	0
E130317F20Rik	chr10:79314121-79317716	0.498346	0.685897	0.638044	0.569645	0.521659	0.523533	0.563605	0.535732	0.523207
Lppr3	chr10:79323219-79337379	53.7975	56.8488	43.5913	51.5861	54.7349	62.2953	58.0098	59.3916	46.7388
Ptbp1	chr10:79317176-79327180	311.941	312.695	303.769	247.974	228.188	226.432	333.646	338.42	340.011
Mir6910	chr10:79325331-79325397	0	0	0	0	265.062	0	0	0	531.697
Prtn3	chr10:79342411-79345917	1137.94	1542.61	689.374	1039.02	1339.87	1147.91	842.664	1085.5	978.51
Elane	chr10:79349056-79350961	1682.47	2278.63	1011.46	2196.92	3404.12	2259.67	2348.22	3032.11	2268.99
Cfd	chr10:79353597-79355405	0.234445	0.600795	0.0681539	0.223323	0.545783	0.448098	0.682359	0.280139	0.205117
Med16	chr10:79357451-79371683	17.6575	17.8709	19.8689	15.91	17.125	17.5858	13.7235	16.391	15.9663
R3hdm4	chr10:79372797-79379675	48.7004	54.575	75.5481	51.9648	73.6525	71.7401	75.9473	80.1101	94.9696
Kiss1r	chr10:79379715-79385017	0.228518	0.164575	0.31585	0.181397	0.132893	0.345552	0.092301	0.204718	0.199932
Arid3a	chr10:79389787-79417763	34.7918	35.9634	31.3912	37.9903	41.62	38.2049	33.6826	35.3416	37.14
Wdr18	chr10:79422896-79431991	27.4069	26.632	28.413	21.1507	17.1177	17.7432	32.5646	36.7187	26.6488
Grin3b	chr10:79433468-79439935	0.146787	0.140952	0.256275	0.104868	0.160056	0.175234	0.320161	0.197249	0.481595
Tmem259	chr10:79439864-79447075	61.2678	57.3853	64.6625	53.737	51.2789	53.3172	65.2341	61.3352	63.5139
Cnn2	chr10:79451344-79458145	52.9026	77.0216	101.617	47.8766	115.961	89.1839	72.4261	81.1306	98.6284
Abca7	chr10:79460359-79478317	26.2961	25.9447	30.3349	26.6524	30.6821	27.3026	16.7662	18.0609	21.7571
Hmha1	chr10:79479416-79494216	90.8874	88.2003	85.1099	95.3653	117.336	111.308	73.2422	74.2462	71.2193
Polr2e	chr10:79498697-79502404	111.677	110.399	131.432	94.7668	74.7441	93.9428	143.235	130.675	115.912
Gpx4	chr10:79509910-79519184	274.772	288.198	266.772	254.601	270.068	283.755	234.943	237.033	264.171
Sbno2	chr10:79519758-79565447	21.5617	18.3878	21.2499	25.4377	29.1435	28.851	19.9415	18.7246	19.7866
Stk11	chr10:79578547-79593430	52.2616	57.4009	65.9158	56.3896	63.4984	61.8622	54.0921	54.9857	49.3041
Dos	chr10:79593178-79602112	3.69768	3.74678	4.25716	3.38875	3.35433	3.78962	3.48065	3.24201	2.44471
Atp5d	chr10:79605059-79608563	233.374	234.66	250.257	204.589	191.478	215.333	225.178	245.995	289.933
Midn	chr10:79611016-79621113	39.8394	40.2977	41.1033	37.4143	40.842	36.6273	35.096	36.356	40.9046
Cirbp	chr10:79630585-79634398	11.1909	12.6484	15.5183	14.1283	16.8616	15.648	6.74775	9.25787	10.8684
1600002K03Rik	chr10:79635688-79637864	20.7923	18.1506	15.7305	23.407	16.7085	23.5882	13.0707	12.4179	7.05603
Efna2	chr10:79642226-79652755	0.0584634	0.0561391	0.0510355	0.139225	0.076498	0.0558348	0.0850106	0.0523745	0.05115
Mum1	chr10:79689342-79707889	12.9728	12.3023	11.5385	11.0125	10.4513	10.3712	10.7874	11.8245	14.2252
Ndufs7	chr10:79712196-79719537	54.0917	56.7252	53.4323	63.8258	53.0389	63.0208	68.896	67.313	74.8129
Gamt	chr10:79720895-79723713	6.77469	4.38563	2.39216	5.94574	4.58166	5.37962	2.28749	3.06865	2.53072
Dazap1	chr10:79727735-79751158	85.2974	88.9107	90.7696	63.0855	60.2233	53.7247	91.854	99.5524	92.6775
Mir6911	chr10:79740908-79740977	0	0	0	0	0	0	0	0	0
Rps15	chr10:79755175-79756859	1567.79	1674.01	2035.19	1466.75	1197.02	1374.9	1844.32	2023.52	1848.52
Apc2	chr10:79764564-79781001	0.0127012	0.0548831	0.0388062	0.0120986	0.0720166	0.0485205	0.0615619	0.0625811	0.0833427
2310011J03Rik	chr10:79780999-79783293	23.6545	25.5765	25.1101	23.3067	22.6267	24.0329	20.5285	21.2949	18.7987
Pcsk4	chr10:79784027-79792218	0.999789	1.00687	1.59652	1.2311	0.659418	0.861681	4.49134	3.25497	3.32821
Reep6	chr10:79792889-79799186	1.82232	2.31234	4.26106	1.56848	5.73663	2.54842	34.7979	32.2321	41.0125
Adamtsl5	chr10:79802537-79811193	1.19102	0.516151	0.173125	1.2296	1.84889	2.79267	0.34697	0.452178	0.24344
Plk5	chr10:79819203-79828234	0.0295228	0	0.0515437	0	0	0	0.143095	0	0
Mex3d	chr10:79843099-79850396	6.51093	5.29566	5.7642	6.06149	4.50506	5.16126	6.54405	6.9399	5.05096
Mbd3	chr10:79855283-79862276	79.5075	77.6385	85.4475	82.1482	71.5616	85.9685	103.854	102.463	94.9777
Uqcr11	chr10:79865741-79869566	260.268	277.197	303.499	239.133	219.624	245.551	281.72	333.212	300.357
Tcf3	chr10:79871909-79896398	28.7474	26.8392	31.3663	21.9066	21.7238	22.3294	29.1746	32.6341	29.114
Onecut3	chr10:79957650-79980005	0.0104663	0	0.0219277	0	0	0.00399829	0	0	0.0164827
Atp8b3	chr10:79982329-80001869	0.107116	0.0514288	0.0467534	0.0255086	0.0233598	0	0	0.011995	0
Rexo1	chr10:80003670-80024305	25.4721	25.2511	23.4867	24.3595	23.9762	25.1817	29.9473	31.0764	32.7367
Klf16	chr10:80029865-80040041	11.3902	9.76627	15.4067	9.24975	6.80455	6.65868	13.2275	14.7596	15.099
Abhd17a	chr10:80046393-80053086	28.6751	29.7942	31.6192	29.5135	31.3641	33.5752	26.8937	30.1822	30.8358
Adat3	chr10:80065624-80070399	3.83207	3.22657	4.4406	3.91203	4.31526	4.50162	5.79075	4.26445	3.3073
Scamp4	chr10:80065626-80078528	30.3463	30.7683	33.3254	33.9135	26.352	28.9519	31.2322	32.6524	33.8011
Mir6912	chr10:80072004-80072074	0	0	0	0	0	0	0	0	0
Csnk1g2	chr10:80085524-80103516	61.3549	65.1677	69.0867	62.9652	62.1855	61.8008	61.5553	65.1316	69.7835
Btbd2	chr10:80105361-80119816	4.45128	4.75349	5.52367	3.97391	4.80578	4.25114	3.27012	3.48699	5.15186
Mknk2	chr10:80128062-80139038	58.8996	62.3771	59.6319	58.7188	65.1933	60.3972	84.0793	75.2434	82.326
Mob3a	chr10:80147997-80164565	41.0886	45.3888	46.4153	42.6096	45.7381	43.8435	38.6014	37.5942	41.2945
Izumo4	chr10:80165437-80168127	1.61159	3.31611	1.6748	2.48546	3.2133	3.15155	0.520752	0.824997	1.07428
Ap3d1	chr10:80169722-80204956	40.1377	37.2154	31.6701	51.0374	47.4112	46.7723	27.5802	30.3938	34.2348
Dot1l	chr10:80217950-80257092	25.5177	23.3307	25.0612	23.4568	22.9666	20.5193	31.5199	33.2836	27.4245
Plekhj1	chr10:80258843-80261371	34.3523	37.9038	48.7534	37.8546	36.2478	40.1945	51.8643	55.5757	42.0024
Sf3a2	chr10:80261479-80267667	70.4309	70.7952	72.8223	60.3734	55.1205	55.8827	79.0844	89.7001	80.462
Amh	chr10:80267992-80270393	0.115666	0.0370225	0.201941	0	0.201795	0.294575	0.299001	0.310859	0.337323
Jsrp1	chr10:80271240-80276243	0.0617644	0.177926	0	0.0588342	0	0.0589873	0	0.0553317	0
Oaz1	chr10:80289400-80292035	275.627	258.285	305.628	235.765	232.613	247.997	191.874	189.654	195.676
Oaz1-ps	chr10:80289440-80291962	193.264	221.164	215.865	262.484	209.185	249.716	190.704	212.804	186.585
Mir1982	chr10:80291541-80291615	143.314	137.616	0	273.03	125.015	273.741	0	385.164	250.773
Lingo3	chr10:80295547-80306784	0	0.0167306	0	0	0	0	0.18579	0.0312174	0
Lsm7	chr10:80315569-80317954	117.988	125.385	133.916	90.0346	65.5135	81.9144	219.859	234.528	152.323
Sppl2b	chr10:80318019-80331453	18.4313	18.5713	15.5176	12.8254	10.1962	11.5265	26.8211	29.6908	21.4331
Tmprss9	chr10:80342560-80362239	0.0346644	0.0332863	0.0151301	0	0	0.0165529	0.0168016	0	0
Timm13	chr10:80362194-80363714	57.7085	51.3349	54.0849	53.4992	42.8805	49.8447	67.066	72.6542	58.0195
Lmnb2	chr10:80364107-80380990	41.229	40.3755	41.0835	30.9034	32.21	31.4254	40.5876	41.5877	41.8915
Gadd45b	chr10:80392835-80394949	22.9666	24.702	13.3812	15.6626	17.7208	14.5889	15.3223	10.6912	10.7661
Gng7	chr10:80411368-80477670	0.766987	0.942031	1.26123	0.52671	0.435518	0.743605	1.52161	2.17319	1.01436
Diras1	chr10:80482334-80488122	0	0	0	0	0	0	0.020105	0.0185799	0.0181455
Slc39a3	chr10:80491284-80496657	2.45513	2.37412	1.9319	2.7998	2.83543	3.35199	1.96096	2.54019	2.66232
Sgta	chr10:80506817-80522899	65.443	63.1515	65.0699	59.9064	54.0988	57.2536	64.3169	61.146	75.3524
Thop1	chr10:80532827-80545105	40.668	41.2548	46.8597	30.5808	23.3201	25.5541	87.2399	84.7336	60.7708
Creb3l3	chr10:80547077-80561617	0.0270945	0.104069	0	0.0258092	0.023635	0.0517526	0.10506	0.169909	0
Mir5615-1	chr10:80567358-80567418	0	0	0	0	0	0	0	0	0
Mir5615-2	chr10:80567360-80567420	0	0	0	0	0	0	0	0	0
Map2k2	chr10:80568691-80587442	38.3971	36.3468	35.695	38.5298	38.2745	41.8792	38.1405	39.9352	35.8433
Zbtb7a	chr10:80599015-80614402	23.2555	22.0065	18.969	23.0346	24.8967	23.0217	18.0961	19.9255	23.2639
Pias4	chr10:80616715-80630465	27.4118	25.5064	26.4905	22.1395	20.9144	21.6072	21.4079	20.9944	28.9145
Eef2	chr10:80639375-80645254	1351.39	1373.81	1607.21	1396.65	1143.35	1138.04	1667.12	1786.63	1595.3
Snord37	chr10:80641705-80641758	0	0	0	0	0	0	0	0	0
Dapk3	chr10:80645751-80655942	23.9145	25.2004	27.2322	22.639	24.4397	25.2791	26.4474	25.3311	26.6298
Atcayos	chr10:80657435-80671115	0	0	0	0	0	0	0	0	0
Atcay	chr10:80667257-80693524	0	0	0.0424758	0	0	0	0	0	0.0141904
Nmrk2	chr10:80660914-80664782	0.224281	0.180206	0.289374	0.211038	0.161397	0.207986	0.202197	0.23391	0.2002
Zfr2	chr10:80695907-80714868	0.161609	0.25864	0.172426	0.0855234	0.109647	0.154343	0.191475	0.225209	0.251365
Matk	chr10:80715679-80725726	13.1882	14.6727	5.1666	1.41971	2.27699	1.96817	6.52	4.45888	2.91491
Mrpl54	chr10:80727466-80729671	81.4771	83.7455	86.1462	72.4283	62.8631	80.3419	76.5592	85.9031	59.4469
Apba3	chr10:80730916-80735992	16.1618	17.7363	17.6226	12.6037	12.5231	12.2407	13.9167	13.4179	15.4091
Mir3057	chr10:80734341-80734432	0	0	0	0	0	0	0	0	0
Tjp3	chr10:80735932-80754326	3.51852	5.14352	7.10192	3.17579	4.04018	3.81195	10.6307	9.54749	7.44215
[truncated: 22,855 more rows]

## Sheet: KEGG pathway-HOXA9top500 
{\rtf1\ansi\ansicpg932\cocoartf1561\cocoasubrtf200
{\fonttbl\f0\fmodern\fcharset0 Courier;}
{\colortbl;\red255\green255\blue255;\red0\green0\blue0;}
{\*\expandedcolortbl;;\cssrgb\c0\c0\c0;}
\paperw11900\paperh16840\margl1440\margr1440\vieww41580\viewh8240\viewkind0
\deftab720
\pard\pardeftab720\partightenfactor0
\f0\fs26 \cf0 \expnd0\expndtw0\kerning0
Category	Term	Count	%	PValue	Genes	List Total	Pop Hits	Pop Total	Fold Enrichment	Bonferroni	Benjamini	FDR\
KEGG_PATHWAY	mmu04060:Cytokine-cytokine receptor interaction	23	0.0385305	8.53579e-07	IL1R2, CCL3, CCL2, IL6ST, CSF2RB2, CCR1, CSF1, IL21R, IL4RA, TGFB3, TNFSF12, IL7R, CCL4, CCL7, CCR5, CCR4, IL10RA, CCR2, IL1B, CSF3R, FAS, IL1A, CSF1R	213	245	7720	3.40251	0.000180089	0.000180089	0.0010792419579797041\
KEGG_PATHWAY	mmu05332:Graft-versus-host disease	11	0.0184276	1.13894e-06	CD80, H2-M3, IL1B, H2-DMB1, FAS, H2-DMA, H2-Q6, H2-Q7, H2-DMB2, IL1A, CD28	213	52	7720	7.66703	0.000240287	0.000120151	0.0014400388421931254\
KEGG_PATHWAY	mmu04380:Osteoclast differentiation	16	0.0268038	1.61591e-06	FOSL2, SOCS3, CSF1, RELB, FCGR3, PIRB, SIRPB1B, CYBB, PIRA6, LOC100038947, PIRA4, LILRA6, IL1B, TREM2, IL1A, CSF1R	213	126	7720	4.60243	0.0003409	0.000113646	0.002043109742055904\
KEGG_PATHWAY	mmu04940:Type I diabetes mellitus	11	0.0184276	6.08974e-06	CD80, H2-M3, IL1B, H2-DMB1, FAS, H2-DMA, H2-Q6, H2-Q7, H2-DMB2, IL1A, CD28	213	62	7720	6.43041	0.00128411	0.000321183	0.007699468623378891\
KEGG_PATHWAY	mmu04145:Phagosome	17	0.0284791	2.12568e-05	RAB7B, TUBB2B, H2-M3, TUBB2A, H2-DMB1, CTSS, TLR6, H2-Q6, H2-Q7, ITGAM, H2-DMB2, FCGR3, CYBB, TAP2, TAP1, CLEC7A, H2-DMA	213	174	7720	3.54109	0.00447518	0.000896643	0.026873282470296633\
KEGG_PATHWAY	mmu05150:Staphylococcus aureus infection	9	0.0150771	5.63597e-05	C3AR1, CFB, H2-DMB1, FPR2, H2-DMA, ITGAM, H2-DMB2, PTAFR, FCGR3	213	50	7720	6.52394	0.0118218	0.00198008	0.07123669796812448\
KEGG_PATHWAY	mmu04612:Antigen processing and presentation	11	0.0184276	7.5067e-05	H2-M3, TAP2, LGMN, TAP1, H2-DMB1, CTSS, H2-DMA, H2-Q6, H2-Q7, CD74, H2-DMB2	213	82	7720	4.86202	0.0157149	0.00226026	0.09487163555741418\
KEGG_PATHWAY	mmu05323:Rheumatoid arthritis	11	0.0184276	7.5067e-05	CCL3, CCL2, CD80, CSF1, TGFB3, IL1B, H2-DMB1, H2-DMA, H2-DMB2, IL1A, CD28	213	82	7720	4.86202	0.0157149	0.00226026	0.09487163555741418\
KEGG_PATHWAY	mmu04640:Hematopoietic cell lineage	11	0.0184276	9.23617e-05	IL1R2, CSF1, IL4RA, ITGA1, IL1B, CSF3R, ANPEP, IL7R, ITGAM, IL1A, CSF1R	213	84	7720	4.74626	0.0193005	0.00243319	0.11671748539278104\
KEGG_PATHWAY	mmu05152:Tuberculosis	16	0.0268038	9.39617e-05	TGFB3, H2-DMB1, CTSS, TLR6, ITGAM, H2-DMB2, CD74, FCGR3, ITGAX, CLEC4E, BCL2, IL10RA, IL1B, CLEC7A, H2-DMA, IL1A	213	176	7720	3.29492	0.0196316	0.00220056	0.11873826220729633\
KEGG_PATHWAY	mmu05330:Allograft rejection	9	0.0150771	0.000129459	CD80, H2-M3, H2-DMB1, FAS, H2-DMA, H2-Q6, H2-Q7, H2-DMB2, CD28	213	56	7720	5.82495	0.0269478	0.00272803	0.16356180186325453\
KEGG_PATHWAY	mmu04514:Cell adhesion molecules (CAMs)	15	0.0251286	0.000137768	ICOSL, H2-M3, SELL, NTNG2, H2-DMB1, CDH1, H2-Q6, H2-Q7, ITGAM, H2-DMB2, CD80, PECAM1, VCAN, H2-DMA, CD28	213	162	7720	3.35594	0.0286525	0.00263933	0.17405112714795612\
KEGG_PATHWAY	mmu05168:Herpes simplex infection	17	0.0284791	0.000184385	SP100, CCL2, H2-M3, SOCS3, TAF9B, H2-DMB1, ARNTL, H2-Q6, H2-Q7, CD74, H2-DMB2, CFP, TAP2, TAP1, IL1B, FAS, H2-DMA	213	208	7720	2.96226	0.0381616	0.00323715	0.23288252079602945\
KEGG_PATHWAY	mmu05321:Inflammatory bowel disease (IBD)	9	0.0150771	0.000188315	STAT4, IL21R, IL4RA, TGFB3, IL1B, H2-DMB1, H2-DMA, H2-DMB2, IL1A	213	59	7720	5.52877	0.0389591	0.00305212	0.23784120573860923\
KEGG_PATHWAY	mmu05320:Autoimmune thyroid disease	9	0.0150771	0.00068159	CD80, H2-M3, H2-DMB1, FAS, H2-DMA, H2-Q6, H2-Q7, H2-DMB2, CD28	213	71	7720	4.59433	0.133995	0.0102234	0.8583773437827125\
KEGG_PATHWAY	mmu05140:Leishmaniasis	8	0.0134019	0.00175546	TGFB3, IL1B, H2-DMB1, H2-DMA, ITGAM, H2-DMB2, IL1A, FCGR3	213	64	7720	4.53052	0.309768	0.0244123	2.197027148114117\
KEGG_PATHWAY	mmu04672:Intestinal immune network for IgA production	6	0.0100514	0.00554342	ICOSL, CD80, H2-DMB1, H2-DMA, H2-DMB2, CD28	213	42	7720	5.17773	0.690536	0.0706847	6.787169782920266\
KEGG_PATHWAY	mmu05416:Viral myocarditis	8	0.0134019	0.00579813	CD80, H2-M3, H2-DMB1, H2-DMA, H2-Q6, H2-Q7, H2-DMB2, CD28	213	79	7720	3.67029	0.706819	0.0696314	7.0885893307476415\
KEGG_PATHWAY	mmu04142:Lysosome	10	0.0167524	0.00626009	SGSH, SLC11A1, NPC1, AP1S2, PSAP, LGMN, SMPD1, CTSS, NAPSA, CTSH	213	122	7720	2.97083	0.734205	0.0709686	7.632963051634045\
KEGG_PATHWAY	mmu04062:Chemokine signaling pathway	13	0.0217781	0.00773372	CCL3, CCL2, CCR1, HCK, CXCL2, CCL9, GNG11, CCL4, CCL7, CCR5, CCR4, CCR2, GNG2	213	196	7720	2.40395	0.805662	0.0826065	9.34993844519536\
KEGG_PATHWAY	mmu04668:TNF signaling pathway	9	0.0150771	0.0100368	CCL2, SOCS3, CSF1, CXCL2, CREB3L2, IL1B, FAS, TNFAIP3, MMP14	213	109	7720	2.99263	0.88098	0.100956	11.974558523747147\
KEGG_PATHWAY	mmu05202:Transcriptional misregulation in cancer	11	0.0184276	0.0158976	CEBPA, IL1R2, FUT8, ID2, CDKN2C, IGF1, GRIA3, BCL6, HPGD, ITGAM, CSF1R	213	166	7720	2.40172	0.965998	0.148721	18.341170450032195\
KEGG_PATHWAY	mmu05145:Toxoplasmosis	8	0.0134019	0.0355952	CCR5, LY96, BCL2, IL10RA, TGFB3, H2-DMB1, H2-DMA, H2-DMB2	213	113	7720	2.56596	0.999523	0.293629	36.76191961889479\
KEGG_PATHWAY	mmu04630:Jak-STAT signaling pathway	9	0.0150771	0.0459646	STAT4, IL6ST, SOCS3, CSF2RB2, IL10RA, IL21R, IL4RA, CSF3R, IL7R	213	145	7720	2.24964	0.999951	0.350579	44.840868625611066\
KEGG_PATHWAY	mmu05133:Pertussis	6	0.0100514	0.052175	LY96, IRF8, IL1B, NLRP3, ITGAM, IL1A	213	74	7720	2.93871	0.999988	0.375688	49.21260407462565\
KEGG_PATHWAY	mmu04620:Toll-like receptor signaling pathway	7	0.0117267	0.0589444	CCL3, IRF5, CD80, LY96, IL1B, TLR6, CCL4	213	101	7720	2.51197	0.999997	0.401157	53.61290991877967\
KEGG_PATHWAY	mmu05132:Salmonella infection	6	0.0100514	0.062734	RAB7B, CCL3, CXCL2, IL1B, CCL4, IL1A	213	78	7720	2.78801	0.999999	0.408906	55.92015326457134\
KEGG_PATHWAY	mmu04015:Rap1 signaling pathway	11	0.0184276	0.0701027	FYB, ADORA2B, PGF, CSF1, SIPA1L2, IGF1, CDH1, RALGDS, ITGAM, PRKD3, CSF1R	213	214	7720	1.86302	1	0.433336	60.106809279330584\
KEGG_PATHWAY	mmu05166:HTLV-I infection	13	0.0217781	0.0799462	EGR1, IL1R2, EGR2, ATF3, H2-M3, CDKN2C, RELB, TGFB3, H2-DMB1, H2-DMA, H2-Q6, H2-Q7, H2-DMB2	213	278	7720	1.69487	1	0.466288	65.12918237919548\
KEGG_PATHWAY	mmu04080:Neuroactive ligand-receptor interaction	13	0.0217781	0.0928201	F2RL2, C3AR1, P2RY13, P2RX4, S1PR3, ADRB2, ADORA2B, P2RY14, CNR2, GRIA3, FPR2, GLP1R, PTAFR	213	285	7720	1.65324	1	0.507753	70.82007320665595\
KEGG_PATHWAY	mmu05164:Influenza A	9	0.0150771	0.0982884	CCL2, SOCS3, IL1B, H2-DMB1, FAS, H2-DMA, NLRP3, H2-DMB2, IL1A	213	171	7720	1.90759	1	0.516968	72.96759602807272}

## Sheet: KEGG pathway-MYCtop500
{\rtf1\ansi\ansicpg932\cocoartf1561\cocoasubrtf200
{\fonttbl\f0\fmodern\fcharset0 Courier;}
{\colortbl;\red255\green255\blue255;\red0\green0\blue0;}
{\*\expandedcolortbl;;\cssrgb\c0\c0\c0;}
\paperw11900\paperh16840\margl1440\margr1440\vieww10800\viewh8400\viewkind0
\deftab720
\pard\pardeftab720\partightenfactor0
\f0\fs26 \cf0 \expnd0\expndtw0\kerning0
Category	Term	Count	%	PValue	Genes	List Total	Pop Hits	Pop Total	Fold Enrichment	Bonferroni	Benjamini	FDR\
KEGG_PATHWAY	mmu03008:Ribosome biogenesis in eukaryotes	11	0.0156394	2.37941e-05	DKC1, GAR1, TCOF1, POP1, CIRH1A, NOP56, MDN1, NHP2, WDR43, RIOK2, GNL3	184	83	7720	5.5605	0.00517374	0.00517374	0.03023970151855293\
KEGG_PATHWAY	mmu00260:Glycine, serine and threonine metabolism	8	0.0113741	3.60663e-05	SHMT1, ALDH7A1, CTH, GATM, MAOA, GCAT, PSPH, PSAT1	184	40	7720	8.3913	0.00783176	0.00392358	0.045833041453124945\
KEGG_PATHWAY	mmu01130:Biosynthesis of antibiotics	17	0.02417	4.44943e-05	BCAT1, SHMT1, ACY1, SUCLG2, ADPGK, AK3, AK4, PSPH, PPAT, GART, NME4, ALDH7A1, CTH, ADSL, PSAT1, ALDH9A1, PRODH	184	214	7720	3.33299	0.00965308	0.0032281	0.056540540789340454\
KEGG_PATHWAY	mmu00230:Purine metabolism	15	0.0213265	8.33198e-05	POLR2F, POLR3H, POLR1A, AK3, PDE3B, POLR1B, AK4, GMPR, PPAT, ADA, GART, NME4, NT5C3, ADSL, IMPDH2	184	179	7720	3.51591	0.0180005	0.00453082	0.10585352965016837\
KEGG_PATHWAY	mmu01100:Metabolic pathways	51	0.0725101	0.00013908	CTPS, ACOT1, LTC4S, PSPH, MTHFD1L, MTHFD1, MTHFD2, NT5C3, ITPK1, IMPDH2, AGPAT2, GATM, SUCLG2, PIK3C2B, POLR1A, PDXP, POLR1B, PMM1, LPCAT4, NME4, ALDH7A1, GLUL, CTH, DGAT2, MTAP, ADSL, ALDH9A1, PRODH, BCAT1, ME1, POLR2F, SRM, ADPGK, ADA, PPAT, GLS2, GALK1, DHODH, LIPT1, DCTD, SHMT1, ACY1, POLR3H, MAOA, ACER2, AK4, GART, KHK, MBOAT2, PSAT1, PHYKPL	184	1278	7720	1.67432	0.0298665	0.00604596	0.17663627128584602\
KEGG_PATHWAY	mmu00240:Pyrimidine metabolism	10	0.0142177	0.000716745	DCTD, NME4, POLR2F, POLR3H, CTPS, NT5C3, POLR1A, TXNRD3, DHODH, POLR1B	184	103	7720	4.07345	0.144703	0.0257147	0.9072182529428541\
KEGG_PATHWAY	mmu00670:One carbon pool by folate	5	0.00710884	0.000895963	MTHFD1, SHMT1, MTHFD2, MTHFD1L, GART	184	19	7720	11.0412	0.177501	0.0275293	1.13287448473407\
KEGG_PATHWAY	mmu01230:Biosynthesis of amino acids	8	0.0113741	0.00239828	BCAT1, SHMT1, ALDH7A1, CTH, GLUL, ACY1, PSPH, PSAT1	184	78	7720	4.30323	0.407529	0.0633369	3.005934146380407\
KEGG_PATHWAY	mmu00330:Arginine and proline metabolism	6	0.0085306	0.00580844	ALDH7A1, SRM, GATM, MAOA, ALDH9A1, PRODH	184	49	7720	5.13753	0.719149	0.131601	7.136959302419122\
KEGG_PATHWAY	mmu03320:PPAR signaling pathway	7	0.00995237	0.0115244	SCD1, SORBS1, OLR1, PPARG, FABP4, FADS2, ANGPTL4	184	80	7720	3.6712	0.920094	0.223292	13.699407898484562\
KEGG_PATHWAY	mmu00561:Glycerolipid metabolism	6	0.0085306	0.0117706	MOGAT2, ALDH7A1, DGAT2, MBOAT2, ALDH9A1, AGPAT2	184	58	7720	4.34033	0.924318	0.209157	13.972257146155698\
KEGG_PATHWAY	mmu03020:RNA polymerase	4	0.00568707	0.033278	POLR2F, POLR3H, POLR1A, POLR1B	184	30	7720	5.5942	0.999375	0.459272	34.96108341407792\
KEGG_PATHWAY	mmu03013:RNA transport	9	0.0127959	0.0487842	XPOT, TRNT1, ELAC2, XPO5, PRMT5, POP1, GEMIN4, SMN1, GEMIN5	184	170	7720	2.22123	0.999982	0.567729	47.04439730376927\
KEGG_PATHWAY	mmu00250:Alanine, aspartate and glutamate metabolism	4	0.00568707	0.0565306	GLS2, GLUL, ADSL, PPAT	184	37	7720	4.53584	0.999997	0.595912	52.27199555966102\
KEGG_PATHWAY	mmu00910:Nitrogen metabolism	3	0.0042653	0.0602031	GLUL, CAR12, CAR4	184	17	7720	7.40409	0.999999	0.594404	54.58035701628956\
KEGG_PATHWAY	mmu00220:Arginine biosynthesis	3	0.0042653	0.0734182	GLS2, GLUL, ACY1	184	19	7720	6.62471	1	0.646173	62.06236827788709}
