# Supplementary material for: HOXA9 promotes MYC-mediated leukemogenesis by maintaining gene expression for multiple anti-apoptotic pathways
Source: eLife. 2021 Jul 26;10:e64148. doi: 10.7554/eLife.64148 (PMC8313233; doi:10.7554/eLife.64148)
Supplement: Figure 4—source data 1. [file elife-64148-fig4-data1.xlsx]

## Sheet: AML and ALL
	HOXA9-209905_at	MEIS1-204069_at	MYC-202431_s_at
AML with t(11q23)/MLL	13.5105	7.69803	11.0794
AML with t(11q23)/MLL	10.8741	8.28992	11.6068
AML with t(11q23)/MLL	12.8091	9.06993	12.1316
AML with t(11q23)/MLL	12.0282	8.99493	12.9162
AML with t(11q23)/MLL	12.2613	7.80591	10.2088
AML with t(11q23)/MLL	8.954	10.0491	10.3973
AML with t(11q23)/MLL	10.8204	10.7305	9.29964
AML with t(11q23)/MLL	13.3938	10.8684	11.8533
AML with t(11q23)/MLL	11.6625	10.1717	12.7774
AML with t(11q23)/MLL	13.6906	9.2335	9.56518
AML with t(11q23)/MLL	12.6787	10.4568	12.6173
AML with t(11q23)/MLL	14.0487	9.84668	10.8787
AML with t(11q23)/MLL	13.1824	10.4462	11.2636
AML with t(11q23)/MLL	14.617	10.3249	11.6602
AML with t(11q23)/MLL	13.0965	12.3717	13.6417
AML with t(11q23)/MLL	12.5789	11.0999	11.0399
AML with t(11q23)/MLL	13.996	11.181	10.5516
AML with t(11q23)/MLL	12.9694	10.785	10.2055
AML with t(11q23)/MLL	13.3071	11.6158	10.614
AML with t(11q23)/MLL	12.976	11.3732	15.2807
AML with t(11q23)/MLL	12.1077	10.087	10.059
AML with t(11q23)/MLL	14.06	12.1651	13.2764
AML with t(11q23)/MLL	12.0211	10.3201	11.1884
AML with t(11q23)/MLL	13.6697	10.236	12.3544
AML with t(11q23)/MLL	13.0435	11.438	13.3543
AML with t(11q23)/MLL	13.7569	13.0206	13.2134
AML with t(11q23)/MLL	13.6024	12.3697	10.8007
AML with t(11q23)/MLL	13.9845	10.6957	9.92555
AML with t(11q23)/MLL	10.5257	11.9838	13.185
AML with t(11q23)/MLL	13.9299	12.0345	11.2341
AML with t(11q23)/MLL	13.2533	11.6262	11.0885
AML with t(11q23)/MLL	14.6502	12.1886	11.4386
AML with t(11q23)/MLL	13.4174	11.0313	11.1004
AML with t(11q23)/MLL	14.3443	12.0863	8.73468
AML with t(11q23)/MLL	13.2072	12.456	11.6823
AML with t(11q23)/MLL	14.9767	11.4659	9.92792
AML with t(11q23)/MLL	13.5352	12.4909	9.66086
AML with t(11q23)/MLL	15.4741	13.3185	10.4354
Pro-B-ALL with t(11q23)/MLL	12.6275	5.60815	15.2846
Pro-B-ALL with t(11q23)/MLL	13.1327	5.95371	13.4316
Pro-B-ALL with t(11q23)/MLL	4.48909	10.5009	14.61
Pro-B-ALL with t(11q23)/MLL	12.2683	10.716	12.1956
Pro-B-ALL with t(11q23)/MLL	12.4804	10.8287	12.2706
Pro-B-ALL with t(11q23)/MLL	12.6707	10.3204	11.3648
Pro-B-ALL with t(11q23)/MLL	12.3992	11.9882	12.1531
Pro-B-ALL with t(11q23)/MLL	11.1926	11.9044	10.3403
Pro-B-ALL with t(11q23)/MLL	12.2769	11.8154	12.2814
Pro-B-ALL with t(11q23)/MLL	7.98198	11.3029	14.3037
Pro-B-ALL with t(11q23)/MLL	11.4407	12.2357	12.3395
Pro-B-ALL with t(11q23)/MLL	13.4693	11.1078	9.94971
Pro-B-ALL with t(11q23)/MLL	4.40854	10.7195	13.151
Pro-B-ALL with t(11q23)/MLL	11.6608	12	11.1093
Pro-B-ALL with t(11q23)/MLL	13.2742	12.0007	13.4613
Pro-B-ALL with t(11q23)/MLL	13.8383	12.3628	13.8668
Pro-B-ALL with t(11q23)/MLL	13.8522	12.5906	13.3313
Pro-B-ALL with t(11q23)/MLL	12.7343	11.4455	12.4305
Pro-B-ALL with t(11q23)/MLL	12.1758	12.5551	10.6923
Pro-B-ALL with t(11q23)/MLL	12.6527	11.4411	12.8897
Pro-B-ALL with t(11q23)/MLL	13.4806	12.5574	13.3072
Pro-B-ALL with t(11q23)/MLL	13.442	12.4443	13.556
Pro-B-ALL with t(11q23)/MLL	3.75478	12.4474	11.7841
Pro-B-ALL with t(11q23)/MLL	14.4231	12.1162	12.4477
Pro-B-ALL with t(11q23)/MLL	5.60904	12.9379	12.189
Pro-B-ALL with t(11q23)/MLL	12.6607	11.2495	11.943
Pro-B-ALL with t(11q23)/MLL	13.9539	12.478	13.6017
Pro-B-ALL with t(11q23)/MLL	13.4873	12.6715	13.4613
Pro-B-ALL with t(11q23)/MLL	12.8013	12.2918	12.6626
Pro-B-ALL with t(11q23)/MLL	13.9754	12.5605	13.7038
Pro-B-ALL with t(11q23)/MLL	13.0144	13.0632	11.932
Pro-B-ALL with t(11q23)/MLL	4.39631	12.127	14.601
Pro-B-ALL with t(11q23)/MLL	13.8529	11.8812	12.4424
Pro-B-ALL with t(11q23)/MLL	14.4829	12.9595	13.0481
Pro-B-ALL with t(11q23)/MLL	4.52279	12.305	13.4587
Pro-B-ALL with t(11q23)/MLL	6.34003	13.0325	14.5949
Pro-B-ALL with t(11q23)/MLL	4.26911	13.1555	12.0709
Pro-B-ALL with t(11q23)/MLL	4.12778	12.8526	14.1089
Pro-B-ALL with t(11q23)/MLL	14.3876	13.1667	10.4495
Pro-B-ALL with t(11q23)/MLL	13.6397	12.5902	14.5904
Pro-B-ALL with t(11q23)/MLL	14.0562	12.1803	11.4298
Pro-B-ALL with t(11q23)/MLL	14.0008	12.6792	12.4446
Pro-B-ALL with t(11q23)/MLL	12.9138	11.7985	13.9481
Pro-B-ALL with t(11q23)/MLL	13.8797	12.9497	14.4459
Pro-B-ALL with t(11q23)/MLL	13.0405	12.6283	14.1969
Pro-B-ALL with t(11q23)/MLL	13.3002	12.8424	14.5064
Pro-B-ALL with t(11q23)/MLL	14.008	12.3446	10.1319
Pro-B-ALL with t(11q23)/MLL	13.2296	12.6147	13.2264
Pro-B-ALL with t(11q23)/MLL	13.9224	12.3309	13.4319
Pro-B-ALL with t(11q23)/MLL	13.1914	12.1779	12.2414
Pro-B-ALL with t(11q23)/MLL	4.31281	12.4756	13.4704
Pro-B-ALL with t(11q23)/MLL	14.6354	12.8112	12.6946
Pro-B-ALL with t(11q23)/MLL	14.7708	13.301	11.7127
Pro-B-ALL with t(11q23)/MLL	13.5088	13.8096	13.2306
Pro-B-ALL with t(11q23)/MLL	12.7941	13.5714	13.481
Pro-B-ALL with t(11q23)/MLL	13.7996	12.6276	12.9494
Pro-B-ALL with t(11q23)/MLL	3.9518	13.065	14.9447
Pro-B-ALL with t(11q23)/MLL	14.3429	13.9196	13.0154
Pro-B-ALL with t(11q23)/MLL	14.7832	12.6777	12.8352
Pro-B-ALL with t(11q23)/MLL	13.9084	13.4673	12.7789
Pro-B-ALL with t(11q23)/MLL	12.6479	12.4413	13.4745
Pro-B-ALL with t(11q23)/MLL	15.0364	12.9276	13.9908
Pro-B-ALL with t(11q23)/MLL	12.8347	13.5985	13.2065
Pro-B-ALL with t(11q23)/MLL	14.5185	13.043	14.1258
Pro-B-ALL with t(11q23)/MLL	2.19915	13.6276	13.3945
Pro-B-ALL with t(11q23)/MLL	13.2153	13.2854	10.2144
Pro-B-ALL with t(11q23)/MLL	14.0292	13.7924	13.5972
Pro-B-ALL with t(11q23)/MLL	13.0657	14.6633	13.6353
Pro-B-ALL with t(11q23)/MLL	14.3617	13.8629	14.4415
Pro-B-ALL with t(11q23)/MLL	13.868	13.7609	12.1008
